# Supplementary material for: Mental health in the UK during the COVID-19 pandemic: cross-sectional analyses from a community cohort study
Source: PubMed Central journal article supplement — BMJ Open. 2020 Sep 15;10(9):e040620. doi: 10.1136/bmjopen-2020-040620 (PMC7493070; doi:10.1136/bmjopen-2020-040620), 2020-09-15
Supplement: bmjopen-2020-040620.draft_revisions.pdf [file bmjopen-2020-040620.draft_revisions.pdf]

# BMJ Open

BMJ Open is committed to open peer review. As part of this commitment we make the peer review history of every article we publish publicly available.

When an article is published we post the peer reviewers' comments and the authors' responses online. We also post the versions of the paper that were used during peer review. These are the versions that the peer review comments apply to.

The versions of the paper that follow are the versions that were submitted during the peer review process. They are not the versions of record or the final published versions. They should not be cited or distributed as the published version of this manuscript.

BMJ Open is an open access journal and the full, final, typeset and author-corrected version of record of the manuscript is available on our site with no access controls, subscription charges or pay-per-view fees (<http://bmjopen.bmj.com>).

If you have any questions on BMJ Open's open peer review process please email [info.bmjopen@bmj.com](mailto:info.bmjopen@bmj.com)

# BMJ Open

## Mental health in the UK during the COVID-19 pandemic

|                               |                                                                                                                                                                                                                                                                                                                                                                                                                                                                                                                                                             |
|-------------------------------|-------------------------------------------------------------------------------------------------------------------------------------------------------------------------------------------------------------------------------------------------------------------------------------------------------------------------------------------------------------------------------------------------------------------------------------------------------------------------------------------------------------------------------------------------------------|
| Journal:                      | <i>BMJ Open</i>                                                                                                                                                                                                                                                                                                                                                                                                                                                                                                                                             |
| Manuscript ID                 | bmjopen-2020-040620                                                                                                                                                                                                                                                                                                                                                                                                                                                                                                                                         |
| Article Type:                 | Original research                                                                                                                                                                                                                                                                                                                                                                                                                                                                                                                                           |
| Date Submitted by the Author: | 18-May-2020                                                                                                                                                                                                                                                                                                                                                                                                                                                                                                                                                 |
| Complete List of Authors:     | Jia, Ru; University of Nottingham Division of Primary Care<br>Ayling, Kieran; University of Nottingham Division of Primary Care<br>Chalder, Trudie; King's College London, PSYCHOLOGICAL MEDICINE<br>Massey, Adam; University of Nottingham Division of Primary Care<br>Broadbent, E; The University of Auckland Faculty of Medical and Health Sciences<br>Coupland, Carol; University of Nottingham Faculty of Medicine and Health Sciences, Division of Primary Care<br>Vedhara, Kavita; University of Nottingham Faculty of Medicine and Health Sciences |
| Keywords:                     | MENTAL HEALTH, PSYCHIATRY, PUBLIC HEALTH                                                                                                                                                                                                                                                                                                                                                                                                                                                                                                                    |
|                               |                                                                                                                                                                                                                                                                                                                                                                                                                                                                                                                                                             |

SCHOLARONE™  
Manuscripts

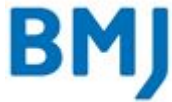

I, the Submitting Author has the right to grant and does grant on behalf of all authors of the Work (as defined in the below author licence), an exclusive licence and/or a non-exclusive licence for contributions from authors who are: i) UK Crown employees; ii) where BMJ has agreed a CC-BY licence shall apply, and/or iii) in accordance with the terms applicable for US Federal Government officers or employees acting as part of their official duties; on a worldwide, perpetual, irrevocable, royalty-free basis to BMJ Publishing Group Ltd ("BMJ") its licensees and where the relevant Journal is co-owned by BMJ to the co-owners of the Journal, to publish the Work in this journal and any other BMJ products and to exploit all rights, as set out in our [licence](#).

The Submitting Author accepts and understands that any supply made under these terms is made by BMJ to the Submitting Author unless you are acting as an employee on behalf of your employer or a postgraduate student of an affiliated institution which is paying any applicable article publishing charge ("APC") for Open Access articles. Where the Submitting Author wishes to make the Work available on an Open Access basis (and intends to pay the relevant APC), the terms of reuse of such Open Access shall be governed by a Creative Commons licence – details of these licences and which [Creative Commons](#) licence will apply to this Work are set out in our licence referred to above.

Other than as permitted in any relevant BMJ Author's Self Archiving Policies, I confirm this Work has not been accepted for publication elsewhere, is not being considered for publication elsewhere and does not duplicate material already published. I confirm all authors consent to publication of this Work and authorise the granting of this licence.

1  
2  
3 **Mental health in the UK during the COVID-19 pandemic**  
4  
5

6 **Brief title: Mental Health in the UK & COVID-19: A cohort study**  
7  
8  
9

10 <sup>1</sup>Ru Jia MSc [Research Assistant],

11 <sup>1</sup>Kieran Ayling PhD [Senior Research Fellow],

12 <sup>2</sup>Trudie Chalder PhD [Professor of Cognitive Behavioural Psychotherapy],

13 <sup>1</sup>Adam Massey PhD [Honorary Research Associate],

14 <sup>3</sup>Elizabeth Broadbent PhD [Professor in Health Psychology],

15 <sup>1</sup>Carol Coupland PhD [Professor of Medical Statistics],

16 <sup>1\*</sup>Kavita Vedhara PhD [Professor of Health Psychology]

17  
18  
19  
20  
21  
22  
23 <sup>1</sup>Division of Primary Care

24 University of Nottingham

25 University Park

26 Nottingham, NG7 2RD

27  
28  
29  
30  
31  
32 <sup>2</sup>Department of Psychological Medicine,

33 Institute of Psychiatry, Psychology & Neuroscience,

34 King's College London,

35 16, De Crespigny Park,

36 London, SE5 8AF,

37 United Kingdom.  
38  
39  
40  
41  
42  
43

44 <sup>3</sup>Department of Psychological Medicine,

45 University of Auckland,

46 Private bag 92019, Auckland,

47 New Zealand.  
48  
49  
50  
51  
52  
53  
54  
55

56 \* Author to whom all correspondence should be addressed: Professor Kavita Vedhara, Division of Primary  
57 Care, University of Nottingham, University Park, Nottingham, NG7 2RD, UK.

58 [Kavita.vedhara@nottingham.ac.uk](mailto:Kavita.vedhara@nottingham.ac.uk); Tel +44 115 8466931  
59  
60

## Abstract

**Objectives:** Previous pandemics have resulted in significant consequences for mental health. Here we report the mental health sequela of the COVID-19 pandemic on the UK population and examine modifiable and non-modifiable explanatory factors associated with mental health outcomes. We focus on the short-term consequences for mental health, as reported during the first four-six weeks of social distancing measures being introduced.

**Design:** Cross sectional online survey

**Setting:** Community cohort study

**Participants:** N=3097 adults aged  $\geq 18$  years were recruited through a mainstream and social media campaign between 3/4/20-30/4/20. The cohort was predominantly female (n=2618); mean age forty-four years; 10% (n=254) from minority ethnic groups; 50% (n=1559) described themselves as key-workers and 20% (n=649) identified as having clinical risk factors putting them at increased risk of COVID-19

**Main outcome measures:** depression, anxiety and stress.

**Results:** Mean scores for depression, stress and anxiety significantly exceeded population norms (all  $p < 0.0001$ ). Analysis of non-modifiable factors hypothesised to be associated with mental health outcomes indicated that being younger and female were associated with increased stress, anxiety and depression, with the final multivariable models accounting for 7-13% of variance. When adding modifiable factors, significant independent effects emerged for positive mood, perceived loneliness and worry about getting COVID-19 for all outcomes, with the final multivariable models accounting for 54-57% of variance.

**Conclusions:** Increased psychological morbidity was evident in this UK cohort, with younger people and women at particular risk. Interventions targeting perceptions of loneliness, risk of COVID-19, worry about COVID-19, and positive mood may be effective.

### Article Summary

- To our knowledge, this paper provides the first empirical evidence from a large cohort on the mental health impact of the COVID-19 pandemic on people in the UK
- The findings are based on a large community cohort of N=3097 adults aged 18 years or older, capturing the views of people across the UK, including key-workers and individuals from ethnic minority groups.
- The use of validated measures of mental health allows us to conclude that levels of depression, anxiety and stress significantly exceed previously reported population norms.
- The assessment of demographic and modifiable psychological variables allows us to report on which groups appear to be at greatest risk of increased psychological morbidity, as well as potential psychological targets for future interventions.
- The cross-sectional design prohibits an analysis of causal relationships and the recruitment of a self-selected community sample has implications for generalisability.

## Introduction

The COVID-19 (Coronavirus, 2019) pandemic has resulted in unprecedented disruption to the fabric of society, our health service and economy. However, the multitude of challenges presented by the pandemic may also pose a significant threat to our psychological health.<sup>1</sup> Individuals are facing a panoply of stressors including serious illness, bereavement, social distancing, and unemployment. The consequences of these stressors for mental health will not be uniform, rather they will be influenced by a range of modifiable and non-modifiable factors. Understanding these factors will be critical in determining who is at greatest risk of mental health difficulties and potential approaches to intervention. We report here cross-sectional findings from a community cohort study designed to capture both the mental health sequela of the COVID-19 pandemic, as well as the modifiable and non-modifiable explanatory factors associated with adverse mental health outcomes. Our focus is on the immediate consequences for mental health, as reported during the first 4-6 weeks of social distancing measures being introduced in the UK.

In keeping with its recent emergence, much remains unknown about COVID-19 and its consequences. However, the expectation is that the consequences for mental health will be profound and far reaching.<sup>1</sup> Evidence on the impact of the pandemic on people living in China attests to this possibility.<sup>2,3</sup>, as does the experience of previous pandemics.<sup>4,5</sup> Indeed, preliminary evidence from the UK suggests that these experiences may be replicated here.<sup>1,6</sup> But who might be at greatest risk of mental health difficulties? Individuals at increased risk of the disease and/or adverse outcomes might be expected to experience greater psychological morbidity. For example, the death rate is known to be higher in men and older individuals.<sup>7,8</sup> The latter being also more likely to have co-existing conditions and be socially-isolated through shielding. The ethnic diversity of countries such as the US and UK has also highlighted that individuals from Black, Asian and Minority Ethnic (BAME) backgrounds appear to be affected disproportionately by the disease.<sup>9</sup> Recent UK data also suggest that key-workers, in particular those in social care, are at greater risk of COVID-19 related mortality.<sup>7</sup>

The aforementioned factors are, however, largely non-modifiable. Do modifiable risk factors exist which could be targets for intervention? Stress and coping theory.<sup>10</sup> attests that emotional responses to challenging situations vary according to both our appraisal of stressors and the availability of psychological and social resources. Cognitions are central to the former and evidence from previous pandemics and the COVID-19 pandemic suggest that perceptions of the risk of contracting the disease and increased worry about risks to health are positively associated with adverse mental health outcomes.<sup>11-13</sup> In terms of resources, social support, and its corollary loneliness, are among the best established determinants of our emotional responses to stressors.

1  
2  
3 Successive systematic reviews demonstrate poorer mental health outcomes and increased morbidity and  
4 mortality in individuals who perceive themselves to be more lonely and lacking in support.<sup>14,15</sup> Positive mood,  
5 now no longer viewed as just the opposite of negative mood, may also confer direct effects on well-being as  
6 well as protective effects in challenging situations.<sup>10,16</sup> In terms of mental health, evidence suggests that the  
7 existence of positive mood reduces the risk of mood disorders by 28% and anxiety disorders by 53%, and also  
8 influences recovery from some mental health conditions.<sup>17,18</sup>

9  
10 Taken together there is an urgent need to report evidence on the prevalence of mental health problems during  
11 the COVID-19 pandemic, to understand who may be at greatest risk, and to explore the psychological and social  
12 resources that may mitigate this risk. To that end, we report cross sectional findings from a community cohort  
13 survey conducted between 3<sup>rd</sup> and 30<sup>th</sup> April 2020 which coincided with the first 4-6 weeks of social distancing  
14 measures being introduced in the UK.

## 25 26 **Methods**

### 27 28 **Ethics, Recruitment and Eligibility**

29  
30 Ethical approval was granted from the University of Nottingham Faculty of Medicine and Health Sciences (ref:  
31 506-2003) and the NHS Health Research Authority (ref: 20/HRA/1858). The study was launched on 3/4/20 with  
32 participants recruited in the community through a social and mainstream media campaign involving, but not  
33 limited to, Facebook and Twitter. In addition, HRA regulatory approval enabled us to approach NHS  
34 organisations and request they advertise the research through their routine communications. Recruitment  
35 continued until 30/4/20. All media directed potential participants to the study website  
36 ([www.covidstresstudy.co.uk](http://www.covidstresstudy.co.uk)) through which they accessed the information sheet, consent form and online  
37 survey.

38  
39 Eligibility criteria specified that participants should be: aged 18 and over; able to give informed consent; able to  
40 read English; residing in the UK at the time of completing the survey and able to provide a sample of hair at  
41 least 1 cm long. The latter was collected for the determination of the stress biomarker cortisol which will be the  
42 subject of future manuscripts.

### 43 44 **Patient and public involvement (PPI)**

45  
46 We convened a virtual PPI group to support this research the aims of which were to advise on the development  
47 of the survey, the participant information sheet and optimising recruitment. Individuals participated via MS  
48 Teams in one-to-one or group discussions. These discussions informed the length and structure of the survey,  
49  
50  
51  
52  
53  
54  
55  
56  
57  
58  
59  
60



1  
2  
3 language of the information sheet and strategies for recruiting via media and social media. The views of this  
4  
5 group were instrumental in achieving our large sample size.  
6

### 7 **Procedures**

8  
9 Consenting participants completed an online survey implemented through JISC Online Survey  
10 (<https://www.onlinesurveys.ac.uk/>). This included validated measures capturing the mental health outcomes:  
11 anxiety ( $\alpha=0.88$ ), depression ( $\alpha=0.92$ ) and stress ( $\alpha=0.76$ ).<sup>19-22</sup> We also measured modifiable and non-  
12 modifiable variables we hypothesised would be related to these mental health outcomes due to being (i)  
13 associated with an increased risk of contracting COVID-19 and/or adverse disease outcomes; or (ii) known to be  
14 directly associated with adverse mental health outcomes. These were: age, gender, ethnicity, key-worker status,  
15 living alone, positive mood, worry about contracting COVID-19 and perceived loneliness and risk of COVID-  
16 19 (see supplementary appendix).  
17  
18  
19  
20  
21  
22  
23

### 24 **Statistical analysis**

25  
26 We first summarised the outcome variables (depression, anxiety and stress) and participant characteristics with  
27 appropriate summary statistics and examined histograms and scatterplots. To explore the associations between  
28 non-modifiable and modifiable explanatory factors on outcome variables we conducted univariable linear  
29 regression analyses (see supplementary appendix). Multivariable linear regression analyses were then used to  
30 explore the independent relationships of non-modifiable factors (age, gender, ethnicity, keyworker status, living  
31 alone) on outcome variables. Then, in subsequent models, modifiable explanatory factors (perceived loneliness,  
32 perceived risk of COVID-19, positive mood, worry about contracting COVID-19) were added to examine the  
33 additional and independent contribution of these factors to explaining variation in the outcome variables. The  
34 variable assessing COVID-19 worry was treated as a categorical variable in all models, with “occasional worry”  
35 treated as the reference value as this was the most common response. Assumptions of linear regression  
36 (normality and homoscedasticity of residuals, linearity with continuous variables) and presence of outliers were  
37 assessed graphically. Square root transformations were used for depression and anxiety scores to satisfy  
38 assumptions. Robustness of the models were examined by removing data points with large residuals ( $<-3$  or  $>3$ )  
39 and comparing results to the original models. In the vast majority of models, this had no substantive effect on  
40 interpretation. Thus these results are only mentioned where interpretation may be affected. Additionally, as  
41 perceived risk of getting COVID-19 was not assessed in those who thought they had had it ( $n=519$ ) these  
42 participants are not represented in final multivariable models. As a sensitivity analysis, models were additionally  
43 re-specified excluding this explanatory variable (see supplementary appendix).  
44  
45  
46  
47  
48  
49  
50  
51  
52  
53  
54  
55  
56  
57  
58  
59  
60

For depression and anxiety we carried out additional analyses dichotomising according to established cut-offs (scores of 10 or greater indicating moderate or severe levels). We used multiple logistic regression to estimate odds ratios with 95% confidence intervals for their associations with non-modifiable and modifiable variables. Statistical analyses were performed using STATA (version 16).

### Role of sponsor

The study sponsor did not play a role in the study design, collection; analysis, and interpretation of data; in the writing of the report; or in the decision to submit the paper for publication.

## Results

### Cohort characteristics

The final number of participants recruited was n=3102. Of these, five were ineligible due to being less than 18 years old. Thus, yielding n=3097 eligible participants. The largest proportion of visitors to the website came direct to the URL (62%/n=15,218), followed by 25% (n=6068) via Facebook (the remainder through other websites). The vast majority of respondents accessed the website via a mobile phone (70%/n=17045). The survey was completed in full by 100% of those who started it, consequently there were no missing data, with the exception of age, for which 2 participants entered non-numeric values.

Table 1 summarises the main characteristics of the participants and reveals that our sample was predominantly female; with a mean age of 44 years (standard deviation=15); with participation across the UK (albeit primarily from England) and 10%/n=296 from minority ethnic backgrounds. Fifty percent (n=1559) described themselves as key-workers (39%/n=1198 identifying as working in health and social care). Twenty percent (n=649) identified themselves as having clinical risk factors which would put them at increased or greatest risk of COVID-19.

**Table 1: Participant Demographics (n=3097)**

|                           | Participants |
|---------------------------|--------------|
|                           | n (%)        |
| <b>Gender</b>             |              |
| Male                      | 476 (15.4%)  |
| Female                    | 2618 (84.5%) |
| Prefer not to say         | 3 (0.1%)     |
| <b>Age groups (years)</b> |              |
| 18-24                     | 363 (11.7%)  |

|    |                                                              |              |
|----|--------------------------------------------------------------|--------------|
| 1  |                                                              |              |
| 2  |                                                              |              |
| 3  | 25-34                                                        | 528 (17.1%)  |
| 4  | 35-44                                                        | 635 (20.5%)  |
| 5  | 45-54                                                        | 687 (22.2%)  |
| 6  | 55-64                                                        | 568 (18.3%)  |
| 7  | 65-74                                                        | 254 (8.2%)   |
| 8  | ≥75                                                          | 62 (2.0%)    |
| 9  |                                                              |              |
| 10 |                                                              |              |
| 11 | <b>Ethnicity</b>                                             |              |
| 12 | White – British, Irish, other                                | 2796 (90.3%) |
| 13 | Asian/Asian British – Indian, Pakistani, Bangladeshi, other  | 119 (3.8%)   |
| 14 | Black/Black British – Caribbean, African, other              | 42 (1.4%)    |
| 15 | Chinese/Chinese British                                      | 28 (0.9%)    |
| 16 | Mixed race – White and Black/Black British                   | 19 (0.6%)    |
| 17 | Middle Eastern/Middle Eastern British – Arab, Turkish, other | 23 (0.7%)    |
| 18 | Mixed race – other                                           | 40 (1.3%)    |
| 19 | Other ethnic group                                           | 25 (0.8%)    |
| 20 | Prefer not to say                                            | 5 (0.2%)     |
| 21 |                                                              |              |
| 22 | <b>Relationship status</b>                                   |              |
| 23 | Single, never married                                        | 574 (18.5%)  |
| 24 | Single, divorced or widowed                                  | 263 (8.5%)   |
| 25 | In a relationship/married but living apart                   | 254 (8.2%)   |
| 26 | In a relationship/married and cohabiting                     | 1981 (64.0%) |
| 27 | Prefer not to say                                            | 25 (0.8%)    |
| 28 |                                                              |              |
| 29 | <b>Education (highest level of attainment)</b>               |              |
| 30 | No qualifications                                            | 33 (1.1%)    |
| 31 | Completed GSCE/CSE/O-levels or equivalent                    | 252 (8.1%)   |
| 32 | Completed post-16 vocational course                          | 101 (3.3%)   |
| 33 | A-levels or equivalent (at school until aged 18)             | 403 (13.0%)  |
| 34 | Undergraduate degree or professional qualification           | 1306 (42.2%) |
| 35 | Postgraduate degree                                          | 976 (31.5%)  |
| 36 | Prefer not to say                                            | 26 (0.8%)    |
| 37 |                                                              |              |
| 38 | <b>Place of residence</b>                                    |              |
| 39 | South West England                                           | 241 (7.8%)   |
| 40 | East Midlands                                                | 762 (24.6%)  |
| 41 | Yorkshire and Humber                                         | 293 (9.5%)   |
| 42 | North East                                                   | 147 (4.8%)   |
| 43 | East of England                                              | 153 (4.9%)   |
| 44 | North West                                                   | 357 (11.5%)  |
| 45 | South East England                                           | 415 (13.4%)  |
| 46 | Greater London                                               | 329 (10.6%)  |
| 47 | West Midlands                                                | 165 (5.3%)   |
| 48 | Northern Ireland                                             | 8 (0.3%)     |
| 49 | Wales                                                        | 73 (2.4%)    |
| 50 | Scotland                                                     | 154 (5.0%)   |
| 51 |                                                              |              |
| 52 | <b>Key-worker status</b>                                     |              |
| 53 |                                                              |              |
| 54 |                                                              |              |
| 55 |                                                              |              |
| 56 |                                                              |              |
| 57 |                                                              |              |
| 58 |                                                              |              |
| 59 |                                                              |              |
| 60 |                                                              |              |

|                                                                                                                |              |
|----------------------------------------------------------------------------------------------------------------|--------------|
| Health, social care or relevant related support worker                                                         | 1198 (38.7%) |
| Teacher or childcare worker still travelling in to work                                                        | 70 (2.3%)    |
| Transport worker still travelling in to work                                                                   | 1 (0.03%)    |
| Food chain worker (e.g. production, sale, delivery)                                                            | 33 (1.1%)    |
| Key public services worker (e.g. justice staff, religious staff, public service journalist or mortuary worker) | 22 (0.7%)    |
| Local or national government worker delivering essential public services                                       | 41 (1.3%)    |
| Utility worker (e.g. energy, sewerage, postal service)                                                         | 5 (0.2%)     |
| Public safety or national security worker                                                                      | 11 (0.4%)    |
| Worker involved in medicines or protective equipment production or distribution                                | 10 (0.3%)    |
| Other key worker role not listed                                                                               | 168 (5.4%)   |
| Not a key worker                                                                                               | 1538 (49.7%) |
| <b>Living alone (or with others)</b>                                                                           |              |
| Living alone                                                                                                   | 406 (13.1%)  |
| Living with others                                                                                             | 2691 (86.9%) |
| <b>COVID-19 risk status</b>                                                                                    |              |
| Most at risk (e.g. suffering from advanced cancer, severe asthma/COPD, etc.)                                   | 121 (3.9%)   |
| At increased risk (e.g., being pregnant, aged over 70, etc.)                                                   | 528 (17.1%)  |
| Not at-risk                                                                                                    | 2448 (79.0%) |

### Mental health outcomes

Table 2 summarises findings in relation to levels of stress, anxiety and depression in the cohort. The mean values for all measures indicate levels that are higher in women than men and decrease with age. Overall mean values are significantly higher than previously reported population norms<sup>23-25</sup>. For both anxiety and depression the means for the cohort were higher for both genders compared with their respective population norms, and also for all age ranges between 25-64 years. In contrast, both men and women aged over 65 years had anxiety and depression scores consistent with previous population norms. The data suggested no significant differences in stress scores by gender, despite the combined mean score exceeding the population norm.

Table 3 shows the categorisation of participants in line with established cut-offs for anxiety and depression. This shows 64% of participants reported symptoms of depression and 57% reported symptoms of anxiety. When considering the thresholds at which someone would qualify for high intensity psychological support (score of 10 or greater) in the NHS,<sup>26</sup> we observe that 31.6% reported moderate to severe depression and 26% moderate to severe anxiety.

Table 2: Depression (PHQ-9), anxiety (GAD-7) and stress (PSS-4) scores and published population normative data†

|                           | PHQ-9 score  |            |                | GAD-7 score  |            |                | PSS-4 score  |            |                |
|---------------------------|--------------|------------|----------------|--------------|------------|----------------|--------------|------------|----------------|
|                           | Participants | Norms      | t              | Participants | Norms      | t              | Participants | Norms      | t              |
|                           | Mean (SD)    | Mean (SD)  |                | Mean (SD)    | Mean (SD)  |                | Mean (SD)    | Mean (SD)  |                |
| <b>Total Score</b>        | 7.69 (6.0)   | 2.91 (3.5) | 45.31****      | 6.59 (5.6)   | 2.95 (3.4) | 36.52****      | 6.48 (3.3)   | 6.11 (3.1) | 3.80****       |
| <b>Gender</b>             |              |            |                |              |            |                |              |            |                |
| Male                      | 6.49 (6.1)   | 2.7 (3.5)  | 18.56****      | 5.22 (5.4)   | 2.66 (3.2) | 13.77****      | 5.88 (3.3)   | 5.56 (3.0) | 1.57 (p=0.12)  |
| Female                    | 7.91 (6.0)   | 3.1 (3.5)  | 35.80****      | 6.84 (5.5)   | 3.20 (3.5) | 28.83****      | 6.59 (3.3)   | 6.38 (3.2) | 1.73 (p=0.084) |
| <b>Age groups (years)</b> |              |            |                |              |            |                |              |            |                |
| 18-24                     | 11.26 (6.4)  | ..         | ..             | 9.04 (5.9)   | ..         | ..             | 7.64 (3.3)   | ..         | ..             |
| 25-34                     | 8.74 (5.9)   | 2.3 (3.2)  | 22.46****      | 7.73 (5.6)   | 2.81 (3.3) | 13.85****      | 6.97 (3.3)   | ..         | ..             |
| 35-44                     | 8.24 (6.0)   | 2.6 (3.5)  | 23.48****      | 7.25 (5.7)   | 2.82 (3.3) | 14.09****      | 6.40 (3.1)   | ..         | ..             |
| 45-54                     | 7.34 (5.7)   | 2.8 (3.5)  | 19.31****      | 6.28 (5.3)   | 3.14 (3.4) | 10.71****      | 6.06 (3.1)   | ..         | ..             |
| 55-64                     | 6.32 (5.6)   | 3.2 (3.5)  | 12.90****      | 5.43 (5.1)   | 3.25 (3.6) | 7.36****       | 5.40 (3.1)   | ..         | ..             |
| 65-74                     | 3.81 (4.2)   | 3.3 (3.6)  | 1.88 (p=0.060) | 3.33 (3.8)   | 2.79 (3.2) | 1.95 (p=0.052) | 4.83 (2.9)   | ..         | ..             |
| ≥75                       | 4.69 (5.7)   | 4.4 (3.9)  | 0.29 (p=0.61)  | 3.26 (4.4)   | 3.05 (3.4) | 0.37 (p=0.71)  | 5.22 (3.1)   | ..         | ..             |

† PHQ-9, the 9-item Patient Health Questionnaire;<sup>19</sup> GAD-7, the 7-item Generalized Anxiety Disorder Scale;<sup>20</sup> PSS-4, the 4-item Perceived Stress Scale.<sup>21</sup> Published population normative data for PHQ-9<sup>23</sup>, GAD-7<sup>25</sup>, PSS-4<sup>24</sup>.

\*\*\*\* p<0.0001, \*\*\* p<0.001, \*\* p<0.01, \* p<0.05

**Table 3: Prevalence of depressive and anxiety cases<sup>†</sup>**

| Categories                            | Whole sample                                |      | Male |     | Female |      |      |
|---------------------------------------|---------------------------------------------|------|------|-----|--------|------|------|
|                                       | n                                           | %    | n    | %   | n      | %    |      |
| <b>Depression (PHQ-9<sup>‡</sup>)</b> | <i>No-Minimal Depression (0-4)</i>          | 1125 | 36.3 | 230 | 48.3   | 894  | 34.1 |
|                                       | <i>Mild Depression (5-9)</i>                | 994  | 32.1 | 125 | 26.3   | 868  | 33.2 |
|                                       | <i>Moderate Depression (10-14)</i>          | 525  | 17.0 | 64  | 13.4   | 461  | 17.6 |
|                                       | <i>Moderately Severe Depression (15-19)</i> | 276  | 8.9  | 35  | 7.4    | 241  | 9.2  |
|                                       | <i>Severe Depression (20-27)</i>            | 177  | 5.7  | 22  | 4.6    | 154  | 5.9  |
| <b>Anxiety (GAD-7<sup>‡</sup>)</b>    | <i>No-Minimal Anxiety (0-4)</i>             | 1344 | 43.4 | 276 | 58.0   | 1066 | 40.7 |
|                                       | <i>Mild Anxiety (5-9)</i>                   | 947  | 30.6 | 108 | 22.7   | 839  | 32.0 |
|                                       | <i>Moderate Anxiety (10-14)</i>             | 430  | 13.9 | 44  | 9.2    | 386  | 14.7 |
|                                       | <i>Severe Anxiety (15-21)</i>               | 376  | 12.1 | 48  | 10.1   | 327  | 12.5 |

<sup>†</sup> Cut-offs for categories in line with published guidelines for PHQ-9<sup>23</sup> and GAD-7.<sup>25</sup>

<sup>‡</sup> PHQ-9, the 9-item Patient Health Questionnaire;<sup>19</sup> GAD-7, the 7-item Generalized Anxiety Disorder Scale.<sup>20</sup>

### Individuals at greatest risk of mental health problems: associations with age, gender, ethnicity, living alone and key-worker status

When non-modifiable explanatory variables were included in a multivariable model (Table 4), we observed that for depression (square-root transformed scores), being younger ( $B=-0.28$ , 95% CI:  $-0.31$ ,  $-0.25$  per decade), female ( $B=0.36$ , 95% CI:  $0.25$ ,  $0.47$ ) and living alone ( $B=0.34$ , 95% CI:  $0.25$ ,  $0.47$ ) were all independently significantly associated with greater levels of depression. This model accounted for approximately 13% of the variance in depression scores. These results were replicated when considering depression as a binary outcome (i.e., cases requiring high intensity intervention versus not) with females having a 49% increased odds of depression and living alone associated with a 55% increase.

**Table 4: Regression models showing associations between non-modifiable explanatory variables and depression scores**

|                                            | B          | 95% CI Lower | 95% CI Upper | $\beta$ | p          |
|--------------------------------------------|------------|--------------|--------------|---------|------------|
| <b>PHQ-9 Total Score<sup>a</sup></b>       |            |              |              |         |            |
| Age (per decade)                           | -0.28      | -0.31        | -0.25        | -0.35   | <.0001**** |
| Female                                     | 0.36       | 0.25         | 0.47         | 0.11    | <.0001**** |
| Live alone                                 | 0.34       | 0.22         | 0.46         | 0.09    | <.0001**** |
| BAME background                            | 0.03       | -0.11        | 0.17         | 0.01    | .64        |
| Key-worker                                 | 0.06       | -0.02        | 0.14         | 0.02    | .15        |
| <b>Adjusted R<sup>2</sup>=0.13, n=3090</b> |            |              |              |         |            |
|                                            | Odds Ratio | 95% CI Lower | 95% CI Upper | $\beta$ | p          |
| <b>PHQ-9 "Cases"<sup>b</sup></b>           |            |              |              |         |            |
| Age (per decade)                           | 0.67       | 0.63         | 0.71         | -1.30   | <.0001**** |
| Female                                     | 1.49       | 1.18         | 1.89         | 0.31    | .00079***  |
| Live alone                                 | 1.55       | 1.23         | 1.97         | 0.32    | .00025**** |
| BAME background                            | 1.14       | 0.88         | 1.48         | 0.08    | .32        |
| Key-worker                                 | 1.14       | 0.97         | 1.33         | 0.14    | .11        |
| <b>Pseudo R<sup>2</sup>=0.06, n=3090</b>   |            |              |              |         |            |

\*\*\*\*  $p<0.0001$ , \*\*\*  $p<0.001$ , \*\*  $p<0.01$ , \*  $p<0.05$

<sup>a</sup> A square-root transformation was applied to the dependent variable.

<sup>b</sup> a "case" is defined as a PHQ-9 score greater than or equal to 10, at which level someone would qualify for high intensity psychological support in the NHS.

For anxiety (square-root transformed scores) being younger ( $B=-0.24$ , 95% CI:  $-0.27$ ,  $-0.22$  per decade) and female ( $B=0.43$ , 95% CI:  $0.32$ ,  $0.55$ ) were independently significantly associated with greater levels of anxiety (Table 5). This model accounted for approximately 11% of the variance and these results were replicated when considering anxiety as a binary outcome (i.e., cases requiring high intensity intervention versus not).

**Table 5: Regression models showing associations between non-modifiable explanatory variables and anxiety scores**

|                                            | B          | 95% CI Lower | 95% CI Upper | $\beta$ | p          |
|--------------------------------------------|------------|--------------|--------------|---------|------------|
| <b>GAD-7 Total Score<sup>a</sup></b>       |            |              |              |         |            |
| Age (per decade)                           | -0.24      | -0.27        | -0.22        | -0.30   | <.0001**** |
| Female                                     | 0.43       | 0.32         | 0.55         | 0.13    | <.0001**** |
| Live alone                                 | -0.03      | -0.15        | 0.09         | -0.01   | .64        |
| BAME background                            | 0.02       | -0.12        | 0.16         | 0.01    | .77        |
| Key-worker                                 | 0.08       | -0.00        | 0.16         | 0.03    | .06        |
| <b>Adjusted R<sup>2</sup>=0.11, n=3090</b> |            |              |              |         |            |
|                                            | Odds Ratio | 95% CI Lower | 95% CI Upper | $\beta$ | p          |
| <b>GAD-7 "Cases"<sup>b</sup></b>           |            |              |              |         |            |
| Age (per decade)                           | 0.70       | 0.66         | 0.74         | -1.23   | <.0001**** |
| Female                                     | 1.61       | 1.25         | 2.08         | 0.39    | 0.00020*** |
| Live alone                                 | 1.02       | 0.78         | 1.32         | 0.01    | .91        |
| BAME background                            | 1.15       | 0.88         | 1.51         | 0.10    | .30        |
| Key-worker                                 | 1.13       | 0.96         | 1.34         | 0.14    | .15        |
| <b>Pseudo R<sup>2</sup>=0.05, n=3090</b>   |            |              |              |         |            |

\*\*\*\*  $p < 0.0001$ , \*\*\*  $p < 0.001$ , \*\*  $p < 0.01$ , \*  $p < 0.05$

<sup>a</sup> A square-root transformation was applied to the dependent variable.

<sup>b</sup> a "case" is defined as a GAD-7 score greater than or equal to 10, at which level someone would qualify for high intensity psychological support in the NHS.

For stress, being younger ( $B = -0.54$ , 95% CI:  $-0.61, -0.46$  per decade), female ( $B = 0.78$ , 95% CI:  $0.46, 1.09$ ), living alone ( $B = 0.48$ , 95% CI:  $0.15, 0.82$ ), being from a BAME background ( $B = 0.45$ , 95% CI:  $0.07, 0.84$ ), were all independently significantly associated with greater stress; while being a key-worker was independently significantly associated with a lower stress ( $B = -0.24$ , 95% CI:  $-0.47, -0.02$ ). Together the model accounted for approximately 7% of the variance in stress scores (Table 6).

**Table 6: Regression model showing associations between non-modifiable explanatory variables and stress scores**

|                                            | B     | 95% CI Lower | 95% CI Upper | $\beta$ | p          |
|--------------------------------------------|-------|--------------|--------------|---------|------------|
| <b>PSS-4 Total Score</b>                   |       |              |              |         |            |
| Age (per decade)                           | -0.54 | -0.61        | -0.46        | -0.25   | <.0001**** |
| Female                                     | 0.78  | 0.46         | 1.09         | 0.09    | <.0001**** |
| Live alone                                 | 0.48  | 0.15         | 0.82         | 0.05    | 0.0049**   |
| BAME background                            | 0.45  | 0.07         | 0.84         | 0.04    | 0.022*     |
| Key-worker                                 | -0.24 | -0.47        | -0.02        | -0.04   | 0.033*     |
| <b>Adjusted R<sup>2</sup>=0.07, n=3090</b> |       |              |              |         |            |

\*\*\*\*  $p < 0.0001$ , \*\*\*  $p < 0.001$ , \*\*  $p < 0.01$ , \*  $p < 0.05$

### Individuals at greatest risk of mental health problems: associations with perceived risk of COVID-19, perceived loneliness, COVID-19 worry and positive mood

Table 7 shows levels of modifiable explanatory variables (perceived risk, perceived loneliness, COVID-19 worry, and positive mood) across the whole sample, as well as by gender and age-groups.



**Table 7: Loneliness, worry about COVID-19, perceived risk of COVID-19, and positive mood**

|                                   | Whole sample | Gender      |              | Age groups (years) |             |             |             |             |             |             |
|-----------------------------------|--------------|-------------|--------------|--------------------|-------------|-------------|-------------|-------------|-------------|-------------|
|                                   |              | Male        | Female       | 18-24              | 25-34       | 35-44       | 45-54       | 55-64       | 65-74       | ≥75         |
| <b>Loneliness</b>                 |              |             |              |                    |             |             |             |             |             |             |
| Mean (SD)                         | 3.86 (2.7)   | 3.56 (2.7)  | 3.91 (2.7)   | 5.36 (2.7)         | 4.36 (2.7)  | 3.76 (2.7)  | 3.62 (2.8)  | 3.47 (2.7)  | 2.70 (2.1)  | 2.71 (2.4)  |
| <b>Positive mood</b>              |              |             |              |                    |             |             |             |             |             |             |
| Mean (SD)                         | 18.99 (5.1)  | 19.76 (5.1) | 18.85 (5.0)  | 17.67 (4.9)        | 18.82 (5.1) | 18.67 (5.0) | 18.92 (5.1) | 19.38 (5.0) | 20.72 (4.6) | 21.56 (5.2) |
| <b>Perceived risk of COVID-19</b> |              |             |              |                    |             |             |             |             |             |             |
| Mean (SD)                         | 4.75 (2.2)   | 4.46 (2.2)  | 4.80 (2.2)   | 4.10 (2.0)         | 4.92 (2.2)  | 5.15 (2.2)  | 5 (2.2)     | 4.78 (2.3)  | 4.21 (2.1)  | 3.31 (1.9)  |
| <b>Worry about COVID-19</b>       |              |             |              |                    |             |             |             |             |             |             |
| No worry (n, %)                   | 512 (16.5%)  | 105 (22.1%) | 406 (15.5%)  | 105 (28.9%)        | 108 (20.5%) | 91 (14.3%)  | 91 (13.3%)  | 65 (11.4%)  | 39 (15.4%)  | 13 (21.0%)  |
| Occasional worry (n, %)           | 2050 (66.2%) | 318 (66.8%) | 1731 (66.1%) | 208 (57.3%)        | 320 (60.6%) | 427 (67.2%) | 466 (67.8%) | 396 (69.7%) | 188 (74.0%) | 45 (72.6%)  |
| Much worry (n, %)                 | 413 (13.3%)  | 40 (8.4%)   | 373 (14.3%)  | 39 (10.7%)         | 77 (14.6%)  | 91 (14.3%)  | 94 (13.7%)  | 85 (15.0%)  | 24 (9.5%)   | 3 (4.8%)    |
| Most worry (n, %)                 | 122 (3.9%)   | 13 (2.7%)   | 108 (4.1%)   | 11 (3.0%)          | 23 (4.4%)   | 26 (4.1%)   | 36 (5.2%)   | 22 (3.9%)   | 3 (1.2%)    | 1 (1.6%)    |

When modifiable explanatory variables were added into the multivariable model for depression: this revealed that greater perceived loneliness (B=0.10, 95% CI: 0.09, 0.12), lower positive mood (B=-0.12, 95% CI: -0.12, -0.11) and greater than occasional worry about getting COVID-19 (much of time: B=0.28, 95% CI: 0.18, 0.38; most of time: B=0.32, 95% CI: 0.13, 0.50), were all independently and significantly associated with greater levels of depression, in addition to age and gender. The model accounted for approximately 56% of the variance in depression scores. While perceived risk of COVID-19 was not statistically significant, in sensitivity analyses where large residuals were excluded ( $<-3/>3$ ) this became statistically significant (B=0.02, 95% CI: 0.00, 0.03). These results were largely replicated when considering depression as a binary outcome although gender was no longer statistically significant (Table 8).

**Table 8: Regression models showing associations between modifiable explanatory variables and depression scores**

|                                            | B          | 95% CI Lower | 95% CI Upper | $\beta$ | p           |
|--------------------------------------------|------------|--------------|--------------|---------|-------------|
| <b>PHQ-9 Total Score<sup>a</sup></b>       |            |              |              |         |             |
| Age (per decade)                           | -0.18      | -0.20        | -0.15        | -0.22   | <.0001****  |
| Female                                     | 0.18       | 0.09         | 0.27         | 0.05    | <.0001****  |
| Live alone                                 | 0.02       | -0.08        | 0.12         | 0.01    | 0.71        |
| BAME background                            | -0.03      | -0.14        | 0.08         | -0.01   | 0.61        |
| Key-worker                                 | 0.01       | -0.06        | 0.08         | 0.00    | 0.84        |
| Perceived loneliness (per unit)            | 0.10       | 0.09         | 0.12         | 0.23    | <.0001****  |
| Positive mood (per unit)                   | -0.12      | -0.12        | -0.11        | -0.48   | <.0001****  |
| COVID-19 worry <sup>b</sup>                |            |              |              |         |             |
| No worry                                   | -0.01      | -0.10        | 0.09         | -0.00   | 0.89        |
| Much of time                               | 0.28       | 0.18         | 0.38         | 0.08    | <.0001****  |
| Most of time                               | 0.32       | 0.13         | 0.50         | 0.05    | 0.00067**** |
| Perceived risk of COVID-19 (per unit)      | 0.01       | -0.00        | 0.03         | 0.02    | 0.13        |
| <b>Adjusted R<sup>2</sup>=0.56, n=2494</b> |            |              |              |         |             |
|                                            | Odds Ratio | 95% CI Lower | 95% CI Upper | $\beta$ | p           |
| <b>PHQ-9 "Cases"<sup>c</sup></b>           |            |              |              |         |             |
| Age (per decade)                           | 0.68       | 0.63         | 0.74         | -1.30   | <.0001****  |
| Female                                     | 1.06       | 0.76         | 1.47         | 0.04    | 0.75        |
| Live alone                                 | 0.88       | 0.61         | 1.25         | -0.10   | 0.46        |
| BAME background                            | 0.95       | 0.65         | 1.39         | -0.03   | 0.79        |
| Key-worker                                 | 1.07       | 0.85         | 1.36         | 0.08    | 0.57        |
| Perceived loneliness (per unit)            | 1.22       | 1.17         | 1.28         | 1.20    | <.0001****  |
| Positive mood (per unit)                   | 0.76       | 0.74         | 0.79         | -3.02   | <.0001****  |
| COVID-19 worry <sup>b</sup>                |            |              |              |         |             |
| No worry                                   | 1.00       | 0.71         | 1.41         | 0.00    | 0.98        |
| Much of time                               | 1.74       | 1.28         | 2.36         | 0.41    | 0.00037**** |
| Most of time                               | 2.08       | 1.17         | 3.72         | 0.30    | 0.013*      |
| Perceived risk of COVID-19 (per unit)      | 1.04       | 0.98         | 1.09         | 0.17    | 0.23        |
| <b>Pseudo R<sup>2</sup>=0.35, n=2494</b>   |            |              |              |         |             |

\*\*\*\*  $p < 0.0001$ , \*\*\*  $p < 0.001$ , \*\*  $p < 0.01$ , \*  $p < 0.05$

<sup>a</sup> A square-root transformation was applied to the dependent variable.

<sup>b</sup> Comparison reference group "I occasionally worry about getting COVID-19".

<sup>c</sup> a "case" is defined as a PHQ-9 score greater than or equal to 10, at which level someone would qualify for high intensity psychological support in the NHS.

For anxiety, the model revealed that greater perceived loneliness (B=0.06, 95% CI: 0.04, 0.07), lower positive mood (B=-0.12, 95% CI: -0.13, -0.11) and greater perceived risk of COVID-19 (B=0.04, 95% CI: 0.02, 0.05) were all independently and significantly associated with greater anxiety, in addition to the non-modifiable

factors of being younger, female and living alone. Further, those participants who experienced greater than occasional worry about getting COVID-19 were significantly more likely to have higher levels of anxiety (much of time:  $B=0.58$ , 95% CI: 0.47, 0.68; most of time:  $B=0.87$ , 95% CI: 0.68, 1.06); with those who did not worry at all about getting COVID-19 being likely to have lower anxiety ( $B=-0.19$ , 95% CI: -0.28, -0.09). The model accounted for approximately 54% of the variance in anxiety scores. These results were largely replicated when considering anxiety as a binary outcome, although gender and not worrying at all about getting COVID-19 were no longer statistically significant (Table 9).

**Table 9: Regression models showing associations between modifiable explanatory variables and anxiety**

|                                            | B          | 95% CI Lower | 95% CI Upper | $\beta$ | p          |
|--------------------------------------------|------------|--------------|--------------|---------|------------|
| <b>GAD-7 Total Score<sup>a</sup></b>       |            |              |              |         |            |
| Age (per decade)                           | -0.16      | -0.18        | -0.13        | -0.19   | <0001****  |
| Female                                     | 0.25       | 0.15         | 0.34         | 0.07    | <0001****  |
| Live alone                                 | -0.25      | -0.35        | -0.15        | -0.07   | <0001****  |
| BAME background                            | -0.08      | -0.20        | 0.03         | -0.02   | 0.17       |
| Key-worker                                 | -0.04      | -0.11        | 0.03         | -0.02   | 0.27       |
| Perceived loneliness (per unit)            | 0.06       | 0.04         | 0.07         | 0.12    | <0001****  |
| Positive mood (per unit)                   | -0.12      | -0.13        | -0.11        | -0.48   | <0001****  |
| COVID-19 worry <sup>b</sup>                |            |              |              |         |            |
| No worry                                   | -0.19      | -0.28        | -0.09        | -0.05   | 0.00015*** |
| Much of time                               | 0.58       | 0.47         | 0.68         | 0.16    | <0001****  |
| Most of time                               | 0.87       | 0.68         | 1.06         | 0.13    | <0001****  |
| Perceived risk of COVID-19 (per unit)      | 0.04       | 0.02         | 0.05         | 0.06    | <0001****  |
| <b>Adjusted R<sup>2</sup>=0.54, n=2494</b> |            |              |              |         |            |
|                                            | Odds Ratio | 95% CI Lower | 95% CI Upper | $\beta$ | p          |
| <b>GAD-7 "Cases"<sup>c</sup></b>           |            |              |              |         |            |
| Age (per decade)                           | 0.69       | 0.63         | 0.75         | -1.34   | <0001****  |
| Female                                     | 1.17       | 0.82         | 1.67         | 0.14    | 0.37       |
| Live alone                                 | 0.67       | 0.46         | 0.99         | -0.32   | 0.044*     |
| BAME background                            | 0.96       | 0.65         | 1.43         | -0.03   | 0.85       |
| Key-worker                                 | 0.90       | 0.70         | 1.15         | -0.13   | 0.40       |
| Perceived loneliness (per unit)            | 1.11       | 1.06         | 1.17         | 0.67    | <0001****  |
| Positive mood (per unit)                   | 0.77       | 0.75         | 0.80         | -3.07   | <0001****  |
| COVID-19 worry <sup>b</sup>                |            |              |              |         |            |
| No worry                                   | 0.75       | 0.52         | 1.09         | -0.24   | 0.14       |
| Much of time                               | 3.86       | 2.86         | 5.22         | 1.06    | <0001****  |
| Most of time                               | 11.57      | 5.88         | 22.77        | 1.06    | <0001****  |
| Perceived risk of COVID-19 (per unit)      | 1.07       | 1.01         | 1.14         | 0.35    | 0.024*     |
| <b>Pseudo R<sup>2</sup>=0.36, n=2494</b>   |            |              |              |         |            |

\*\*\*\*  $p<0.0001$ , \*\*\*  $p<0.001$ , \*\*  $p<0.01$ , \*  $p<0.05$

<sup>a</sup> A square-root transformation was applied to the dependent variable.

<sup>b</sup> Comparison reference group "I occasionally worry about getting COVID-19".

<sup>c</sup> a "case" is defined as a GAD-7 score greater than or equal to 10, at which level someone would qualify for high intensity psychological support in the NHS.

The multivariable model for stress scores showed that greater perceived loneliness ( $B=0.19$ , 95% CI: 0.15, 0.23), lower positive mood ( $B=-0.38$ , 95% CI: -0.40, -0.36), greater than occasional worry about getting COVID-19 (much of time:  $B=0.37$ , 95% CI: 0.10, 0.63; most of time:  $B=1.02$ , 95% CI: 0.54, 1.50), and greater perceived risk of getting COVID-19 ( $B=0.06$ , 95% CI: 0.02, 0.11) were all independently and significantly associated with greater stress, in addition to being younger, female, living alone and not being a key-worker. In

robustness analyses, when removing large residuals (<-3 or >3) having a BAME background was also a statistically significant independent predictor (B=0.29, 95% CI: 0.00, 0.58). This model accounted for approximately 57% of the variance in stress scores (Table 10).

**Table 10: Regression model showing associations between modifiable explanatory variables and stress scores**

|                                       | B     | 95% CI Lower | 95% CI Upper | $\beta$ | p          |
|---------------------------------------|-------|--------------|--------------|---------|------------|
| <b>PSS-4 Total Score</b>              |       |              |              |         |            |
| Age (per decade)                      | -0.24 | -0.30        | -0.18        | -0.11   | <.0001**** |
| Female                                | 0.35  | 0.12         | 0.59         | 0.04    | 0.0035**   |
| Live alone                            | -0.41 | -0.67        | -0.14        | -0.04   | 0.0025**   |
| BAME background                       | 0.26  | -0.04        | 0.55         | 0.02    | 0.088      |
| Key-worker                            | -0.40 | -0.58        | -0.21        | -0.06   | <.0001**** |
| Perceived loneliness (per unit)       | 0.19  | 0.15         | 0.23         | 0.15    | <.0001**** |
| Positive mood (per unit)              | -0.38 | -0.40        | -0.36        | -0.60   | <.0001**** |
| COVID-19 worry <sup>a</sup>           |       |              |              |         |            |
| No worry                              | -0.05 | -0.30        | 0.19         | -0.01   | 0.67       |
| Much of time                          | 0.37  | 0.10         | 0.63         | 0.04    | 0.0068**   |
| Most of time                          | 1.02  | 0.54         | 1.50         | 0.06    | <.0001**** |
| Perceived risk of COVID-19 (per unit) | 0.06  | 0.02         | 0.11         | 0.04    | 0.0037**   |

Adjusted R<sup>2</sup>=.57, n=2494

\*\*\*\*  $p < 0.0001$ , \*\*\*  $p < 0.001$ , \*\*  $p < 0.01$ , \*  $p < 0.05$

<sup>a</sup> Comparison reference group "I occasionally worry about getting COVID-19".

## Discussion

We report findings from a community cohort study established in the UK to examine the mental health consequences of the COVID-19 pandemic. Our results pertain to the experiences of people within the first four to six weeks of social distancing measures being introduced, and focus on self-reported depression, anxiety and stress scores. The findings indicated that mean levels of depression, anxiety and stress significantly exceeded recent population norms.<sup>23-25</sup> Models examining the relationship between these mental health outcomes and non-modifiable explanatory factors accounted for only a modest proportion of the variance (7-13%). Increased depression was associated with being younger, female and living alone; increased anxiety was associated with being younger and female; and increased stress was associated with being younger, female, living alone, being from a BAME background and not being a keyworker. In contrast, when we added the hypothesised modifiable variables into our multivariable models we observed that they accounted for a much larger proportion of the variance (54-57%) with significant independent effects emerging for positive mood, perceived loneliness and worry about getting COVID-19 for all three outcomes, as well as perceived risk of COVID-19 emerging as significant for anxiety and stress.

These findings highlight a number of issues worthy of discussion. First, both mean scores and measures of case-

1  
2  
3 being of people in the UK. This is true for depression, generalised anxiety disorder and stress and is in keeping  
4 with observations from other countries.<sup>2,3</sup> Indeed, the proportion of participants who would require intensive  
5 support for depression and anxiety in the NHS does not compare favourably with recent historical estimates of  
6 the prevalence of mental health problems in the UK. For example, the 2014 ONS report on adult psychiatric  
7 morbidity reported a prevalence of 17% for six different common mental disorders.<sup>27</sup> The prevalence of  
8 depression alone in the context of this pandemic is almost double this.

9  
10  
11  
12  
13  
14 Second, the non-modifiable explanatory variables significantly associated with all three of our mental health  
15 outcomes were being younger and being female. These findings are consistent with unpublished data from  
16 another UK community cohort recruited during the COVID-19 pandemic with a similar gender profile to our  
17 own,<sup>28</sup> suggesting that these groups may be the most in need of intervention. Although this runs counter to our  
18 hypothesis that the greatest psychological morbidity would be observed in individuals at greatest risk of  
19 COVID-19, it is consistent with previous work which has shown that individual's perceptions of disease risk are  
20 often poorly related to actual risk.<sup>29</sup> Alternatively, the results may reflect the fact that the pandemic has resulted  
21 in a panoply of challenges to mental health that go beyond the disease itself. It could be hypothesised, for  
22 example, that some of the more immediate consequences such as unemployment, financial concerns and  
23 increased domestic violence would disproportionately affect younger people and women and this may explain  
24 our findings.

25  
26  
27  
28  
29  
30  
31  
32  
33  
34  
35 A third, and related issue, is that although being younger and female were consistently associated with poorer  
36 mental health, the relationship was modest, accounting for, at best, 13% of the variance. In contrast, the  
37 modifiable explanatory measures when added to the multivariable models accounted for 52-57% of the variance.  
38 These findings are encouraging as they suggest that there is considerable potential for us to develop  
39 interventions to mitigate the mental health effects of the pandemic. The measures of perceived loneliness,  
40 positive mood and worry about getting COVID-19 were strongly associated with all three outcomes and thus  
41 would be appropriate cognitions to be targeted in future interventions.<sup>30</sup>

42  
43  
44  
45  
46  
47  
48  
49  
50  
51  
52  
53  
54  
55  
56  
57  
58  
59  
60  
A further issue concerns the effects of the pandemic beyond mental health. It is well known that when negative  
mood states persist over time they result in the dysregulation of physiological systems involved in the regulation  
of the immune system.<sup>31</sup> Thus, there exists significant potential for the psychological harm inflicted by the  
pandemic to translate into physical harm. This could include an increased susceptibility to the virus, worse  
outcomes if infected, or indeed poorer responses to vaccinations in the future.<sup>32</sup> Studies providing longitudinal

1  
2  
3 data on the prevalence of psychological morbidity and appropriate biomarkers (e.g., cortisol) will be required to  
4 determine whether the risks to physical health go beyond the hypothetical.  
5

6  
7 Finally, we would like to acknowledge several limitations. These include the cross-sectional design of the work  
8 which impedes an analysis of cause and effect; the limited generalisability of our cohort inflicted by the self-  
9 selected community cohort design and the absence of information on pre-existing mental health conditions  
10 which are likely to impact on the severity and prevalence of psychological morbidity.<sup>1</sup> Nonetheless, we are  
11 among the first to provide evidence from a large cohort on the mental health impact of the COVID-19 pandemic  
12 on people in the UK; to identify groups who may be at particular risk, as well as potential targets for therapeutic  
13 intervention.  
14  
15  
16  
17  
18  
19  
20  
21  
22  
23  
24  
25  
26  
27  
28  
29  
30  
31  
32  
33  
34  
35  
36  
37  
38  
39  
40  
41  
42  
43  
44  
45  
46  
47  
48  
49  
50  
51  
52  
53  
54  
55  
56  
57  
58  
59  
60

### Contributor statements

**Ru Jia:** study design, coordination and management of recruitment, preparation, analysis and interpretation of data, preparation and review of final manuscript.

**Kieran Ayling:** study design, coordination and management of recruitment, preparation, analysis and interpretation of data preparation and review of final manuscript.

**Trudie Chalder:** study design, analysis and interpretation of data preparation and review of final manuscript.

**Adam Massey:** study design, coordination and management of recruitment, preparation, analysis and interpretation of data and review of final manuscript.

**Elizabeth Broadbent:** study design, interpretation of data and review of final manuscript

**Carol Coupland:** study design, analysis and interpretation of data, preparation and review of final manuscript

**Kavita Vedhara:** research lead and overall guarantor for the article contributing to study design, coordination and management of recruitment, preparation, analysis and interpretation of data and preparation of manuscript.

As corresponding author, KV had access to all the data in the study and had final responsibility for the decision to submit for publication.

### No competing interests

All authors have completed the ICMJE uniform disclosure form at [www.icmje.org/coi\\_disclosure.pdf](http://www.icmje.org/coi_disclosure.pdf) and declare: no support from any organisation for the submitted work; no financial relationships with any organisations that might have an interest in the submitted work in the previous three years; no other relationships or activities that could appear to have influenced the submitted work.

### Acknowledgements and Funding

KA was supported by funding from the National Institute for Health Research School for Primary Care Research (NIHR SPCR). The views expressed are those of the author(s) and not necessarily those of the NIHR, the NHS or the Department of Health.

TC acknowledges the financial support of the Department of Health via the National Institute for Health Research (NIHR) Specialist Biomedical Research Centre for Mental Health award to the South London and Maudsley NHS Foundation Trust (SLaM) and the Institute of Psychiatry at King's College London. The views expressed are those of the authors and not necessarily those of the NHS, the NIHR or the Department of Health and Social Care. No other funding supported the work described in this manuscript.

### **Transparency declaration**

The lead author affirms that this manuscript is an honest, accurate, and transparent account of the study being reported; that no important aspects of the study have been omitted; and that any discrepancies from the study as planned have been explained.

### **Data sharing**

Data will be deposited in the University of Nottingham data archive. Access to this dataset will be embargoed for a period of 12 months to permit planned analyses of the dataset. After that it may be shared with the consent of the Chief Investigator. Extra data is available by contacting [kavita.vedhara@nottingham.ac.uk](mailto:kavita.vedhara@nottingham.ac.uk).

### **Dissemination statement**

We plan to disseminate results to study participants



## References

1. Holmes EA, O'Connor RC, Perry VH, et al. Multidisciplinary research priorities for the COVID-19 pandemic: a call for action for mental health science [published online ahead of print, 2020 Apr 15]. *Lancet Psychiatry*. 2020;S2215-0366(20)30168-1. doi:10.1016/S2215-0366(20)30168-1
2. Liu S, Yang L, Zhang C *et al*. Online mental health services in China during the COVID-19 outbreak. *Lancet Psychiatry* 2020; **18**:e17–e18 doi.org/10.1016/S2215-0366(20)30077-8
3. Tian F, Li H, Tian S, Yang J, Shao J, Tian C. Psychological symptoms of ordinary Chinese citizens based on SCL-90 during the level I emergency response to COVID-19 [published online ahead of print, 2020 Apr 11]. *Psychiatry Res*. 2020; 288-112992. doi:10.1016/j.psychres.2020.112992
4. Jeong H, Yim HW, Song YJ, et al. Mental health status of people isolated due to Middle East Respiratory Syndrome. *Epidemiol Health*. 2016; 38:e2016048. Published 2016 Nov 5. doi:10.4178/epih.e2016048
5. Chan SM, Chiu FK, Lam CW, Leung PY, Conwell Y. Elderly suicide and the 2003 SARS epidemic in Hong Kong. *Int J Geriatr Psychiatry*. 2006; **21** (2):113–118. doi:10.1002/gps.1432
6. Williams SN, Armitage CJ, Tampe T, Dienes K. Public perceptions and experiences of social distancing and social isolation during the COVID-19 pandemic: A UK-based focus group study. medRxiv 2020 doi: <https://doi.org/10.1101/2020.04.10.20061267> (preprint)
7. <https://www.ons.gov.uk/peoplepopulationandcommunity/healthandsocialcare/causesofdeath/bulletins/coronaviruscovid19relateddeathsbyoccupationenglandandwales/deathsregistereduptoandincloding20april2020> [accessed 11/05/20]
8. Zhou F, Yu T, Du R, et al. Clinical course and risk factors for mortality of adult inpatients with COVID-19 in Wuhan, China: a retrospective cohort study; [published correction appears in *Lancet*. 2020 Mar 28;395(10229):1038]. *Lancet*. 2020; **395** (10229):1054-1062. doi:10.1016/S0140-6736(20)30566-3
9. Khunti K, Singh AK, Pareek M, Hanif W. Is ethnicity linked to incidence or outcomes of covid-19? *BMJ*. 2020; 369:m1548. Published 2020 Apr 20. doi:10.1136/bmj.m1548
10. Folkman S. 1997. Positive psychological states and coping with severe stress. *Soc. Sci. Med.* **45**:1207–21

- 1  
2  
3 11. Bults M, Beaujean DJ, de Zwart O, et al. Perceived risk, anxiety, and behavioural responses of the  
4  
5 general public during the early phase of the Influenza A (H1N1) pandemic in the Netherlands: results  
6  
7 of three consecutive online surveys. *BMC Public Health*. 2011; 11:2. Published 2011 Jan 3.  
8  
9 doi:10.1186/1471-2458-11-2.
- 10  
11 12. Salkovskis PM, Rimes KA, Warwick HM, Clark DM. The Health Anxiety Inventory: development and  
12  
13 validation of scales for the measurement of health anxiety and hypochondriasis. *Psychol Med*. 2002;  
14  
15 **32**(5):843-853. doi:10.1017/s0033291702005822
- 16  
17 13. Gao J, Zheng P, Jia Y, et al. Mental health problems and social media exposure during COVID-19  
18  
19 outbreak. *PLoS One*. 2020; **15**(4):e0231924. Published 2020 Apr 16. doi:10.1371/journal.pone.0231924
- 20  
21 14. Wang J, Mann F, Lloyd-Evans B, Ma R, Johnson S. Associations between loneliness and perceived  
22  
23 social support and outcomes of mental health problems: a systematic review. *BMC Psychiatry*. 2018;  
24  
25 **18**(1):156. Published 2018 May 29. doi:10.1186/s12888-018-1736-5
- 26  
27 15. Leigh-Hunt N, Bagguley D, Bash K, Turner V, Turnbull S, Valtorta N, Caan W. An overview of  
28  
29 systematic reviews on the public health consequences of social isolation and loneliness. *Public Health*.  
30  
31 2017 Nov; **152**:157-171. doi: 10.1016/j.puhe.2017.07.035.
- 32  
33 16. Pressman SD, Jenkins BN, Moskowitz JT. Positive Affect and Health: What Do We Know and Where  
34  
35 Next Should We Go? *Ann Rev Psychol*. 2019; **70**:627-650. doi:10.1146/annurev-psych-010418-102955
- 36  
37 17. Schotanus-Dijkstra M, ten Have M, Lamers SMA, de Graaf R, Bohlmeijer ET. The longitudinal  
38  
39 relationship between flourishing mental health and incident mood, anxiety and substance use disorders.  
40  
41 *Eur J Public Health*. 2017; **27**(3):563-568. doi:10.1093/eurpub/ckw202
- 42  
43 18. Schotanus-Dijkstra M, Keyes CLM, de Graaf R, ten Have M. Recovery from mood and anxiety  
44  
45 disorders: The influence of positive mental health. *J Affect Disord*. 2019; **252**:107-113.  
46  
47 doi:10.1016/j.jad.2019.04.051
- 48  
49 19. Kroenke K, Spitzer RL, Williams JB, Lowe B. The Patient Health Questionnaire Somatic, Anxiety, and  
50  
51 Depressive Symptom Scales: a systematic review. *Gen Hosp Psychiatry*. 2010;**32**(4):345–59
- 52  
53 20. Spitzer RL, Kroenke K, Williams JB, Löwe B. A brief measure for assessing generalized anxiety  
54  
55 disorder: the GAD-7. *Arch Intern Med*. 2006; **166**(10):1092–1097. doi:10.1001/archinte.166.10.1092
- 56  
57 21. Cohen S, Williamson G. (1988). Perceived Stress in a Probability Sample of the United States. In S.  
58  
59 Spacapan & S. Oskamp (Eds.), *The social psychology of health: Claremont Symposium on Applied*  
60  
*Social Psychology* (pp. 31–67). Newbury Park, CA: Sage.

- 1  
2  
3 22. Diener E., Wirtz D, Tov W, et al. (2010). New well-being measures: Short scales to assess flourishing,  
4 positive, and negative feelings. *Social Indicators Research*, **97**(2), 143–156.  
5  
6 <https://doi.org/10.1007/s11205-009-9493-y>  
7  
8  
9 23. Kocalevent RD, Hinz A, Brähler E. Standardization of the depression screener patient health  
10 questionnaire (PHQ-9) in the general population. *Gen Hosp Psychiatry*. 2013; **35** (5):551-555.  
11  
12 doi:10.1016/j.genhosppsy.2013.04.006  
13  
14 24. Warttig SL, Forshaw MJ, South J, White AK. New, normative, English-sample data for the Short Form  
15 Perceived Stress Scale (PSS-4). *J Health Psychol*. 2013; **18**(12):1617-1628.  
16  
17 doi:10.1177/1359105313508346  
18  
19 25. Löwe B, Decker O, Müller S, et al. Validation and standardization of the Generalized Anxiety Disorder  
20 Screener (GAD-7) in the general population. *Med Care*. 2008; **46** (3):266-274.  
21  
22 doi:10.1097/MLR.0b013e318160d093.  
23  
24 26. [https://www.rcpsych.ac.uk/docs/default-source/improving-care/nccmh/iapt/the-iapt-manual--final--](https://www.rcpsych.ac.uk/docs/default-source/improving-care/nccmh/iapt/the-iapt-manual--final--republished-7-3-18.pdf?sfvrsn=a192d1af_0)  
25  
26 [republished-7-3-18.pdf?sfvrsn=a192d1af\\_0](https://www.rcpsych.ac.uk/docs/default-source/improving-care/nccmh/iapt/the-iapt-manual--final--republished-7-3-18.pdf?sfvrsn=a192d1af_0) [accessed 5/5/20]  
27  
28  
29 27. [https://files.digital.nhs.uk/pdf/q/3/mental\\_health\\_and\\_wellbeing\\_in\\_england\\_full\\_report.pdf](https://files.digital.nhs.uk/pdf/q/3/mental_health_and_wellbeing_in_england_full_report.pdf) [accessed  
30  
31 03/05/20]  
32  
33 28. <https://www.marchnetwork.org/research> [accessed 04/05/20]  
34  
35 29. Westhoff CL. Breast cancer risk: perception versus reality. *Contraception*. 1999; **59** (1 Suppl):25S-28S.  
36  
37 doi:10.1016/s0010-7824(98)00134-6  
38  
39 30. Masi CM, Chen HY, Hawkley LC, Cacioppo JT. A meta-analysis of interventions to reduce loneliness.  
40  
41 *Per Soc Psychol Rev*. 2011; **15** (3):219-266. doi:10.1177/1088868310377394  
42  
43 31. O'Connor D, Thayer J, Vedhara K. Stress and Health: A Review of Psychobiological Processes.  
44  
45 *Annual Review of Psychology* (in press).  
46  
47 32. [https://thepsychologist.bps.org.uk/we-will-have-live-risk-covid-19-psychology-has-much-say-about-](https://thepsychologist.bps.org.uk/we-will-have-live-risk-covid-19-psychology-has-much-say-about-risk)  
48  
49 [risk](https://thepsychologist.bps.org.uk/we-will-have-live-risk-covid-19-psychology-has-much-say-about-risk) [accessed 06/05/2020]  
50  
51  
52  
53  
54  
55  
56  
57  
58  
59  
60

## Supplementary Appendices

Appendix 1: Results from univariable regressions

Appendix 2: Multivariable regression models, excluding perceived risk of COVID-19

Appendix 3: Details of characteristics and measures

Appendix 4: Boxplots of outcome variables

### Appendix 1: Results from univariable regressions

#### 1.1 Depression (PHQ-9)

**Table S1: Univariable regression coefficients for non-modifiable factors as predictors of depression scores**

| PHQ-9 Total Score<br>(Square-Root<br>Transformed) | Coefficient<br>(Standard Error) |
|---------------------------------------------------|---------------------------------|---------------------------------|---------------------------------|---------------------------------|---------------------------------|
| Age (per decade)                                  | -0.27****<br>(0.01)             |                                 |                                 |                                 |                                 |
| Female                                            |                                 | 0.37****<br>(0.06)              |                                 |                                 |                                 |
| Live alone                                        |                                 |                                 | 0.14*<br>(0.06)                 |                                 |                                 |
| BAME background                                   |                                 |                                 |                                 | 0.23**<br>(0.07)                |                                 |
| Key-worker                                        |                                 |                                 |                                 |                                 | 0.12**<br>(0.04)                |
| Constant                                          | 3.68****<br>(0.06)              | 2.18****<br>(0.06)              | 2.47****<br>(0.02)              | 2.47****<br>(0.02)              | 2.43****<br>(0.03)              |

\*\*\*\*  $p < 0.0001$ , \*\*\*  $p < 0.001$ , \*\*  $p < 0.01$ , \*  $p < 0.05$

**Table S2: Univariable regression coefficients for modifiable factors as predictors of depression scores**

| PHQ-9 Total Score<br>(Square-Root<br>Transformed) | Coefficient<br>(Standard Error) | Coefficient<br>(Standard Error) | Coefficient<br>(Standard Error) | Coefficient<br>(Standard Error) |
|---------------------------------------------------|---------------------------------|---------------------------------|---------------------------------|---------------------------------|
| Perceived loneliness                              | 0.25****<br>(0.01)              |                                 |                                 |                                 |
| Positive mood                                     |                                 | -0.16****<br>(0.00)             |                                 |                                 |
| COVID-19 worry <sup>a</sup>                       |                                 |                                 |                                 |                                 |
| No worry                                          |                                 |                                 | 0.00<br>(0.06)                  |                                 |
| Much of time                                      |                                 |                                 | 0.83****<br>(0.06)              |                                 |
| Most of time                                      |                                 |                                 | 1.33****<br>(0.11)              |                                 |
| Perceived risk of<br>COVID-19                     |                                 |                                 |                                 | 0.08****<br>(0.01)              |
| Constant                                          | 1.55****<br>(0.03)              | 5.53****<br>(0.06)              | 2.33****<br>(0.03)              | 2.03****<br>(0.06)              |

\*\*\*\*  $p < 0.0001$ , \*\*\*  $p < 0.001$ , \*\*  $p < 0.01$ , \*  $p < 0.05$

<sup>a</sup> Comparison reference group "I occasionally worry about getting COVID-19"

**Table S3: Univariable logistic regression coefficients for non-modifiable factors as predictors of depression cases <sup>a</sup>**

| PHQ-9 "Cases"    | Odds Ratio<br>[95% CI]   |
|------------------|--------------------------|--------------------------|--------------------------|--------------------------|--------------------------|
| Age (per decade) | 0.68****<br>[0.65, 0.72] |                          |                          |                          |                          |
| Female           |                          | 1.43**<br>[1.14, 1.78]   |                          |                          |                          |
| Live alone       |                          |                          | 1.15<br>[0.92, 1.43]     |                          |                          |
| BAME background  |                          |                          |                          | 1.49**<br>[1.17, 1.91]   |                          |
| Key-worker       |                          |                          |                          |                          | 1.16<br>[1.00, 1.35]     |
| Constant         | 2.37****<br>[1.86, 3.03] | 0.34****<br>[0.28, 0.42] | 0.45****<br>[0.42, 0.49] | 0.44****<br>[0.41, 0.48] | 0.43****<br>[0.38, 0.48] |

\*\*\*\*  $p < 0.0001$ , \*\*\*  $p < 0.001$ , \*\*  $p < 0.01$ , \*  $p < 0.05$

<sup>a</sup> a "case" is defined as a PHQ-9 score greater than or equal to 10, at which level someone would qualify for high intensity psychological support in the NHS

**Table S4: Univariable logistic regression coefficients for modifiable factors as predictors of depression cases <sup>a</sup>**

| PHQ-9 "Cases"               | Odds Ratio<br>[95% CI]   | Odds Ratio<br>[95% CI]        | Odds Ratio<br>[95% CI]    | Odds Ratio<br>[95% CI]   |
|-----------------------------|--------------------------|-------------------------------|---------------------------|--------------------------|
| Perceived loneliness        | 1.46****<br>[1.42, 1.51] |                               |                           |                          |
| Positive mood               |                          | 0.72****<br>[0.70, 0.74]      |                           |                          |
| COVID-19 worry <sup>b</sup> |                          |                               |                           |                          |
| No worry                    |                          |                               | 1.04<br>[0.84, 1.29]      |                          |
| Much of time                |                          |                               | 2.97****<br>[2.39, 3.69]  |                          |
| Most of time                |                          |                               | 8.27****<br>[5.44, 12.58] |                          |
| Perceived risk of COVID-19  |                          |                               |                           | 1.12****<br>[1.08, 1.16] |
| Constant                    | 0.09****<br>[0.08, 0.11] | 156.94****<br>[99.53, 247.47] | 0.35****<br>[0.32, 0.39]  | 0.24****<br>[0.20, 0.30] |

\*\*\*\*  $p < 0.0001$ , \*\*\*  $p < 0.001$ , \*\*  $p < 0.01$ , \*  $p < 0.05$

<sup>a</sup> a "case" is defined as a PHQ-9 score greater than or equal to 10, at which level someone would qualify for high intensity psychological support in the NHS

<sup>b</sup> Comparison reference group "I occasionally worry about getting COVID-19"

## 1.2 Anxiety (GAD-7)

**Table S5: Univariable regression coefficients for non-modifiable factors as predictors of anxiety scores**

| GAD-7 Total Score (Square-Root Transformed) | Coefficient (Standard Error) |
|---------------------------------------------|------------------------------|------------------------------|------------------------------|------------------------------|------------------------------|
| Age (per decade)                            | -0.24****<br>(0.01)          |                              |                              |                              |                              |
| Female                                      |                              | 0.45****<br>(0.06)           |                              |                              |                              |
| Live alone                                  |                              |                              | -0.21**<br>(0.07)            |                              |                              |
| BAME background                             |                              |                              |                              | 0.17*<br>(0.08)              |                              |
| Key-worker                                  |                              |                              |                              |                              | 0.15***<br>(0.04)            |
| Constant                                    | 3.34****<br>(0.07)           | 1.87****<br>(0.06)           | 2.28****<br>(0.02)           | 2.23****<br>(0.02)           | 2.17****<br>(0.03)           |

\*\*\*\*  $p < 0.0001$ , \*\*\*  $p < 0.001$ , \*\*  $p < 0.01$ , \*  $p < 0.05$

**Table S6: Univariable regression coefficients for modifiable factors as predictors of anxiety scores**

| GAD-7 Total Score (Square-Root Transformed) | Coefficient (Standard Error) | Coefficient (Standard Error) | Coefficient (Standard Error) | Coefficient (Standard Error) |
|---------------------------------------------|------------------------------|------------------------------|------------------------------|------------------------------|
| Perceived loneliness                        | 0.21****<br>(0.01)           |                              |                              |                              |
| Positive mood                               |                              | -0.16****<br>(0.00)          |                              |                              |
| COVID-19 worry <sup>a</sup>                 |                              |                              |                              |                              |
| No worry                                    |                              |                              | -0.22****<br>(0.06)          |                              |
| Much of time                                |                              |                              | 1.06****<br>(0.06)           |                              |
| Most of time                                |                              |                              | 1.75****<br>(0.11)           |                              |
| Perceived risk of COVID-19                  |                              |                              |                              | 0.12****<br>(0.01)           |
| Constant                                    | 1.45****<br>(0.03)           | 5.20****<br>(0.07)           | 2.08****<br>(0.02)           | 1.62****<br>(0.06)           |

\*\*\*\*  $p < 0.0001$ , \*\*\*  $p < 0.001$ , \*\*  $p < 0.01$ , \*  $p < 0.05$

<sup>a</sup> Comparison reference group "I occasionally worry about getting COVID-19"

**Table S7: Univariable logistic regression coefficients for non-modifiable factors as predictors of anxiety cases <sup>a</sup>**

| GAD-7 “Cases”    | Odds Ratio<br>[95% CI]   |
|------------------|--------------------------|--------------------------|--------------------------|--------------------------|--------------------------|
| Age (per decade) | 0.70****<br>[0.66, 0.75] |                          |                          |                          |                          |
| Female           |                          | 1.56***<br>[1.22, 1.99]  |                          |                          |                          |
| Live alone       |                          |                          | 0.80<br>[0.62, 1.02]     |                          |                          |
| BAME background  |                          |                          |                          | 1.44**<br>[1.11, 1.86]   |                          |
| Key-worker       |                          |                          |                          |                          | 1.16<br>[0.99, 1.36]     |
| Constant         | 1.58***<br>[1.23, 2.04]  | 0.24****<br>[0.19, 0.30] | 0.36****<br>[0.33, 0.39] | 0.34****<br>[0.31, 0.37] | 0.33****<br>[0.29, 0.37] |

\*\*\*\*  $p < 0.0001$ , \*\*\*  $p < 0.001$ , \*\*  $p < 0.01$ , \*  $p < 0.05$

<sup>a</sup> a “case” is defined as a GAD-7 score greater than or equal to 10, at which level someone would qualify for high intensity psychological support in the NHS

**Table S8: Univariable logistic regression coefficients for modifiable factors as predictors of anxiety cases <sup>a</sup>**

| GAD-7 “Cases”               | Odds Ratio<br>[95% CI]   | Odds Ratio<br>[95% CI]       | Odds Ratio<br>[95% CI]      | Odds Ratio<br>[95% CI]   |
|-----------------------------|--------------------------|------------------------------|-----------------------------|--------------------------|
| Perceived loneliness        | 1.37****<br>[1.32, 1.41] |                              |                             |                          |
| Positive mood               |                          | 0.74****<br>[0.72, 0.76]     |                             |                          |
| COVID-19 worry <sup>b</sup> |                          |                              |                             |                          |
| No worry                    |                          |                              | 0.93<br>[0.72, 1.19]        |                          |
| Much of time                |                          |                              | 5.03****<br>[4.02, 6.28]    |                          |
| Most of time                |                          |                              | 24.75****<br>[14.83, 41.31] |                          |
| Perceived risk of COVID-19  |                          |                              |                             | 1.18****<br>[1.14, 1.23] |
| Constant                    | 0.09****<br>[0.08, 0.11] | 70.16****<br>[45.39, 108.44] | 0.23****<br>[0.21, 0.26]    | 0.14****<br>[0.11, 0.18] |

\*\*\*\*  $p < 0.0001$ , \*\*\*  $p < 0.001$ , \*\*  $p < 0.01$ , \*  $p < 0.05$

<sup>a</sup> a “case” is defined as a GAD-7 score greater than or equal to 10, at which level someone would qualify for high intensity psychological support in the NHS

<sup>b</sup> Comparison reference group “I occasionally worry about getting COVID-19”

### 1.3 Stress (PSS-4)

**Table S9: Univariable regression coefficients for non-modifiable factors as predictors of stress scores**

| PSS-4 Total Score | Coefficient<br>(Standard Error) |
|-------------------|---------------------------------|---------------------------------|---------------------------------|---------------------------------|---------------------------------|
| Age (per decade)  | -0.52****<br>(0.04)             |                                 |                                 |                                 |                                 |
| Female            |                                 | 0.71****<br>(0.16)              |                                 |                                 |                                 |
| Live alone        |                                 |                                 | 0.13<br>(0.17)                  |                                 |                                 |
| BAME background   |                                 |                                 |                                 | 0.84****<br>(0.20)              |                                 |
| Key-worker        |                                 |                                 |                                 |                                 | -0.11<br>(0.12)                 |
| Constant          | 8.84****<br>(0.18)              | 5.88****<br>(0.15)              | 6.46****<br>(0.06)              | 6.40****<br>(0.06)              | 6.53****<br>(0.08)              |

\*\*\*\*  $p < 0.0001$ , \*\*\*  $p < 0.001$ , \*\*  $p < 0.01$ , \*  $p < 0.05$

**Table S10: Univariable regression coefficients for modifiable factors as predictors of stress scores**

| PSS-4 Total Score           | Coefficient<br>(Standard Error) | Coefficient<br>(Standard Error) | Coefficient<br>(Standard Error) | Coefficient<br>(Standard Error) |
|-----------------------------|---------------------------------|---------------------------------|---------------------------------|---------------------------------|
| Perceived loneliness        | 0.62****<br>(0.02)              |                                 |                                 |                                 |
| Positive mood               |                                 | -0.46****<br>(0.01)             |                                 |                                 |
| COVID-19 worry <sup>a</sup> |                                 |                                 |                                 |                                 |
| No worry                    |                                 |                                 | -0.14<br>(0.15)                 |                                 |
| Much of time                |                                 |                                 | 1.90****<br>(0.17)              |                                 |
| Most of time                |                                 |                                 | 3.78****<br>(0.29)              |                                 |
| Perceived risk of COVID-19  |                                 |                                 |                                 | 0.22****<br>(0.03)              |
| Constant                    | 4.09****<br>(0.09)              | 15.28****<br>(0.16)             | 6.10****<br>(0.07)              | 5.31****<br>(0.15)              |

\*\*\*\*  $p < 0.0001$ , \*\*\*  $p < 0.001$ , \*\*  $p < 0.01$ , \*  $p < 0.05$

<sup>a</sup> Comparison reference group "I occasionally worry about getting COVID-19"



## Appendix 2: Multivariable regression models, excluding perceived risk of COVID-19

**Table S11: Regression model showing associations between modifiable explanatory variables and depression scores (excluding perceived risk of COVID-19)**

|                                                                 | B     | 95% CI Lower | 95% CI Upper | $\beta$ | p          |
|-----------------------------------------------------------------|-------|--------------|--------------|---------|------------|
| <b>PHQ-9 Total Score<sup>a</sup></b>                            |       |              |              |         |            |
| Age (per decade)                                                | -0.17 | -0.19        | -0.15        | -0.21   | <.0001**** |
| Female                                                          | 0.19  | 0.11         | 0.27         | 0.06    | <.0001**** |
| Live alone                                                      | -0.00 | -0.09        | 0.09         | -0.00   | 0.99       |
| BAME background                                                 | -0.06 | -0.16        | 0.04         | -0.01   | 0.25       |
| Key-worker                                                      | 0.06  | -0.00        | 0.11         | 0.02    | 0.059      |
| Perceived loneliness                                            | 0.10  | 0.08         | 0.11         | 0.22    | <.0001**** |
| Positive mood                                                   | -0.12 | -0.13        | -0.11        | -0.49   | <.0001**** |
| COVID-19 worry <sup>b</sup>                                     |       |              |              |         |            |
| No worry                                                        | 0.02  | -0.06        | 0.10         | 0.01    | 0.61       |
| Much of time                                                    | 0.29  | 0.20         | 0.37         | 0.08    | <.0001**** |
| Most of time                                                    | 0.35  | 0.20         | 0.50         | 0.06    | <.0001**** |
| <b>Adj R<sup>2</sup>=.56, F(10,3079)=389.21, p&lt;.0001****</b> |       |              |              |         |            |

\*\*\*\* p<0.0001, \*\*\* p<0.001, \*\* p<0.01, \* p<0.05

<sup>a</sup> A square-root transformation was applied to the dependent variable

<sup>b</sup> Comparison reference group "I occasionally worry about getting COVID-19"

**Table S12: Logistic regression model showing associations between modifiable explanatory variables and depression cases (excluding perceived risk of COVID-19)**

|                                          | Odds Ratio | 95% CI Lower | 95% CI Upper | $\beta$ | p           |
|------------------------------------------|------------|--------------|--------------|---------|-------------|
| <b>PHQ-9 "Cases"<sup>a</sup></b>         |            |              |              |         |             |
| Age (per decade)                         | 0.69       | 0.64         | 0.74         | -1.19   | <.0001****  |
| Female                                   | 1.19       | 0.89         | 1.59         | 0.13    | 0.24        |
| Live alone                               | 0.84       | 0.62         | 1.16         | -0.12   | 0.29        |
| BAME background                          | 0.97       | 0.70         | 1.36         | -0.02   | 0.88        |
| Key-worker                               | 1.20       | 0.99         | 1.46         | 0.20    | 0.069       |
| Perceived loneliness                     | 1.21       | 1.16         | 1.26         | 1.13    | <.0001****  |
| Positive mood                            | 0.76       | 0.74         | 0.78         | -2.96   | <.0001****  |
| COVID-19 worry <sup>b</sup>              |            |              |              |         |             |
| No worry                                 | 0.91       | 0.69         | 1.22         | -0.07   | 0.54        |
| Much of time                             | 1.64       | 1.26         | 2.13         | 0.36    | 0.00025**** |
| Most of time                             | 2.66       | 1.60         | 4.45         | 0.41    | 0.00018**** |
| <b>Pseudo R<sup>2</sup>=0.34, n=3090</b> |            |              |              |         |             |

\*\*\*\* p<0.0001, \*\*\* p<0.001, \*\* p<0.01, \* p<0.05

<sup>a</sup> a "case" is defined as a PHQ-9 score greater than or equal to 10, at which level someone would qualify for high intensity psychological support in the NHS

<sup>b</sup> Comparison reference group "I occasionally worry about getting COVID-19"

**Table S13: Regression model showing associations between modifiable explanatory variables and anxiety scores (excluding perceived risk of COVID-19)**

|                                      | B     | 95% CI Lower | 95% CI Upper | $\beta$ | p          |
|--------------------------------------|-------|--------------|--------------|---------|------------|
| <b>GAD-7 Total Score<sup>a</sup></b> |       |              |              |         |            |
| Age (per decade)                     | -0.16 | -0.18        | -0.14        | -0.19   | <.0001**** |
| Female                               | 0.24  | 0.16         | 0.33         | 0.07    | <.0001**** |
| Live alone                           | -0.27 | -0.36        | -0.17        | -0.07   | <.0001**** |
| BAME background                      | -0.08 | -0.18        | 0.02         | -0.02   | 0.13       |
| Key-worker                           | 0.04  | -0.02        | 0.10         | 0.02    | 0.22       |
| Perceived loneliness                 | 0.06  | 0.05         | 0.07         | 0.14    | <.0001**** |
| Positive mood                        | -0.12 | -0.12        | -0.11        | -0.48   | <.0001**** |
| COVID-19 worry <sup>b</sup>          |       |              |              |         |            |
| No worry                             | -0.19 | -0.28        | -0.11        | -0.06   | <.0001**** |
| Much of time                         | 0.57  | 0.48         | 0.67         | 0.16    | <.0001**** |
| Most of time                         | 0.88  | 0.71         | 1.04         | 0.14    | <.0001**** |
| <b>Adj R<sup>2</sup>=.53, n=3090</b> |       |              |              |         |            |

\*\*\*\*  $p < 0.0001$ , \*\*\*  $p < 0.001$ , \*\*  $p < 0.01$ , \*  $p < 0.05$

<sup>a</sup> A square-root transformation was applied to the dependent variable

<sup>b</sup> Comparison reference group "I occasionally worry about getting COVID-19"

**Table S14: Logistic regression model showing associations between modifiable explanatory variables and anxiety cases (excluding perceived risk of COVID-19)**

|                                          | Odds Ratio | 95% CI Lower | 95% CI Upper | $\beta$ | p          |
|------------------------------------------|------------|--------------|--------------|---------|------------|
| <b>GAD-7 "Cases"<sup>a</sup></b>         |            |              |              |         |            |
| Age (per decade)                         | 0.69       | 0.64         | 0.75         | -1.26   | <.0001**** |
| Female                                   | 1.23       | 0.91         | 1.68         | 0.17    | 0.18       |
| Live alone                               | 0.56       | 0.40         | 0.79         | -0.45   | 0.00093*** |
| BAME background                          | 0.91       | 0.64         | 1.29         | -0.06   | 0.60       |
| Key-worker                               | 1.11       | 0.90         | 1.36         | 0.12    | 0.33       |
| Perceived loneliness                     | 1.13       | 1.08         | 1.18         | 0.75    | <.0001**** |
| Positive mood                            | 0.78       | 0.75         | 0.80         | -2.90   | <.0001**** |
| COVID-19 worry <sup>b</sup>              |            |              |              |         |            |
| No worry                                 | 0.72       | 0.53         | 0.99         | -0.27   | 0.041*     |
| Much of time                             | 3.55       | 2.73         | 4.61         | 0.98    | <.0001**** |
| Most of time                             | 12.52      | 6.95         | 22.53        | 1.11    | <.0001**** |
| <b>Pseudo R<sup>2</sup>=0.34, n=3090</b> |            |              |              |         |            |

\*\*\*\*  $p < 0.0001$ , \*\*\*  $p < 0.001$ , \*\*  $p < 0.01$ , \*  $p < 0.05$

<sup>a</sup> a "case" is defined as a GAD-7 score greater than or equal to 10, at which level someone would qualify for high intensity psychological support in the NHS

<sup>b</sup> Comparison reference group "I occasionally worry about getting COVID-19"

**Table S15: Regression model showing associations between modifiable explanatory variables and stress scores (excluding perceived risk of COVID-19)**

|                                      | <b>B</b> | <b>95% CI Lower</b> | <b>95% CI Upper</b> | <b><math>\beta</math></b> | <b><i>p</i></b> |
|--------------------------------------|----------|---------------------|---------------------|---------------------------|-----------------|
| <b>PSS-4 Total Score</b>             |          |                     |                     |                           |                 |
| Age (per decade)                     | -0.24    | -0.30               | -0.19               | -0.11                     | < .0001****     |
| Female                               | 0.30     | 0.09                | 0.52                | 0.03                      | 0.0056**        |
| Live alone                           | -0.37    | -0.61               | -0.12               | -0.04                     | 0.0030**        |
| BAME background                      | 0.21     | -0.06               | 0.47                | 0.02                      | 0.13            |
| Key-worker                           | -0.25    | -0.41               | -0.10               | -0.04                     | 0.0015**        |
| Perceived loneliness                 | 0.21     | 0.17                | 0.24                | 0.17                      | < .0001****     |
| Positive mood                        | -0.38    | -0.40               | -0.36               | -0.59                     | < .0001****     |
| COVID-19 worry <sup>a</sup>          |          |                     |                     |                           |                 |
| No worry                             | 0.00     | -0.21               | 0.21                | 0.00                      | 0.99            |
| Much of time                         | 0.37     | 0.13                | 0.60                | 0.04                      | 0.0022**        |
| Most of time                         | 0.99     | 0.58                | 1.40                | 0.06                      | < .0001****     |
| <b>Adj R<sup>2</sup>=.56, n=3090</b> |          |                     |                     |                           |                 |

\*\*\*\*  $p < 0.0001$ , \*\*\*  $p < 0.001$ , \*\*  $p < 0.01$ , \*  $p < 0.05$

<sup>a</sup> Comparison reference group "I occasionally worry about getting COVID-19"

1  
2  
3 **Appendix 3: Summary of modifiable and non-modifiable explanatory factors considered in the analysis**  
4

5 **Table S16: Explanatory factors considered in the analysis**  
6

|                               |                          | Question/scale                                                                      | Response(s)                                                                                                                                                                                                                                                                                                                                                                                                                                                                                                                                                                                                                                                             |
|-------------------------------|--------------------------|-------------------------------------------------------------------------------------|-------------------------------------------------------------------------------------------------------------------------------------------------------------------------------------------------------------------------------------------------------------------------------------------------------------------------------------------------------------------------------------------------------------------------------------------------------------------------------------------------------------------------------------------------------------------------------------------------------------------------------------------------------------------------|
| <b>Non-modifiable factors</b> |                          |                                                                                     |                                                                                                                                                                                                                                                                                                                                                                                                                                                                                                                                                                                                                                                                         |
|                               | Gender*                  | What was your gender at birth?                                                      | Male<br>Female<br>Other<br>Prefer not to say                                                                                                                                                                                                                                                                                                                                                                                                                                                                                                                                                                                                                            |
|                               | Age                      | How old are you?                                                                    | ..                                                                                                                                                                                                                                                                                                                                                                                                                                                                                                                                                                                                                                                                      |
|                               | Ethnicity*               | What is your ethnicity                                                              | White – British, Irish, other<br>Asian/Asian British – Indian, Pakistani, Bangladeshi, other<br>Black/Black British – Caribbean, African, other<br>Chinese/Chinese British<br>Mixed race – White and Black/Black British<br>Middle Eastern/Middle Eastern British – Arab, Turkish, other<br>Mixed race – other<br>Other ethnic group<br>Prefer not to say                                                                                                                                                                                                                                                                                                               |
|                               | <i>Key-worker status</i> | Are you currently fulfilling any of the government's identified 'key worker' roles? | Health, social care or relevant related support worker<br>Teacher or childcare worker still travelling in to work<br>Transport worker still travelling in to work<br>Food chain worker (e.g. production, sale, delivery)<br>Key public services worker (e.g. justice staff, religious staff, public service journalist or mortuary worker)<br>Local or national government worker delivering essential public services<br>Utility worker (e.g. energy, sewerage, postal service)<br>Public safety or national security worker<br>Worker involved in medicines or protective equipment production or distribution<br>Other 'key worker' role not listed<br>None of these |

1  
2  
3  
4  
5  
6  
7  
8  
9  
10  
11  
12  
13  
14  
15  
16  
17  
18  
19  
20  
21  
22  
23  
24  
25  
26  
27  
28  
29  
30  
31  
32  
33  
34  
35  
36  
37  
38  
39  
40  
41  
42  
43  
44  
45  
46

Living alone/with others

Do you live with someone? Yes  
No

**Modifiable factors**

*Perceived loneliness*<sup>†</sup>

On a scale of 1-10, how lonely have you felt over the past 2 weeks?

1 (Not at all lonely) - 10 (Extremely lonely)

*Perceived risk of COVID-19*

On a scale of 1-10, what do you believe your risk of getting COVID-19 is?

1 (I don't think I will get it) - 10 (I know I will most certainly get it)

*Positive mood*<sup>‡</sup>

In the past 2 weeks, I have felt Positive.

1=Very rarely or never/ 2=Rarely/ 3=Sometimes/ 4=Often/ 5=Very often or always

In the past 2 weeks, I have felt Good.

1=Very rarely or never/ 2=Rarely/ 3=Sometimes/ 4=Often/ 5=Very often or always

In the past 2 weeks, I have felt Pleasant.

1=Very rarely or never/ 2=Rarely/ 3=Sometimes/ 4=Often/ 5=Very often or always

In the past 2 weeks, I have felt Happy.

1=Very rarely or never/ 2=Rarely/ 3=Sometimes/ 4=Often/ 5=Very often or always

In the past 2 weeks, I have felt Joyful.

1=Very rarely or never/ 2=Rarely/ 3=Sometimes/ 4=Often/ 5=Very often or always

*Worry about contracting COVID-19*

Please read the following statements carefully and then select the one which best describe how you have felt over the past 2 weeks.

I do not worry about getting COVID-19.

I occasionally worry about getting COVID-19.

I spend much of my time worrying about getting COVID-19.

I spend most of my time worrying about getting COVID-19.

---

\*Gender and ethnicity were treated as binary variables in all analyses: gender (male, female), ethnicity (white British, non-white British).

† The factors in *Italic* were hypothesised to be associated with an increased risk of adverse mental health outcomes, apart from key-worker status where evidence exists that some key-worker roles are also associated with an increased risk of adverse COVID-19 outcomes. All other factors were hypothesised to be associated with an increased risk of contracting COVID-19 and/or poorer disease outcomes.

‡Positive mood was measured using the positive items from SPANE: Scale of Positive and Negative Experience ( $\alpha=0.94$ ).<sup>22</sup>

Appendix 4: Boxplots of outcome variable scores by gender and age groups

Figure S1: Boxplot of depression (PHQ-9) scores

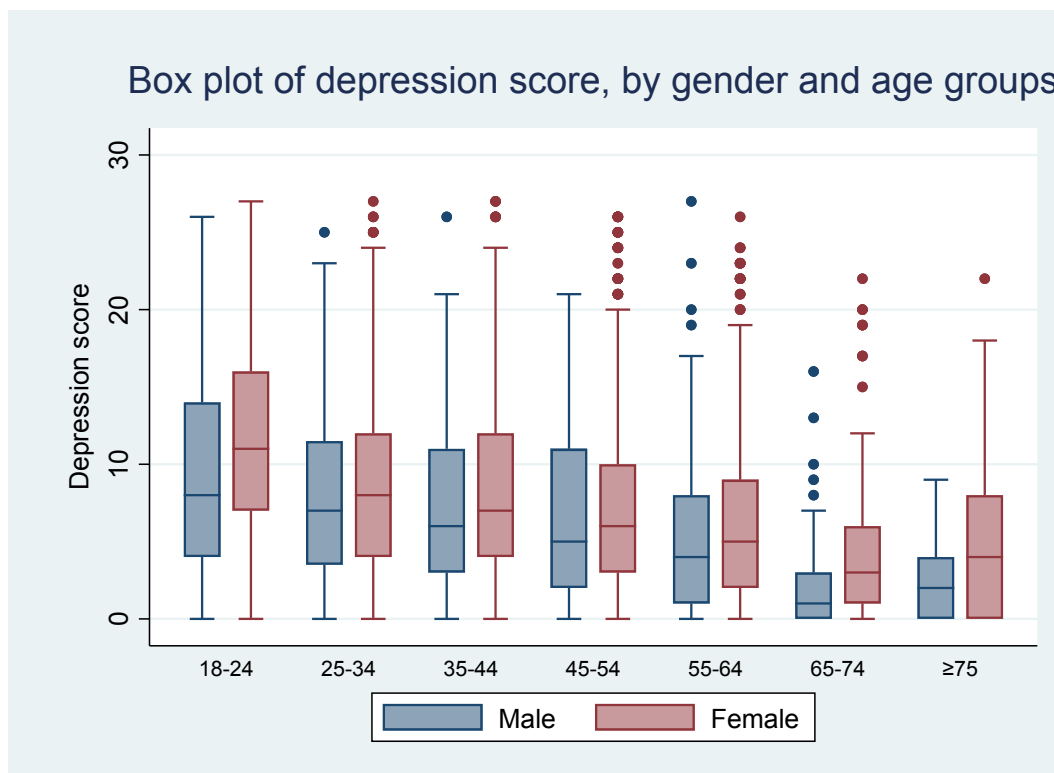

Figure S2: Boxplot of anxiety (GAD-7) scores

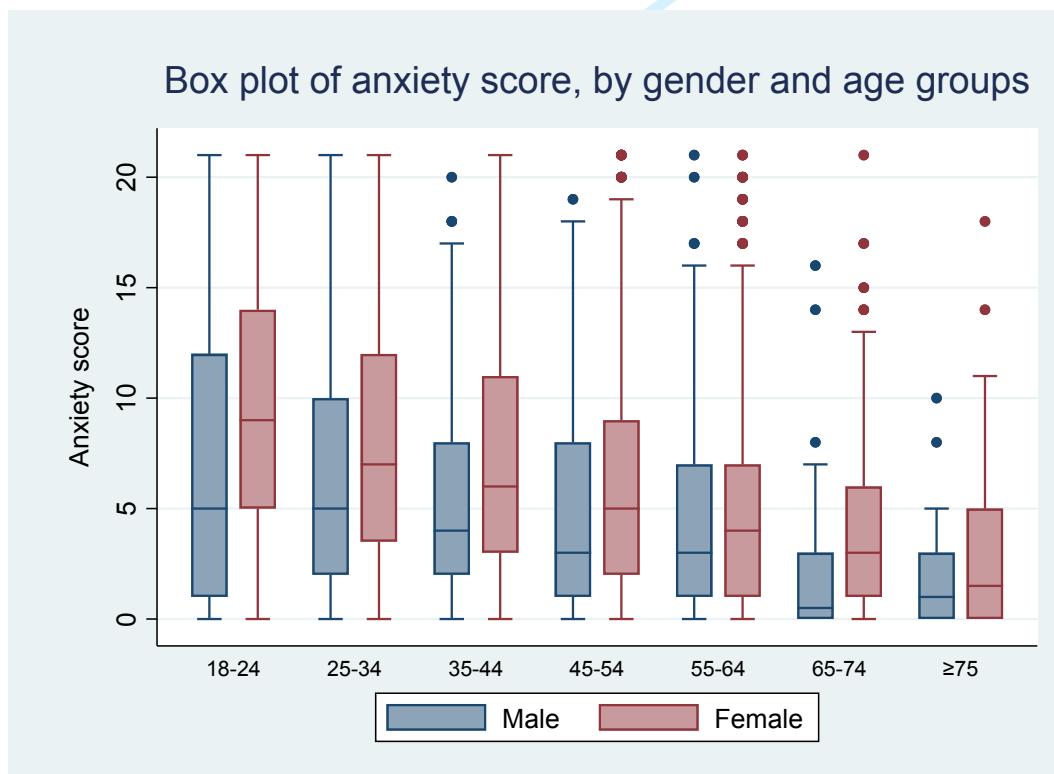

Figure S3: Boxplot of stress (PSS-4) scores

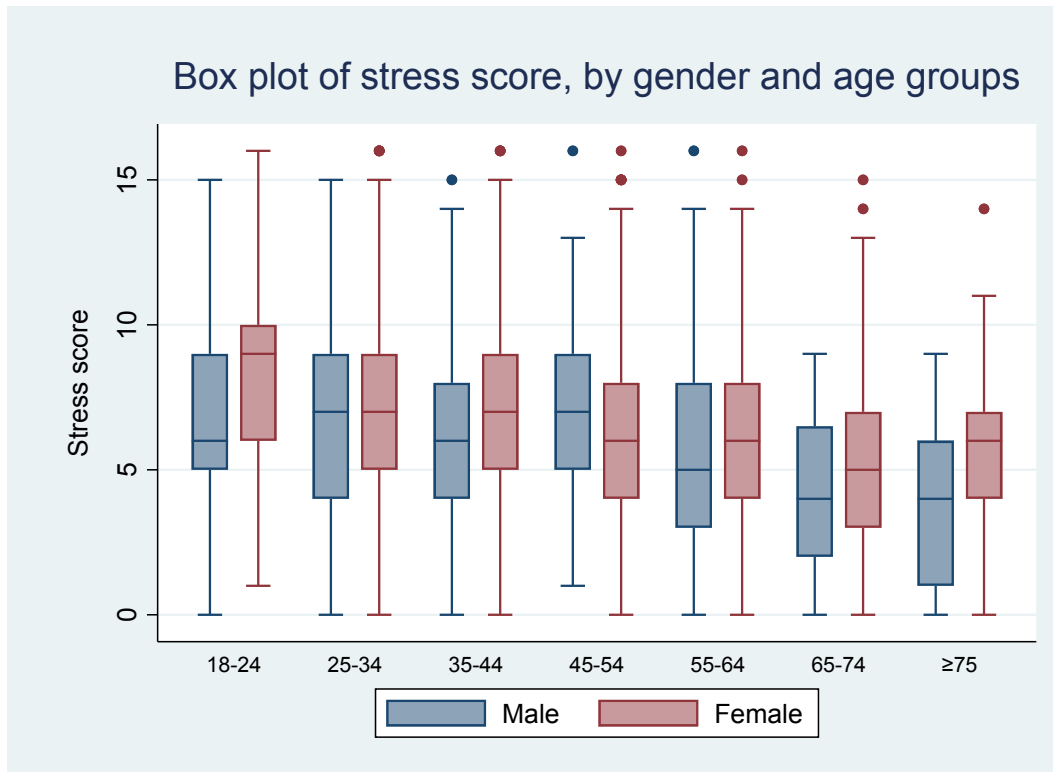

Review only

## STROBE (Strengthening The Reporting of OBServational Studies in Epidemiology) Checklist

A checklist of items that should be included in reports of observational studies. You must report the page number in your manuscript where you consider each of the items listed in this checklist. If you have not included this information, either revise your manuscript accordingly before submitting or note N/A.

**Note:** An Explanation and Elaboration article discusses each checklist item and gives methodological background and published examples of transparent reporting. The STROBE checklist is best used in conjunction with this article (freely available on the Web sites of PLoS Medicine at <http://www.plosmedicine.org/>, Annals of Internal Medicine at <http://www.annals.org/>, and Epidemiology at <http://www.epidem.com/>). Information on the STROBE Initiative is available at [www.strobe-statement.org](http://www.strobe-statement.org).

| Section and Item     | Item No. | Recommendation                                                                                                                                                                                                                                                                                                                                                                                                                                                                 | Reported on Page No. |
|----------------------|----------|--------------------------------------------------------------------------------------------------------------------------------------------------------------------------------------------------------------------------------------------------------------------------------------------------------------------------------------------------------------------------------------------------------------------------------------------------------------------------------|----------------------|
| Title and Abstract   | 1        | (a) Indicate the study's design with a commonly used term in the title or the abstract                                                                                                                                                                                                                                                                                                                                                                                         |                      |
|                      |          | (b) Provide in the abstract an informative and balanced summary of what was done and what was found                                                                                                                                                                                                                                                                                                                                                                            |                      |
| <b>Introduction</b>  |          |                                                                                                                                                                                                                                                                                                                                                                                                                                                                                |                      |
| Background/Rationale | 2        | Explain the scientific background and rationale for the investigation being reported                                                                                                                                                                                                                                                                                                                                                                                           |                      |
| Objectives           | 3        | State specific objectives, including any prespecified hypotheses                                                                                                                                                                                                                                                                                                                                                                                                               |                      |
| <b>Methods</b>       |          |                                                                                                                                                                                                                                                                                                                                                                                                                                                                                |                      |
| Study Design         | 4        | Present key elements of study design early in the paper                                                                                                                                                                                                                                                                                                                                                                                                                        |                      |
| Setting              | 5        | Describe the setting, locations, and relevant dates, including periods of recruitment, exposure, follow-up, and data collection                                                                                                                                                                                                                                                                                                                                                |                      |
| Participants         | 6        | (a) <i>Cohort study</i> —Give the eligibility criteria, and the sources and methods of selection of participants. Describe methods of follow-up<br><br><i>Case-control study</i> —Give the eligibility criteria, and the sources and methods of case ascertainment and control selection. Give the rationale for the choice of cases and controls<br><br><i>Cross-sectional study</i> —Give the eligibility criteria, and the sources and methods of selection of participants |                      |
|                      |          | (b) <i>Cohort study</i> —For matched studies, give matching criteria and number of exposed and unexposed<br><br><i>Case-control study</i> —For matched studies, give matching criteria and the number of controls per case                                                                                                                                                                                                                                                     |                      |
| Variables            | 7        | Clearly define all outcomes, exposures, predictors, potential confounders, and effect modifiers. Give diagnostic criteria, if applicable                                                                                                                                                                                                                                                                                                                                       |                      |



| Section and Item             | Item No. | Recommendation                                                                                                                                                                                                                                                                                                    | Reported on Page No. |
|------------------------------|----------|-------------------------------------------------------------------------------------------------------------------------------------------------------------------------------------------------------------------------------------------------------------------------------------------------------------------|----------------------|
| Data Sources/<br>Measurement | 8*       | For each variable of interest, give sources of data and details of methods of assessment (measurement). Describe comparability of assessment methods if there is more than one group                                                                                                                              |                      |
| Bias                         | 9        | Describe any efforts to address potential sources of bias                                                                                                                                                                                                                                                         |                      |
| Study Size                   | 10       | Explain how the study size was arrived at                                                                                                                                                                                                                                                                         |                      |
| Quantitative Variables       | 11       | Explain how quantitative variables were handled in the analyses. If applicable, describe which groupings were chosen and why                                                                                                                                                                                      |                      |
| Statistical Methods          | 12       | (a) Describe all statistical methods, including those used to control for confounding                                                                                                                                                                                                                             |                      |
|                              |          | (b) Describe any methods used to examine subgroups and interactions                                                                                                                                                                                                                                               |                      |
|                              |          | (c) Explain how missing data were addressed                                                                                                                                                                                                                                                                       |                      |
|                              |          | (d) <i>Cohort study</i> —If applicable, explain how loss to follow-up was addressed<br><br><i>Case-control study</i> —If applicable, explain how matching of cases and controls was addressed<br><br><i>Cross-sectional study</i> —If applicable, describe analytical methods taking account of sampling strategy |                      |
|                              |          | (e) Describe any sensitivity analyses                                                                                                                                                                                                                                                                             |                      |
| <b>Results</b>               |          |                                                                                                                                                                                                                                                                                                                   |                      |
| Participants                 | 13*      | (a) Report numbers of individuals at each stage of study—eg numbers potentially eligible, examined for eligibility, confirmed eligible, included in the study, completing follow-up, and analysed                                                                                                                 |                      |
|                              |          | (b) Give reasons for non-participation at each stage                                                                                                                                                                                                                                                              |                      |
|                              |          | (c) Consider use of a flow diagram                                                                                                                                                                                                                                                                                |                      |
| Descriptive Data             | 14*      | (a) Give characteristics of study participants (eg demographic, clinical, social) and information on exposures and potential confounders                                                                                                                                                                          |                      |
|                              |          | (b) Indicate number of participants with missing data for each variable of interest                                                                                                                                                                                                                               |                      |
|                              |          | (c) <i>Cohort study</i> —Summarise follow-up time (eg, average and total amount)                                                                                                                                                                                                                                  |                      |
| Outcome Data                 | 15*      | <i>Cohort study</i> —Report numbers of outcome events or summary measures over time                                                                                                                                                                                                                               |                      |
|                              |          | <i>Case-control study</i> —Report numbers in each exposure category, or summary measures of exposure                                                                                                                                                                                                              |                      |
|                              |          | <i>Cross-sectional study</i> —Report numbers of outcome events or summary measures                                                                                                                                                                                                                                |                      |

| Section and Item         | Item No. | Recommendation                                                                                                                                                                                               | Reported on Page No. |
|--------------------------|----------|--------------------------------------------------------------------------------------------------------------------------------------------------------------------------------------------------------------|----------------------|
| Main Results             | 16       | (a) Give unadjusted estimates and, if applicable, confounder-adjusted estimates and their precision (eg, 95% confidence interval). Make clear which confounders were adjusted for and why they were included |                      |
|                          |          | (b) Report category boundaries when continuous variables were categorized                                                                                                                                    |                      |
|                          |          | (c) If relevant, consider translating estimates of relative risk into absolute risk for a meaningful time period                                                                                             |                      |
| Other Analyses           | 17       | Report other analyses done—eg analyses of subgroups and interactions, and sensitivity analyses                                                                                                               |                      |
| <b>Discussion</b>        |          |                                                                                                                                                                                                              |                      |
| Key Results              | 18       | Summarise key results with reference to study objectives                                                                                                                                                     |                      |
| Limitations              | 19       | Discuss limitations of the study, taking into account sources of potential bias or imprecision. Discuss both direction and magnitude of any potential bias                                                   |                      |
| Interpretation           | 20       | Give a cautious overall interpretation of results considering objectives, limitations, multiplicity of analyses, results from similar studies, and other relevant evidence                                   |                      |
| Generalisability         | 21       | Discuss the generalisability (external validity) of the study results                                                                                                                                        |                      |
| <b>Other Information</b> |          |                                                                                                                                                                                                              |                      |
| Funding                  | 22       | Give the source of funding and the role of the funders for the present study and, if applicable, for the original study on which the present article is based                                                |                      |

\*Give information separately for cases and controls in case-control studies and, if applicable, for exposed and unexposed groups in cohort and cross-sectional studies.

**Once you have completed this checklist, please save a copy and upload it as part of your submission. DO NOT include this checklist as part of the main manuscript document. It must be uploaded as a separate file.**

# BMJ Open

## Mental health in the UK during the COVID-19 pandemic: Cross-sectional analyses from a community cohort study

|                                 |                                                                                                                                                                                                                                                                                                                                                                                                                                                                                                          |
|---------------------------------|----------------------------------------------------------------------------------------------------------------------------------------------------------------------------------------------------------------------------------------------------------------------------------------------------------------------------------------------------------------------------------------------------------------------------------------------------------------------------------------------------------|
| Journal:                        | <i>BMJ Open</i>                                                                                                                                                                                                                                                                                                                                                                                                                                                                                          |
| Manuscript ID                   | bmjopen-2020-040620.R1                                                                                                                                                                                                                                                                                                                                                                                                                                                                                   |
| Article Type:                   | Original research                                                                                                                                                                                                                                                                                                                                                                                                                                                                                        |
| Date Submitted by the Author:   | 28-Jul-2020                                                                                                                                                                                                                                                                                                                                                                                                                                                                                              |
| Complete List of Authors:       | Jia, Ru; University of Nottingham Division of Primary Care<br>Ayling, Kieran; University of Nottingham Division of Primary Care<br>Chalder, Trudie; King's College London, PSYCHOLOGICAL MEDICINE<br>Massey, Adam; University of Nottingham Division of Primary Care<br>Broadbent, E; The University of Auckland Faculty of Medical and Health<br>Sciences<br>Coupland, Carol; University of Nottingham, Division of Primary Care<br>Vedhara, Kavita; University of Nottingham, Division of Primary Care |
| <b>Primary Subject Heading</b>: | Mental health                                                                                                                                                                                                                                                                                                                                                                                                                                                                                            |
| Secondary Subject Heading:      | Epidemiology, Health services research, Public health                                                                                                                                                                                                                                                                                                                                                                                                                                                    |
| Keywords:                       | MENTAL HEALTH, PSYCHIATRY, PUBLIC HEALTH                                                                                                                                                                                                                                                                                                                                                                                                                                                                 |
|                                 |                                                                                                                                                                                                                                                                                                                                                                                                                                                                                                          |

SCHOLARONE™  
Manuscripts



I, the Submitting Author has the right to grant and does grant on behalf of all authors of the Work (as defined in the below author licence), an exclusive licence and/or a non-exclusive licence for contributions from authors who are: i) UK Crown employees; ii) where BMJ has agreed a CC-BY licence shall apply, and/or iii) in accordance with the terms applicable for US Federal Government officers or employees acting as part of their official duties; on a worldwide, perpetual, irrevocable, royalty-free basis to BMJ Publishing Group Ltd ("BMJ") its licensees and where the relevant Journal is co-owned by BMJ to the co-owners of the Journal, to publish the Work in this journal and any other BMJ products and to exploit all rights, as set out in our [licence](#).

The Submitting Author accepts and understands that any supply made under these terms is made by BMJ to the Submitting Author unless you are acting as an employee on behalf of your employer or a postgraduate student of an affiliated institution which is paying any applicable article publishing charge ("APC") for Open Access articles. Where the Submitting Author wishes to make the Work available on an Open Access basis (and intends to pay the relevant APC), the terms of reuse of such Open Access shall be governed by a Creative Commons licence – details of these licences and which [Creative Commons](#) licence will apply to this Work are set out in our licence referred to above.

Other than as permitted in any relevant BMJ Author's Self Archiving Policies, I confirm this Work has not been accepted for publication elsewhere, is not being considered for publication elsewhere and does not duplicate material already published. I confirm all authors consent to publication of this Work and authorise the granting of this licence.

1  
2  
3 **Mental health in the UK during the COVID-19 pandemic: Cross-sectional analyses from a community**  
4 **cohort study**  
5  
6  
7

8 **Brief title: Mental Health in the UK & COVID-19: A cohort study**  
9

10  
11 <sup>1</sup>Ru Jia MSc [Research Assistant],

12 <sup>1</sup>Kieran Ayling PhD [Senior Research Fellow],

13 <sup>2</sup>Trudie Chalder PhD [Professor of Cognitive Behavioural Psychotherapy],

14 <sup>1</sup>Adam Massey PhD [Honorary Research Associate],

15 <sup>3</sup>Elizabeth Broadbent PhD [Professor in Health Psychology],

16 <sup>1</sup>Carol Coupland PhD [Professor of Medical Statistics in Primary Care],

17 <sup>1\*</sup>Kavita Vedhara PhD [Professor of Health Psychology]

18  
19  
20  
21  
22  
23  
24  
25 <sup>1</sup>Division of Primary Care

26 University of Nottingham

27 University Park

28 Nottingham, NG7 2RD

29  
30  
31  
32  
33 <sup>2</sup>Department of Psychological Medicine,

34 Institute of Psychiatry, Psychology & Neuroscience,

35 King's College London,

36 16, De Crespigny Park,

37 London, SE5 8AF,

38 United Kingdom.  
39  
40  
41  
42  
43  
44

45 <sup>3</sup>Department of Psychological Medicine,

46 University of Auckland,

47 Private bag 92019, Auckland,

48 New Zealand.  
49  
50  
51  
52  
53  
54

55 \* Author to whom all correspondence should be addressed: Professor Kavita Vedhara, Division of Primary  
56 Care, University of Nottingham, University Park, Nottingham, NG7 2RD, UK.

57 [Kavita.vedhara@nottingham.ac.uk](mailto:Kavita.vedhara@nottingham.ac.uk); Tel +44 115 8466931  
58  
59  
60

## Abstract

**Objectives:** Previous pandemics have resulted in significant consequences for mental health. Here we report the mental health sequelae of the COVID-19 pandemic in a UK cohort and examine modifiable and non-modifiable explanatory factors associated with mental health outcomes. We focus on the short-term consequences for mental health, as reported during the first four-six weeks of social distancing measures being introduced.

**Design:** Cross sectional online survey

**Setting:** Community cohort study

**Participants:** N=3097 adults aged  $\geq 18$  years were recruited through a mainstream and social media campaign between 3/4/20-30/4/20. The cohort was predominantly female (n=2618); mean age forty-four years; 10% (n=296) from minority ethnic groups; 50% (n=1559) described themselves as key-workers and 20% (n=649) identified as having clinical risk factors putting them at increased risk of COVID-19

**Main outcome measures:** depression, anxiety and stress scores.

**Results:** Mean scores for depression ( $\bar{x}=7.69$ ,  $sd=6.0$ ), stress ( $\bar{x}=6.48$ ,  $sd=3.3$ ), and anxiety ( $\bar{x}=6.48$ ,  $sd=3.3$ ) significantly exceeded population norms (all  $p<0.0001$ ). Analysis of non-modifiable factors hypothesised to be associated with mental health outcomes indicated that being younger, female and in a recognised COVID-19 risk group were associated with increased stress, anxiety and depression, with the final multivariable models accounting for 7-14% of variance. When adding modifiable factors, significant independent effects emerged for positive mood, perceived loneliness and worry about getting COVID-19 for all outcomes, with the final multivariable models accounting for 54-57% of total variance.

**Conclusions:** Increased psychological morbidity was evident in this UK sample and found to be more common in younger people, women and in individuals who identified as being in recognised COVID-19 risk groups. Public health and mental health interventions able to ameliorate perceptions of risk of COVID-19, worry about COVID-19 loneliness, and boost positive mood may be effective.

### Article Summary

- To our knowledge, this paper provides the first empirical evidence from a large cohort on the mental health impact of the COVID-19 pandemic on people in the UK
- The findings are based on a large community cohort of N=3097 adults aged 18 years or older, capturing the views of people across the UK, including key-workers and individuals from ethnic minority groups.
- The use of validated measures of mental health allows us to conclude that levels of depression, anxiety and stress significantly exceed previously reported population norms.
- The assessment of demographic and modifiable psychological variables allows us to report on which groups appear to be at greatest risk of increased psychological morbidity, as well as potential psychological targets for future interventions.
- The cross-sectional design prohibits an analysis of causal relationships and the recruitment of a self-selected community sample has implications for generalisability.

## Introduction

The COVID-19 (Coronavirus, 2019) pandemic has resulted in unprecedented disruption to the fabric of society, our health service and economy. However, the multitude of challenges presented by the pandemic may also pose a significant threat to our psychological health. <sup>1</sup> Individuals are facing a panoply of stressors including serious illness, bereavement, social distancing, and unemployment. The consequences of these stressors for mental health will not be uniform, rather they will be influenced by a range of modifiable and non-modifiable factors. Identification of the latter will be critical in determining who may be at greatest risk of mental health difficulties and should be the focus of future interventions; while the former can inform approaches to intervention. We report here cross-sectional findings from a community cohort study designed to capture both the mental health sequelae of the COVID-19 pandemic, as well as the modifiable and non-modifiable explanatory factors associated with adverse mental health outcomes. Our focus is on the immediate consequences for mental health, as reported during the first 4-6 weeks of social distancing measures being introduced in the UK.

In keeping with its recent emergence, much remains unknown about COVID-19 and its consequences. However, the expectation is that the consequences for both mental and physical health will be profound and far reaching. <sup>2</sup> With regard to the former, evidence from China attests to this possibility. <sup>3,4</sup>, as does the experience of previous pandemics. <sup>5,6</sup> Indeed, preliminary evidence from the UK suggests that these experiences may be replicated here.<sup>7</sup> } But who might be at greatest risk of mental health difficulties? Individuals at increased risk of the disease and/or adverse outcomes might be expected to experience greater psychological morbidity. For example, the death rate is known to be higher in men and older individuals.<sup>8,9</sup> The latter being also more likely to have co-existing conditions and be socially-isolated through shielding. The ethnic diversity of countries such as the US and UK has also highlighted that individuals from Black, Asian and Minority Ethnic (BAME) backgrounds appear to be affected disproportionately by the disease.<sup>10</sup> Recent UK data also suggest that key-workers, in particular those in social care, are at greater risk of COVID-19 related mortality. <sup>8</sup>

The aforementioned factors are, however, largely non-modifiable and thus are valuable in understanding who may be at greatest risk of mental health difficulties and in need of intervention. Do modifiable risk factors exist which could be targets for intervention? Stress and coping theory.<sup>11</sup> attests that emotional responses to challenging situations vary according to both our appraisal of stressors and the availability of psychological and social resources. Cognitions are central to the former and evidence from previous pandemics and the COVID-19 pandemic suggest that perceptions of the risk of contracting the disease and increased worry about risks to health are positively associated with adverse mental health outcomes.<sup>12-14</sup> In terms of resources, social support,



1  
2  
3 and its corollary loneliness, are among the best established determinants of our emotional responses to stressors.  
4  
5 Successive systematic reviews demonstrate poorer mental health outcomes and increased morbidity and  
6  
7 mortality in individuals who perceive themselves to be more lonely and lacking in support.<sup>15,16</sup> Positive mood,  
8  
9 now no longer viewed as just the opposite of negative mood, may also confer direct effects on well-being as  
10  
11 well as protective effects in challenging situations.<sup>11,17-19</sup> In terms of mental health, evidence suggests that the  
12  
13 existence of positive mood reduces the risk of mood disorders by 28% and anxiety disorders by 53%, and also  
14  
15 influences recovery from some mental health conditions.<sup>20,21</sup>

16  
17 Taken together there is an urgent need to report evidence on the prevalence of mental health problems during  
18  
19 the COVID-19 pandemic, to understand who may be at greatest risk, and to explore the psychological and social  
20  
21 resources that may mitigate this risk. To that end, we report cross sectional findings from a community cohort  
22  
23 survey conducted between 3<sup>rd</sup> and 30<sup>th</sup> April 2020 which coincided with the first 4-6 weeks of social distancing  
24  
25 measures being introduced in the UK.

## 26 27 28 **Methods**

### 29 30 **Ethics, Recruitment and Eligibility**

31  
32 Ethical approval was granted from the University of Nottingham Faculty of Medicine and Health Sciences (ref:  
33  
34 506-2003) and the NHS Health Research Authority (ref: 20/HRA/1858). The study was launched on 3/4/20 with  
35  
36 participants recruited in the community through a social and mainstream media campaign involving, but not  
37  
38 limited to, Facebook and Twitter. In addition, HRA regulatory approval enabled us to approach NHS  
39  
40 organisations and request they advertise the research through their routine communications. Recruitment  
41  
42 continued until 30/4/20. All media directed potential participants to the study website  
43  
44 ([www.covidstresstudy.co.uk](http://www.covidstresstudy.co.uk)) through which they accessed the information sheet, consent form and online  
45  
46 survey.

47  
48 Eligibility criteria specified that participants should be: aged 18 and over; able to give informed consent; able to  
49  
50 read English; residing in the UK at the time of completing the survey and able to provide a sample of hair at  
51  
52 least 1 cm long. The latter was collected for the determination of the stress biomarker cortisol which will be the  
53  
54 subject of future manuscripts.

### 55 56 **Patient and public involvement (PPI)**

57  
58 We convened a virtual PPI group to support this research the aims of which were to advise on the development  
59  
60 of the survey, the participant information sheet and optimising recruitment and retention. Individuals

1  
2  
3 participated via MS Teams in one-to-one or group discussions. These discussions informed the length and  
4 structure of the survey, language of the information sheet and strategies for recruiting via media and social  
5 media. The views of this group were instrumental in achieving our large sample size. This group also advised on  
6 providing regular feedback to participants on study findings through the study website and between each wave  
7 of data collection.  
8  
9  
10  
11

### 12 **Sample size**

13 We did not place an upper limit on participant numbers to enable us to obtain precise estimates of population  
14 values and associations, and to be able to examine these in subgroups. As a minimum we estimated that 252  
15 participants would be required to detect an  $R^2$  value of 0.1, with 90% power and a 5% significance level based  
16 on inclusion of 20 explanatory variables in a multiple linear regression model.  
17  
18  
19  
20  
21  
22

### 23 **Procedures**

24 Consenting participants completed an online survey implemented through JISC Online Survey  
25 (<https://www.onlinesurveys.ac.uk/>). This included validated measures capturing the mental health outcomes:  
26 anxiety ( $\alpha=0.88$ ), depression ( $\alpha=0.92$ ) and stress ( $\alpha=0.76$ ).<sup>22-25</sup> Depression was measured using the 9-item  
27 Patient Health Questionnaire (PHQ-9) where participants were asked how often, over the past 2 weeks, they  
28 were bothered by each problem and selected their answers from a 4-point scale ranging from “not at all” (0) to  
29 “nearly every day” (3). PHQ-9 scores range from 0 to 27 with higher scores indicating worse levels of  
30 depression severity. Anxiety was measured using the 7-item Generalized Anxiety Disorder Scale (GAD-7)  
31 where participants were asked how often, during the last 2 weeks, they have been bothered by each problem and  
32 selected their responses from a 4-point list: “not at all” – “nearly every day” (0-3). GAD-7 scores range from 0  
33 to 21 with higher scores indicating worse anxiety levels. Stress was measured using the 4-item Perceived Stress  
34 Scale (PSS-4) where participants were asked to rate how often they have experienced stress over the last two  
35 weeks on a 5-point scale ranging from “Never” (0) to “Very often” (4). Total scores of PSS-4 range from 0 to  
36 16 with higher scores indicating higher levels of stress.  
37  
38  
39  
40  
41  
42  
43  
44  
45  
46  
47  
48  
49  
50

51 We also measured modifiable and non-modifiable variables we hypothesised would be related to these mental  
52 health outcomes due to being (i) associated with an increased risk of contracting COVID-19 and/or adverse  
53 disease outcomes; or (ii) known to be directly associated with adverse mental health outcomes. These were: age,  
54 gender, ethnicity, key-worker status, living alone, positive mood, worry about contracting COVID-19 and  
55 perceived loneliness and risk of COVID-19 (see supplementary appendix 1). Positive mood was measured using  
56  
57  
58  
59  
60

1  
2  
3 six items from the Scale of Positive and Negative Experience (SPANE).<sup>25</sup> Total scores of positive mood range  
4 from 6 to 30 with higher scores indicating greater positive mood. COVID-19 risk status, perceived risk of  
5 contracting COVID-19, COVID-19 worry, perceived loneliness, and living alone were all measured using single  
6 items which are described in supplementary appendix 1.  
7  
8  
9

### 10 11 12 13 14 **Statistical analysis**

15  
16 We first summarised the outcome variables (depression, anxiety and stress scores) and participant characteristics  
17 with appropriate summary statistics and examined histograms and scatterplots. Comparisons with pre-pandemic  
18 normative values were made using independent samples t-tests. Examination of histograms indicated both  
19 depression and anxiety scores deviated from a normal distribution, however transformations or non-parametric  
20 tests were not suitable for these comparisons as only summary statistics not individual level data were available  
21 for normative data. While t-tests are robust to deviations from normality especially when sample sizes are  
22 large<sup>26</sup>, results of these specific tests should be interpreted with appropriate caution. To explore the associations  
23 between the outcome variables and non-modifiable and modifiable explanatory factors we first conducted  
24 univariable linear regression analyses (see supplementary appendix 2). Multivariable linear regression analyses  
25 were then used to explore the independent relationships of non-modifiable factors (age, gender, ethnicity,  
26 keyworker status, living alone, being in a recognised COVID-19 risk group) on outcome variables. Then, in  
27 subsequent models, modifiable explanatory factors (perceived loneliness, perceived risk of COVID-19, positive  
28 mood, worry about contracting COVID-19) were added to examine the additional and independent contribution  
29 of these factors to explaining variation in the outcome variables. The variable assessing COVID-19 worry was  
30 treated as a categorical variable in all models, with “occasional worry” treated as the reference value as this was  
31 the most common response. Assumptions of linear regression (normality and homoscedasticity of residuals,  
32 linearity with continuous variables) and presence of outliers were assessed graphically. Multicollinearity was  
33 checked for all models using variance inflation factors (VIF) and found to have acceptable levels. Square root  
34 transformations were used for depression and anxiety scores to satisfy assumptions. Robustness of the models  
35 was examined by removing data points with large residuals ( $<-3$  or  $>3$ ) and comparing results to the original  
36 models. In the vast majority of models, this had no substantive effect on interpretation. Thus these results are  
37 only mentioned where interpretation may be affected. Additionally, as perceived risk of getting COVID-19 was  
38 not assessed in those who thought they had had it (n=519) these participants are not represented in final  
39  
40  
41  
42  
43  
44  
45  
46  
47  
48  
49  
50  
51  
52  
53  
54  
55  
56  
57  
58  
59  
60

1  
2  
3 multivariable models. As a sensitivity analysis, models were additionally re-specified excluding this explanatory  
4 variable (see supplementary appendix 3).

5  
6  
7 For depression and anxiety we also carried out additional analyses dichotomising according to established cut-  
8 offs (scores of 10 or greater indicating moderate or severe levels)<sup>22,23</sup>. We used multiple logistic regression to  
9 estimate odds ratios with 95% confidence intervals for their associations with non-modifiable and modifiable  
10 variables.  
11  
12

13  
14 Statistical analyses were performed using STATA (version 16).  
15  
16

### 17 18 **Role of sponsor**

19  
20 The study sponsor did not play a role in the study design, collection; analysis, and interpretation of data; in the  
21 writing of the report; or in the decision to submit the paper for publication.  
22  
23  
24

## 25 26 **Results**

### 27 28 **Cohort characteristics**

29  
30 The final number of participants recruited was n=3102. Of these, five were ineligible due to being less than 18  
31 years old. Thus, yielding n=3097 eligible participants. The largest proportion of visitors to the website came  
32 direct to the URL (62%/n=15,218), followed by 25% (n=6068) via Facebook (the remainder through other  
33 websites). The vast majority of respondents accessed the website via a mobile phone (70%/n=17045). The  
34 survey was completed in full by 100% of those who started it, consequently there were no missing data, with the  
35 exception of age, for which 2 participants entered non-numeric values.  
36  
37

38  
39 Table 1 summarises the main characteristics of the participants, alongside comparative data on UK population  
40 values where available. This shows that females were proportionally over-represented and participants older  
41 than 75 years, and from Northern Ireland, were under-represented in the current cohort. Otherwise the sample  
42 was reasonably representative of the wider UK population. The cohort had a mean age of 44 years (standard  
43 deviation=15); and 10% (n=296) from minority ethnic backgrounds. Fifty percent (n=1559) described  
44 themselves as key-workers (39%/n=1198 identifying as working in health and social care). Twenty percent  
45 (n=649) identified themselves as having clinical risk factors which would put them at increased or greatest risk  
46 of COVID-19.  
47  
48  
49  
50  
51  
52  
53  
54  
55

### 56 57 58 **Table 1: Participant Demographics (n=3097) and UK population values**

59  
60

|                                                              | <b>Participants</b> | <b>UK population</b> |
|--------------------------------------------------------------|---------------------|----------------------|
|                                                              | <b>n (%)</b>        | <b>n (%)</b>         |
| <b>Gender <sup>a</sup></b>                                   |                     |                      |
| Male                                                         | 476 (15.4%)         | 32,978,229 (49.4%)   |
| Female                                                       | 2618 (84.5%)        | 33,818,578 (50.6%)   |
| Prefer not to say                                            | 3 (0.1%)            | NR                   |
| <b>Age groups (years) <sup>a</sup></b>                       |                     |                      |
|                                                              |                     | 52,673,433           |
| 18-24                                                        | 364 (11.8%)         | 5,647,655 (10.7%)    |
| 25-34                                                        | 528 (17.1%)         | 9,011,381 (17.1%)    |
| 35-44                                                        | 637 (20.6%)         | 8,415,206 (16.0%)    |
| 45-54                                                        | 690 (22.3%)         | 9,063,137 (17.2%)    |
| 55-64                                                        | 570 (18.4%)         | 8,161,093 (15.4%)    |
| 65-74                                                        | 257 (8.3%)          | 6,687,066 (12.7%)    |
| ≥75                                                          | 49 (1.6%)           | 5,687,895 (10.8%)    |
| <b>Ethnicity <sup>b</sup></b>                                |                     |                      |
| White – British, Irish, other                                | 2796 (90.3%)        | 48,209,395 (86.0%)   |
| Asian/Asian British – Indian, Pakistani, Bangladeshi, other  | 119 (3.8%)          | 3,820,390 (6.8%)     |
| Black/Black British – Caribbean, African, other              | 42 (1.4%)           | 1,864,890 (3.3%)     |
| Chinese/Chinese British                                      | 28 (0.9%)           | 393,141 (0.7%)       |
| Mixed race – White and Black/Black British                   | 19 (0.6%)           | 934,416 (1.7%)       |
| Middle Eastern/Middle Eastern British – Arab, Turkish, other | 23 (0.7%)           | NR                   |
| Mixed race – other                                           | 40 (1.3%)           | 289,984 (0.5%)       |
| Other ethnic group                                           | 25 (0.8%)           | 563,696 (1.0%)       |
| Prefer not to say                                            | 5 (0.2%)            | NR                   |
| <b>Relationship status</b>                                   |                     |                      |
| Single, never married                                        | 574 (18.5%)         | NR                   |
| Single, divorced or widowed                                  | 263 (8.5%)          | NR                   |
| In a relationship/married but living apart                   | 254 (8.2%)          | NR                   |
| In a relationship/married and cohabiting                     | 1981 (64.0%)        | NR                   |
| Prefer not to say                                            | 25 (0.8%)           | NR                   |
| <b>Education (highest level of attainment)</b>               |                     |                      |
| No qualifications                                            | 33 (1.1%)           | NR                   |
| Completed GSCE/CSE/O-levels or equivalent                    | 252 (8.1%)          | NR                   |
| Completed post-16 vocational course                          | 101 (3.3%)          | NR                   |
| A-levels or equivalent (at school until aged 18)             | 403 (13.0%)         | NR                   |
| Undergraduate degree or professional qualification           | 1306 (42.2%)        | NR                   |
| Postgraduate degree                                          | 976 (31.5%)         | NR                   |
| Prefer not to say                                            | 26 (0.8%)           | NR                   |
| <b>Place of residence <sup>a</sup></b>                       |                     |                      |
| South West England                                           | 241 (7.8%)          | 5,624,696 (8.4%)     |
| East Midlands                                                | 762 (24.6%)         | 4,835,928 (7.2%)     |
| Yorkshire and Humber                                         | 293 (9.5%)          | 5,502,967 (8.2%)     |
| North East                                                   | 147 (4.8%)          | 2,669,941 (4.0%)     |
| East of England                                              | 153 (4.9%)          | 6,236,072 (9.3%)     |

1  
2  
3  
4  
5  
6  
7  
8  
9  
10  
11  
12  
13  
14  
15  
16  
17  
18  
19  
20  
21  
22  
23  
24  
25  
26  
27  
28  
29  
30  
31  
32  
33  
34  
35  
36  
37  
38  
39  
40  
41  
42  
43  
44  
45  
46  
47  
48  
49  
50  
51  
52  
53  
54  
55  
56  
57  
58  
59  
60

|                                                                                                                |              |                   |
|----------------------------------------------------------------------------------------------------------------|--------------|-------------------|
| North West                                                                                                     | 357 (11.5%)  | 7,341,196 (11.0%) |
| South East England                                                                                             | 415 (13.4%)  | 9,180,135 (13.7%) |
| Greater London                                                                                                 | 329 (10.6%)  | 8,961,989 (13.4%) |
| West Midlands                                                                                                  | 165 (5.3%)   | 5,934,037 (8.9%)  |
| Northern Ireland                                                                                               | 8 (0.3%)     | 1,893,667 (2.8%)  |
| Wales                                                                                                          | 73 (2.4%)    | 3,152,879 (4.7%)  |
| Scotland                                                                                                       | 154 (5.0%)   | 5,463,300 (8.2%)  |
| <b>Key-worker status</b>                                                                                       |              |                   |
| Health, social care or relevant related support worker                                                         | 1198 (38.7%) | NR                |
| Teacher or childcare worker still travelling in to work                                                        | 70 (2.3%)    | NR                |
| Transport worker still travelling in to work                                                                   | 1 (0.03%)    | NR                |
| Food chain worker (e.g. production, sale, delivery)                                                            | 33 (1.1%)    | NR                |
| Key public services worker (e.g. justice staff, religious staff, public service journalist or mortuary worker) | 22 (0.7%)    | NR                |
| Local or national government worker delivering essential public services                                       | 41 (1.3%)    | NR                |
| Utility worker (e.g. energy, sewerage, postal service)                                                         | 5 (0.2%)     | NR                |
| Public safety or national security worker                                                                      | 11 (0.4%)    | NR                |
| Worker involved in medicines or protective equipment production or distribution                                | 10 (0.3%)    | NR                |
| Other key worker role not listed                                                                               | 168 (5.4%)   | NR                |
| Not a key worker                                                                                               | 1538 (49.7%) | NR                |
| <b>Living alone (or with others)</b>                                                                           |              |                   |
| Living alone                                                                                                   | 406 (13.1%)  | NR                |
| Living with others                                                                                             | 2691 (86.9%) | NR                |
| <b>COVID-19 risk groups</b>                                                                                    |              |                   |
| Most at risk (e.g. suffering from advanced cancer, severe asthma/COPD, etc.)                                   | 121 (3.9%)   | NR                |
| At increased risk (e.g., being pregnant, aged over 70, etc.)                                                   | 528 (17.1%)  | NR                |
| Not at-risk                                                                                                    | 2448 (79.0%) | NR                |

<sup>a</sup> UK population estimates from Office for National Statistics, mid-year estimates 2019.

<sup>b</sup> UK population estimates from 2011 census data.

NR not reported or not available

### Mental health status

Table 2 summarises findings in relation to levels of stress, anxiety and depression in the cohort. The mean values for all measures indicate levels that are higher in women than men and decrease with age. Overall mean values are significantly higher than previously reported population norms<sup>27-29</sup>. For both anxiety and depression the means for the cohort were higher for both genders compared with their respective population norms, and also for all age ranges between 25-64 years. In contrast, both men and women aged over 65 years had anxiety and depression scores consistent with previous population norms. The data suggested no significant differences in stress scores by gender, despite the combined mean score exceeding the population norm. Means scores for depression, anxiety, and stress weighted to reflect the most recent UK age and gender distributions (Office for

1  
2  
3 National Statistics, mid-year estimates 2019) are presented in supplementary appendix 4 and show similarly  
4 elevated levels in both men and women compared to pre-pandemic population norms.  
5

6  
7 Table 3 shows the categorisation of participants in line with established cut-offs for anxiety and depression. This  
8 shows 64% of participants reported symptoms of depression and 57% reported symptoms of anxiety. When  
9 considering the thresholds at which someone would qualify for high intensity psychological support (score of 10  
10 or greater) in the NHS,<sup>26</sup> we observe that 31.6% reported moderate to severe depression and 26% moderate to  
11 severe anxiety.  
12  
13  
14  
15  
16  
17  
18  
19  
20  
21  
22  
23  
24  
25  
26  
27  
28  
29  
30  
31  
32  
33  
34  
35  
36  
37  
38  
39  
40  
41  
42  
43  
44  
45  
46  
47  
48  
49  
50  
51  
52  
53  
54  
55  
56  
57  
58  
59  
60

For peer review only

Table 2: Depression (PHQ-9), anxiety (GAD-7) and stress (PSS-4) scores and published population normative data†

|                           | PHQ-9 score  |            |                | GAD-7 score  |            |                | PSS-4 score  |            |                |
|---------------------------|--------------|------------|----------------|--------------|------------|----------------|--------------|------------|----------------|
|                           | Participants | Norms      | t              | Participants | Norms      | t              | Participants | Norms      | t              |
|                           | Mean (SD)    | Mean (SD)  |                | Mean (SD)    | Mean (SD)  |                | Mean (SD)    | Mean (SD)  |                |
| <b>Total Score</b>        | 7.69 (6.0)   | 2.91 (3.5) | 45.31****      | 6.59 (5.6)   | 2.95 (3.4) | 36.52****      | 6.48 (3.3)   | 6.11 (3.1) | 3.80****       |
| <b>Gender</b>             |              |            |                |              |            |                |              |            |                |
| Male                      | 6.49 (6.1)   | 2.7 (3.5)  | 18.56****      | 5.22 (5.4)   | 2.66 (3.2) | 13.77****      | 5.88 (3.3)   | 5.56 (3.0) | 1.57 (p=0.12)  |
| Female                    | 7.91 (6.0)   | 3.1 (3.5)  | 35.80****      | 6.84 (5.5)   | 3.20 (3.5) | 28.83****      | 6.59 (3.3)   | 6.38 (3.2) | 1.73 (p=0.084) |
| <b>Age groups (years)</b> |              |            |                |              |            |                |              |            |                |
| 18-24                     | 11.24 (6.4)  | ..         | ..             | 9.02 (6.0)   | ..         | ..             | 8.13 (3.3)   | ..         | ..             |
| 25-34                     | 8.74 (5.9)   | 2.3 (3.2)  | 23.56****      | 7.73 (5.6)   | 2.81 (3.3) | 13.85****      | 6.94 (3.3)   | ..         | ..             |
| 35-44                     | 8.23 (6.0)   | 2.6 (3.5)  | 23.45****      | 7.25 (5.7)   | 2.82 (3.3) | 14.09****      | 6.467 (3.2)  | ..         | ..             |
| 45-54                     | 7.32 (5.7)   | 2.8 (3.5)  | 19.24****      | 6.28 (5.3)   | 3.14 (3.4) | 10.71****      | 6.16 (3.0)   | ..         | ..             |
| 55-64                     | 6.35 (5.6)   | 3.2 (3.5)  | 13.03****      | 5.43 (5.1)   | 3.25 (3.6) | 7.36****       | 5.94 (3.2)   | ..         | ..             |
| 65-74                     | 3.83 (4.3)   | 3.3 (3.6)  | 1.95 (p=0.051) | 3.32 (3.8)   | 2.79 (3.2) | 1.92 (p=0.056) | 5.07 (3.0)   | ..         | ..             |
| ≥75                       | 4.39 (5.8)   | 4.4 (3.9)  | 0.02 (p=0.99)  | 2.92 (4.4)   | 3.05 (3.4) | 0.21 (p=0.83)  | 4.80 (3.0)   | ..         | ..             |

† PHQ-9, the 9-item Patient Health Questionnaire;<sup>22</sup> GAD-7, the 7-item Generalized Anxiety Disorder Scale;<sup>23</sup> PSS-4, the 4-item Perceived Stress Scale.<sup>24</sup> Published population normative data for PHQ-9<sup>27</sup>, GAD-7<sup>29</sup>, PSS-4<sup>28</sup>.

\*\*\*\* p<0.0001, \*\*\* p<0.001, \*\* p<0.01, \* p<0.05



**Table 3: Prevalence of depressive and anxiety cases<sup>†</sup>**

| Categories                            | Whole sample                                |      | Male |     | Female |      |      |
|---------------------------------------|---------------------------------------------|------|------|-----|--------|------|------|
|                                       | n                                           | %    | n    | %   | n      | %    |      |
| <b>Depression (PHQ-9<sup>‡</sup>)</b> | <i>No-Minimal Depression (0-4)</i>          | 1125 | 36.3 | 230 | 48.3   | 894  | 34.1 |
|                                       | <i>Mild Depression (5-9)</i>                | 994  | 32.1 | 125 | 26.3   | 868  | 33.2 |
|                                       | <i>Moderate Depression (10-14)</i>          | 525  | 17.0 | 64  | 13.4   | 461  | 17.6 |
|                                       | <i>Moderately Severe Depression (15-19)</i> | 276  | 8.9  | 35  | 7.4    | 241  | 9.2  |
|                                       | <i>Severe Depression (20-27)</i>            | 177  | 5.7  | 22  | 4.6    | 154  | 5.9  |
| <b>Anxiety (GAD-7<sup>‡</sup>)</b>    | <i>No-Minimal Anxiety (0-4)</i>             | 1344 | 43.4 | 276 | 58.0   | 1066 | 40.7 |
|                                       | <i>Mild Anxiety (5-9)</i>                   | 947  | 30.6 | 108 | 22.7   | 839  | 32.0 |
|                                       | <i>Moderate Anxiety (10-14)</i>             | 430  | 13.9 | 44  | 9.2    | 386  | 14.7 |
|                                       | <i>Severe Anxiety (15-21)</i>               | 376  | 12.1 | 48  | 10.1   | 327  | 12.5 |

<sup>†</sup> Cut-offs for categories in line with published guidelines for PHQ-9<sup>23</sup> and GAD-7.<sup>25</sup>

<sup>‡</sup> PHQ-9, the 9-item Patient Health Questionnaire;<sup>19</sup> GAD-7, the 7-item Generalized Anxiety Disorder Scale.<sup>20</sup>

### Individuals at greatest risk of mental health problems: associations with age, gender, ethnicity, living alone and key-worker status

When non-modifiable explanatory variables were included in a multivariable model (Table 4), we observed that for depression (square-root transformed scores), being younger ( $B=-0.30$ , 95% CI: -0.33, -0.27 per decade), female ( $B=0.36$ , 95% CI: 0.25, 0.47), living alone ( $B=0.34$ , 95% CI: 0.25, 0.47) and being in a recognised risk group for COVID-19 (“most at risk” group:  $B=0.56$ , 95% CI: 0.35, 0.77; “increased risk” group:  $B=0.27$ , 95% CI: 0.16, 0.38) were all independently significantly associated with greater levels of depression. This model accounted for 14% of the variance in depression scores. These results were replicated when considering depression as a binary outcome (i.e., cases requiring high intensity intervention versus not) with those in recognised risk groups for COVID-19 being more likely to have a depression score above 10 with 98% increased odds in the “most at risk” group and 63% increased odds in those in the “increased risk” group compared to those in neither risk group. In addition, females had a 50% increased odds of having depression scores above 10 and living alone was associated with a 53% increase.

**Table 4: Regression models showing associations between non-modifiable explanatory variables and depression scores**

|                                            | Regression coefficient (B) | 95% CI Lower | 95% CI Upper | $\beta$ | $p$        |
|--------------------------------------------|----------------------------|--------------|--------------|---------|------------|
| <b>PHQ-9 Total Score<sup>a</sup></b>       |                            |              |              |         |            |
| Age (per decade)                           | -0.30                      | -0.33        | -0.27        | -0.36   | <.0001**** |
| Female                                     | 0.36                       | 0.25         | 0.47         | 0.11    | <.0001**** |
| Live alone                                 | 0.33                       | 0.21         | 0.45         | 0.09    | <.0001**** |
| BAME background                            | 0.03                       | -0.11        | 0.17         | 0.01    | 0.70       |
| Key-worker                                 | 0.08                       | -0.00        | 0.16         | 0.03    | 0.07       |
| Risk Group <sup>b</sup>                    |                            |              |              |         |            |
| Most at risk                               | 0.56                       | 0.35         | 0.77         | 0.09    | <.0001**** |
| Increased risk                             | 0.27                       | 0.16         | 0.38         | 0.08    | <.0001**** |
| <b>Adjusted R<sup>2</sup>=0.14, n=3090</b> |                            |              |              |         |            |
|                                            | Odds Ratio                 | 95% CI Lower | 95% CI Upper | $\beta$ | $p$        |
| <b>PHQ-9 “Cases”<sup>c</sup></b>           |                            |              |              |         |            |
| Age (per decade)                           | 0.65                       | 0.61         | 0.69         | -1.38   | <.0001**** |
| Female                                     | 1.50                       | 1.19         | 1.89         | 0.31    | <.001***   |
| Live alone                                 | 1.53                       | 1.21         | 1.93         | 0.31    | <.001***   |
| BAME background                            | 1.14                       | 0.88         | 1.48         | 0.08    | 0.31       |
| Key-worker                                 | 1.16                       | 0.99         | 1.36         | 0.16    | 0.06       |
| Risk Group <sup>b</sup>                    |                            |              |              |         |            |
| Most at Risk                               | 1.98                       | 1.33         | 2.94         | 0.28    | <.001***   |
| Increased Risk                             | 1.63                       | 1.31         | 2.02         | 0.39    | <.0001**** |
| <b>Pseudo R<sup>2</sup>=0.07, n=3090</b>   |                            |              |              |         |            |

\*\*\*\*  $p<0.0001$ , \*\*\*  $p<0.001$ , \*\*  $p<0.01$ , \*  $p<0.05$

<sup>a</sup> A square-root transformation was applied to the dependent variable.

<sup>b</sup> Comparison reference group “I am in neither risk category”.

<sup>c</sup> a “case” is defined as a PHQ-9 score greater than or equal to 10, at which level someone would qualify for high intensity psychological support in the NHS.

For anxiety (square-root transformed scores) being younger ( $B=-0.26$ , 95% CI: -0.29, -0.23 per decade), female ( $B=0.43$ , 95% CI: 0.32, 0.55), being a key-worker ( $B=0.09$ , 95% CI: 0.01, 0.18), and being in a recognised

COVID-19 risk group (“most at risk” group: B=0.42, 95% CI: 0.20, 0.63; “increased risk” group: B=0.21, 95% CI: 0.10, 0.33) were independently significantly associated with greater levels of anxiety (Table 5). This model accounted for 11% of the variance in anxiety scores and these results were replicated when considering anxiety as a binary outcome (i.e., cases requiring high intensity intervention versus not), with the exception that being a key-worker was no longer a statistically significant independent predictor.

**Table 5: Regression models showing associations between non-modifiable explanatory variables and anxiety scores**

|                                            | B          | 95% CI Lower | 95% CI Upper | $\beta$ | p          |
|--------------------------------------------|------------|--------------|--------------|---------|------------|
| <b>GAD-7 Total Score<sup>a</sup></b>       |            |              |              |         |            |
| Age (per decade)                           | -0.26      | -0.29        | -0.23        | -0.31   | <.0001**** |
| Female                                     | 0.43       | 0.32         | 0.55         | 0.13    | <.0001**** |
| Live alone                                 | -0.04      | -0.16        | 0.08         | -0.01   | 0.51       |
| BAME background                            | 0.02       | -0.12        | 0.16         | 0.00    | 0.81       |
| Key-worker                                 | 0.09       | 0.01         | 0.18         | 0.04    | 0.03*      |
| Risk Group <sup>b</sup>                    |            |              |              |         |            |
| Most at Risk                               | 0.42       | 0.20         | 0.63         | 0.07    | <.001***   |
| Increased Risk                             | 0.21       | 0.10         | 0.33         | 0.07    | <.001***   |
| <b>Adjusted R<sup>2</sup>=0.11, n=3090</b> |            |              |              |         |            |
|                                            | Odds Ratio | 95% CI Lower | 95% CI Upper | $\beta$ | p          |
| <b>GAD-7 “Cases”<sup>c</sup></b>           |            |              |              |         |            |
| Age (per decade)                           | 0.69       | 0.65         | 0.73         | -1.28   | <.0001**** |
| Female                                     | 1.61       | 1.25         | 2.08         | 0.39    | <.001***   |
| Live alone                                 | 1.00       | 0.77         | 1.30         | 0.00    | 0.98       |
| BAME background                            | 1.15       | 0.88         | 1.50         | 0.09    | 0.32       |
| Key-worker                                 | 1.14       | 0.97         | 1.35         | 0.15    | 0.12       |
| Risk Group <sup>b</sup>                    |            |              |              |         |            |
| Most at Risk                               | 1.78       | 1.18         | 2.67         | 0.25    | 0.005**    |
| Increased Risk                             | 1.30       | 1.03         | 1.64         | 0.22    | 0.03*      |
| <b>Pseudo R<sup>2</sup>=0.05, n=3090</b>   |            |              |              |         |            |

\*\*\*\*  $p < 0.0001$ , \*\*\*  $p < 0.001$ , \*\*  $p < 0.01$ , \*  $p < 0.05$

<sup>a</sup> A square-root transformation was applied to the dependent variable.

<sup>b</sup> Comparison reference group “I am in neither risk category”.

<sup>c</sup> a “case” is defined as a GAD-7 score greater than or equal to 10, at which level someone would qualify for high intensity psychological support in the NHS.

For stress scores, being younger (B=-0.56, 95% CI: -0.64, -0.49 per decade), female (B=0.78, 95% CI: 0.46, 1.09), living alone (B=0.46, 95% CI: 0.12, 0.79), being from a BAME background (B=0.44, 95% CI: 0.05, 0.82), and being from an identified COVID-19 risk group (“most at risk” group: B=1.10, 95% CI: 0.51, 1.68; “increased risk” group: B=0.40, 95% CI: 0.09, 0.71) were all independently significantly associated with greater stress scores. In robustness analyses, when removing large standardised residuals (<-3 or >3) being a key-worker was also a statistically significant independent predictor (B=-0.22, 95% CI: -0.45, -0.002) such that being a key-worker was associated with lower stress scores). Together the model accounted for 7% of the variance in stress scores (Table 6).

**Table 6: Regression model showing associations between non-modifiable explanatory variables and stress scores**

|                                            | B     | 95% CI Lower | 95% CI Upper | $\beta$ | <i>p</i>   |
|--------------------------------------------|-------|--------------|--------------|---------|------------|
| <b>PSS-4 Total Score</b>                   |       |              |              |         |            |
| Age (per decade)                           | -0.56 | -0.64        | -0.49        | -0.26   | <.0001**** |
| Female                                     | 0.78  | 0.47         | 1.09         | 0.09    | <.0001**** |
| Live alone                                 | 0.46  | 0.12         | 0.79         | 0.05    | 0.008**    |
| BAME background                            | 0.44  | 0.05         | 0.82         | 0.04    | 0.03*      |
| Key-worker                                 | -0.22 | -0.45        | 0.00         | -0.03   | 0.06       |
| Risk Group <sup>a</sup>                    |       |              |              |         |            |
| Most at Risk                               | 1.10  | 0.51         | 1.68         | 0.06    | <.001***   |
| Increased Risk                             | 0.40  | 0.09         | 0.71         | 0.05    | 0.01*      |
| <b>Adjusted R<sup>2</sup>=0.07, n=3090</b> |       |              |              |         |            |

\*\*\*\*  $p < 0.0001$ , \*\*\*  $p < 0.001$ , \*\*  $p < 0.01$ , \*  $p < 0.05$

<sup>a</sup> Comparison reference group "I am in neither risk category".

### Individuals at greatest risk of mental health problems: associations with perceived risk of COVID-19, perceived loneliness, COVID-19 worry and positive mood

Table 7 shows scores for modifiable explanatory variables (perceived risk, perceived loneliness, COVID-19 worry, and positive mood) across the whole sample, as well as by gender and age-groups.

**Table 7: Loneliness, worry about COVID-19, perceived risk of COVID-19, and positive mood**

|                                   | Whole sample | Gender      |              | Age groups (years) |             |             |             |             |             |             |
|-----------------------------------|--------------|-------------|--------------|--------------------|-------------|-------------|-------------|-------------|-------------|-------------|
|                                   |              | Male        | Female       | 18-24              | 25-34       | 35-44       | 45-54       | 55-64       | 65-74       | ≥75         |
| <b>Loneliness</b>                 |              |             |              |                    |             |             |             |             |             |             |
| Mean (SD)                         | 3.86 (2.7)   | 3.56 (2.7)  | 3.91 (2.7)   | 5.34 (2.7)         | 4.36 (2.7)  | 3.75 (2.7)  | 3.61 (2.8)  | 3.49 (2.7)  | 2.70 (2.1)  | 2.65 (2.4)  |
| <b>Positive mood</b>              |              |             |              |                    |             |             |             |             |             |             |
| Mean (SD)                         | 18.99 (5.1)  | 19.76 (5.1) | 18.85 (5.0)  | 17.68 (4.9)        | 18.82 (5.1) | 18.68 (5.0) | 18.93 (5.1) | 19.35 (5.0) | 20.71 (4.7) | 22.59 (4.5) |
| <b>Perceived risk of COVID-19</b> |              |             |              |                    |             |             |             |             |             |             |
| Mean (SD)                         | 4.75 (2.2)   | 4.46 (2.2)  | 4.80 (2.2)   | 4.10 (2.0)         | 4.92 (2.2)  | 5.14 (2.2)  | 5.01 (2.2)  | 4.78 (2.3)  | 4.20 (2.1)  | 3.00 (1.7)  |
| <b>Worry about COVID-19</b>       |              |             |              |                    |             |             |             |             |             |             |
| No worry (n, %)                   | 512 (16.5%)  | 105 (22.1%) | 406 (15.5%)  | 105 (28.9%)        | 108 (20.5%) | 92 (14.4%)  | 92 (13.3%)  | 65 (11.4%)  | 39 (15.2%)  | 10 (20.4%)  |
| Occasional worry (n, %)           | 2050 (66.2%) | 318 (66.8%) | 1731 (66.1%) | 209 (57.4%)        | 320 (60.6%) | 428 (67.2%) | 468 (67.8%) | 398 (69.8%) | 191 (74.3%) | 36 (73.5%)  |
| Much worry (n, %)                 | 413 (13.3%)  | 40 (8.4%)   | 373 (14.3%)  | 39 (10.7%)         | 77 (14.6%)  | 91 (14.3%)  | 94 (13.7%)  | 85 (14.9%)  | 24 (9.3%)   | 2 (4.1%)    |
| Most worry (n, %)                 | 122 (3.9%)   | 13 (2.7%)   | 108 (4.1%)   | 11 (3.0%)          | 23 (4.4%)   | 26 (4.1%)   | 36 (5.2%)   | 22 (3.9%)   | 3 (1.2%)    | 1 (2.0%)    |

When modifiable explanatory variables were added into the multivariable model for depression: this revealed that greater perceived loneliness (B=0.10, 95% CI: 0.09, 0.12), lower positive mood (B=-0.12, 95% CI: -0.12, -0.11) and greater than occasional worry about getting COVID-19 (much of time: B=0.26, 95% CI: 0.16, 0.36; most of time: B=0.30, 95% CI: 0.12, 0.48), were all independently and significantly associated with greater levels of depression, in addition to age, gender and being in a recognised COVID-19 risk group. The model accounted for 57% of the variance in depression scores. These results were largely replicated when considering depression as a binary outcome although gender and being in the “most at risk” group were no longer statistically significant (Table 8).

**Table 8: Regression models showing associations between modifiable explanatory variables and depression scores**

|                                            | B          | 95% CI Lower | 95% CI Upper | $\beta$ | p          |
|--------------------------------------------|------------|--------------|--------------|---------|------------|
| <b>PHQ-9 Total Score<sup>a</sup></b>       |            |              |              |         |            |
| Age (per decade)                           | -0.19      | -0.21        | -0.17        | -0.24   | <.0001**** |
| Female                                     | 0.19       | 0.10         | 0.28         | 0.06    | <.0001**** |
| Live alone                                 | 0.01       | -0.09        | 0.11         | 0.00    | 0.79       |
| BAME background                            | -0.02      | -0.14        | 0.09         | -0.01   | 0.67       |
| Key-worker                                 | 0.02       | -0.05        | 0.09         | 0.01    | 0.52       |
| Risk Group <sup>b</sup>                    |            |              |              |         |            |
| Most at Risk                               | 0.26       | 0.09         | 0.43         | 0.04    | 0.002**    |
| Increased Risk                             | 0.20       | 0.11         | 0.29         | 0.06    | <.0001**** |
| Perceived loneliness (per unit)            | 0.10       | 0.09         | 0.12         | 0.22    | <.0001**** |
| Positive mood (per unit)                   | -0.12      | -0.12        | -0.11        | -0.48   | <.0001**** |
| COVID-19 worry <sup>c</sup>                |            |              |              |         |            |
| No worry                                   | 0.00       | -0.09        | 0.09         | 0.00    | 0.97       |
| Much of time                               | 0.26       | 0.16         | 0.36         | 0.07    | <.0001**** |
| Most of time                               | 0.30       | 0.12         | 0.48         | 0.05    | 0.001**    |
| Perceived risk of COVID-19 (per unit)      | 0.01       | -0.00        | 0.03         | 0.02    | 0.13       |
| <b>Adjusted R<sup>2</sup>=0.57, n=2494</b> |            |              |              |         |            |
|                                            | Odds Ratio | 95% CI Lower | 95% CI Upper | $\beta$ | p          |
| <b>PHQ-9 “Cases”<sup>d</sup></b>           |            |              |              |         |            |
| Age (per decade)                           | 0.66       | 0.61         | 0.72         | -1.38   | <.0001**** |
| Female                                     | 1.08       | 0.78         | 1.50         | 0.06    | 0.66       |
| Live alone                                 | 0.88       | 0.61         | 1.25         | -0.10   | 0.47       |
| BAME background                            | 0.96       | 0.65         | 1.40         | -0.03   | 0.82       |
| Key-worker                                 | 1.09       | 0.86         | 1.38         | 0.09    | 0.49       |
| Risk Group <sup>b</sup>                    |            |              |              |         |            |
| Most at Risk                               | 1.28       | 0.74         | 2.21         | 0.11    | 0.37       |
| Increased Risk                             | 1.61       | 1.19         | 2.19         | 0.40    | 0.002**    |
| Perceived loneliness (per unit)            | 1.22       | 1.16         | 1.28         | 1.19    | <.0001**** |
| Positive mood (per unit)                   | 0.76       | 0.74         | 0.79         | -3.01   | <.0001**** |
| COVID-19 worry <sup>c</sup>                |            |              |              |         |            |
| No worry                                   | 1.02       | 0.73         | 1.44         | 0.02    | 0.90       |
| Much of time                               | 1.67       | 1.23         | 2.28         | 0.38    | 0.001**    |
| Most of time                               | 2.02       | 1.13         | 3.62         | 0.29    | 0.02*      |
| Perceived risk of COVID-19 (per unit)      | 1.04       | 0.98         | 1.10         | 0.18    | 0.20       |
| <b>Pseudo R<sup>2</sup>=0.36, n=2494</b>   |            |              |              |         |            |

\*\*\*\*  $p < 0.0001$ , \*\*\*  $p < 0.001$ , \*\*  $p < 0.01$ , \*  $p < 0.05$

<sup>a</sup> A square-root transformation was applied to the dependent variable.

<sup>b</sup> Comparison reference group “I am in neither risk category”.

<sup>c</sup> Comparison reference group “I occasionally worry about getting COVID-19”.

<sup>d</sup> a “case” is defined as a PHQ-9 score greater than or equal to 10, at which level someone would qualify for high intensity psychological support in the NHS.

1  
2  
3 For anxiety, the model revealed that greater perceived loneliness (B=0.06, 95% CI: 0.04, 0.07), lower positive  
4 mood (B=-0.12, 95% CI: -0.13, -0.11) and greater perceived risk of COVID-19 (B=0.04, 95% CI: 0.02, 0.05)  
5 were all independently and significantly associated with greater anxiety, in addition to the non-modifiable  
6 factors of being younger, female and living alone. Further, those participants who experienced greater than  
7 occasional worry about getting COVID-19 were significantly more likely to have higher levels of anxiety (much  
8 of time: B=0.57, 95% CI: 0.47, 0.68; most of time: B=0.87, 95% CI: 0.68, 1.06); with those who did not worry  
9 at all about getting COVID-19 being likely to have lower anxiety (B=-0.18, 95% CI: -0.28, -0.09). The model  
10 accounted for 54% of the variance in anxiety scores. These results were largely replicated when considering  
11 anxiety as a binary outcome, although gender and not worrying at all about getting COVID-19 were no longer  
12 statistically significant (Table 9).  
13  
14  
15  
16  
17  
18  
19  
20  
21  
22  
23  
24  
25  
26  
27  
28  
29  
30  
31  
32  
33  
34  
35  
36  
37  
38  
39  
40  
41  
42  
43  
44  
45  
46  
47  
48  
49  
50  
51  
52  
53  
54  
55  
56  
57  
58  
59  
60

**Table 9: Regression models showing associations between modifiable explanatory variables and anxiety**

|                                           | B          | 95% CI Lower | 95% CI Upper | $\beta$ | p          |
|-------------------------------------------|------------|--------------|--------------|---------|------------|
| <b>GAD-7 Total Score<sup>a</sup></b>      |            |              |              |         |            |
| Age (per decade)                          | -0.16      | -0.18        | -0.14        | -0.20   | <.0001**** |
| Female                                    | 0.25       | 0.16         | 0.34         | 0.07    | <.0001**** |
| Live alone                                | -0.25      | -0.36        | -0.15        | -0.07   | <.0001**** |
| BAME background                           | -0.08      | -0.19        | 0.04         | -0.02   | 0.19       |
| Key-worker                                | -0.03      | -0.11        | 0.04         | -0.01   | 0.34       |
| Risk Group <sup>b</sup>                   |            |              |              |         |            |
| Most at Risk                              | 0.02       | -0.15        | 0.19         | 0.00    | 0.83       |
| Increased Risk                            | 0.07       | -0.02        | 0.16         | 0.02    | 0.13       |
| Perceived loneliness (per unit)           | 0.06       | 0.04         | 0.07         | 0.12    | <.0001**** |
| Positive mood (per unit)                  | -0.12      | -0.13        | -0.11        | -0.48   | <.0001**** |
| COVID-19 worry <sup>c</sup>               |            |              |              |         |            |
| No worry                                  | -0.18      | -0.28        | -0.09        | -0.05   | <.001***   |
| Much of time                              | 0.57       | 0.47         | 0.68         | 0.15    | <.0001**** |
| Most of time                              | 0.87       | 0.68         | 1.06         | 0.13    | <.0001**** |
| Perceived risk of COVID-19 (per unit)     | 0.04       | 0.02         | 0.05         | 0.06    | <.0001**** |
| <b>Adjusted R<sup>2</sup>=.54, n=2494</b> |            |              |              |         |            |
|                                           | Odds Ratio | 95% CI Lower | 95% CI Upper | $\beta$ | p          |
| <b>GAD-7 “Cases”<sup>d</sup></b>          |            |              |              |         |            |
| Age (per decade)                          | 0.69       | 0.63         | 0.76         | -1.32   | <.0001**** |
| Female                                    | 1.17       | 0.82         | 1.67         | 0.13    | 0.38       |
| Live alone                                | 0.67       | 0.46         | 0.99         | -0.31   | 0.04*      |
| BAME background                           | 0.96       | 0.65         | 1.44         | -0.03   | 0.86       |
| Key-worker                                | 0.89       | 0.70         | 1.15         | -0.13   | 0.38       |
| Risk Group <sup>b</sup>                   |            |              |              |         |            |
| Most at Risk                              | 0.89       | 0.51         | 1.55         | -0.05   | 0.67       |
| Increased Risk                            | 0.92       | 0.66         | 1.29         | -0.07   | 0.64       |
| Perceived loneliness (per unit)           | 1.11       | 1.06         | 1.17         | 0.68    | <.0001**** |
| Positive mood (per unit)                  | 0.77       | 0.75         | 0.80         | -3.08   | <.0001**** |
| COVID-19 worry <sup>c</sup>               |            |              |              |         |            |
| No worry                                  | 0.75       | 0.52         | 1.09         | -0.24   | 0.13       |
| Much of time                              | 3.90       | 2.88         | 5.29         | 1.07    | <.0001**** |
| Most of time                              | 11.63      | 5.91         | 22.90        | 1.06    | <.0001**** |
| Perceived risk of COVID-19 (per unit)     | 1.07       | 1.01         | 1.14         | 0.35    | 0.02*      |
| <b>Pseudo R<sup>2</sup>=0.36, n=2494</b>  |            |              |              |         |            |

\*\*\*\*  $p < 0.0001$ , \*\*\*  $p < 0.001$ , \*\*  $p < 0.01$ , \*  $p < 0.05$

<sup>a</sup> A square-root transformation was applied to the dependent variable.

<sup>b</sup> Comparison reference group “I am in neither risk category”.

<sup>c</sup> Comparison reference group “I occasionally worry about getting COVID-19”.

<sup>d</sup> a “case” is defined as a GAD-7 score greater than or equal to 10, at which level someone would qualify for high intensity psychological support in the NHS.

The multivariable model for stress scores showed that greater perceived loneliness (B=0.19, 95% CI: 0.15, 0.23), lower positive mood (B=-0.38, 95% CI: -0.40, -0.36), greater than occasional worry about getting COVID-19 (much of time: B=0.37, 95% CI: 0.10, 0.63; most of time: B=1.02, 95% CI: 0.54, 1.50), and greater perceived risk of getting COVID-19 (B=0.06, 95% CI: 0.02, 0.11) were all independently and significantly associated with greater stress, in addition to being younger, female, living alone and not being a key-worker. In robustness analyses, when removing large standardised residuals (<-3 or >3) having a BAME background was also a statistically significant independent predictor (B=0.29, 95% CI: 0.00, 0.58). This model accounted for 57% of the variance in stress scores (Table 10).



**Table 10: Regression model showing associations between modifiable explanatory variables and stress scores**

|                                           | B     | 95% CI Lower | 95% CI Upper | $\beta$ | p          |
|-------------------------------------------|-------|--------------|--------------|---------|------------|
| <b>PSS-4 Total Score</b>                  |       |              |              |         |            |
| Age (per decade)                          | -0.25 | -0.31        | -0.18        | -0.12   | <.0001**** |
| Female                                    | 0.35  | 0.12         | 0.59         | 0.04    | 0.003**    |
| Live alone                                | -0.41 | -0.67        | -0.14        | -0.04   | 0.002**    |
| BAME background                           | 0.26  | -0.04        | 0.55         | 0.02    | 0.09       |
| Key-worker                                | -0.39 | -0.58        | -0.21        | -0.06   | <.0001**** |
| Risk Group <sup>b</sup>                   |       |              |              |         |            |
| Most at Risk                              | 0.03  | -0.41        | 0.47         | 0.00    | 0.90       |
| Increased Risk                            | 0.02  | -0.21        | 0.26         | 0.00    | 0.83       |
| Perceived loneliness (per unit)           | 0.19  | 0.15         | 0.23         | 0.15    | <.0001**** |
| Positive mood (per unit)                  | -0.38 | -0.40        | -0.36        | -0.60   | <.0001**** |
| COVID-19 worry <sup>a</sup>               |       |              |              |         |            |
| No worry                                  | -0.05 | -0.30        | 0.19         | -0.01   | 0.68       |
| Much of time                              | 0.37  | 0.10         | 0.63         | 0.04    | 0.007**    |
| Most of time                              | 1.02  | 0.54         | 1.50         | 0.06    | <.0001**** |
| Perceived risk of COVID-19 (per unit)     | 0.06  | 0.02         | 0.11         | 0.04    | 0.004**    |
| <b>Adjusted R<sup>2</sup>=.57, n=2494</b> |       |              |              |         |            |

\*\*\*\*  $p < 0.0001$ , \*\*\*  $p < 0.001$ , \*\*  $p < 0.01$ , \*  $p < 0.05$

<sup>a</sup> Comparison reference group "I occasionally worry about getting COVID-19".

<sup>b</sup> Comparison reference group "I am in neither risk category".

## Discussion

We report findings from a community cohort study established in the UK to examine the mental health consequences of the COVID-19 pandemic. Our results pertain to the experiences of people within the first four to six weeks of social distancing measures being introduced, and focus on self-reported depression, anxiety and stress scores. The findings indicated that mean levels of depression, anxiety and stress significantly exceeded previously published population norms.<sup>27-29</sup> Models examining the relationship between these mental health outcomes and non-modifiable explanatory factors accounted for only a modest proportion of the variance (7-14%). Increased depression was associated with being younger, female, living alone and being in a recognised COVID-19 risk group; increased anxiety was associated with being younger, female and being in a recognised risk group; and increased stress was associated with being younger, female, living alone, being from a BAME background and a recognised risk group. In contrast, when we added the hypothesised modifiable variables into our multivariable models we observed that the final models accounted for a much larger proportion of the variance (54-57%) with significant independent effects emerging for lower positive mood and greater perceived loneliness and worry about getting COVID-19 associated with higher scores for all three outcomes, as well as greater perceived risk of COVID-19 emerging as significant for anxiety and stress.

These findings highlight a number of issues worthy of discussion. First, we acknowledge several limitations.

These include the cross-sectional design which impedes an analysis of cause and effect; the absence of information on pre-existing mental health conditions which are likely to impact on the severity and prevalence

1  
2  
3 of psychological morbidity<sup>1</sup> and the limited generalisability of our cohort due to the self-selected community  
4 cohort design. Regarding the latter, several potential sources of sampling biases exist. This includes that the  
5 spread of participants across the UK was limited; and the potential for participants to be drawn to the research  
6 because of an interest in and experience of mental health difficulties. Thus, this group may have been over-  
7 represented. Furthermore, typical of previous online surveys concerned with mental health, women were over-  
8 represented in our sample.<sup>30</sup> Thus, while our comparisons with UK census and Office of National Statistics data  
9 (see Table 1) indicated that across many parameters our cohort were largely representative of the UK  
10 population; and our supplementary analysis (appendix 4) weighted by the age and gender distribution in the UK  
11 in 2019 confirmed the presence of increased stress, anxiety and depression compared with pre-pandemic norms,  
12 we acknowledge that these areas of sampling bias have implications for the generalisability of our findings.  
13 Finally, we also note that our comparisons with normative data were limited to the most recent data we were  
14 able to access. For stress and depression, comparisons were made with data reported in 2013, but for anxiety it  
15 was 2008. We acknowledge there may have been population shifts in mental health in the intervening years  
16 which may account, in part, for some of the increase in mental health difficulties reported here.

17  
18 A second observation is that both mean scores and measures of case-ness suggest that the COVID-19 pandemic  
19 may have contributed to an increased prevalence of mental health difficulties in the UK. This is true for  
20 depression, generalised anxiety disorder and stress and is in keeping with observations from other countries.<sup>3,4</sup>  
21 Indeed, the proportion of participants who would require intensive support for depression and anxiety in the  
22 NHS does not compare favourably with recent historical estimates of the prevalence of mental health problems  
23 in the UK. For example, the 2014 ONS report on adult psychiatric morbidity reported a prevalence of 17% for  
24 six different common mental disorders.<sup>31</sup> The prevalence of depression alone in the context of this pandemic is  
25 almost double this. However, what we can't determine from this work is whether the apparent increase in  
26 psychological morbidity is an expected, but short-term response to the pandemic. Or if this distress is sustained  
27 over time and likely to warrant intervention. Longitudinal follow-ups of this and other cohorts will provide  
28 valuable data in this regard. Furthermore, as noted above, we also cannot be certain how much of the increase in  
29 psychological morbidity is attributable to the pandemic or a more general trend towards increased mental health  
30 concerns that has been suggested by some in recent years.<sup>32</sup>

31  
32 Third, the non-modifiable explanatory variables significantly associated with increased levels for all three of our  
33 mental health outcomes were being younger, female and in a recognised COVID-19 risk group. The findings  
34 regarding gender and age are consistent with unpublished data from another UK community cohort recruited  
35  
36  
37  
38  
39  
40  
41  
42  
43  
44  
45  
46  
47  
48  
49  
50  
51  
52  
53  
54  
55  
56  
57  
58  
59  
60

1  
2  
3 during the COVID-19 pandemic with a similar gender profile to our own,<sup>33</sup> suggesting that these groups may  
4 be the most in need of intervention. They are also, in part, consistent with our hypothesis that the greatest  
5 psychological morbidity would be observed in individuals at greatest risk of COVID-19. But they also clearly  
6 illustrate that for some (e.g., younger participants), the experience of psychological morbidity may be unrelated  
7 to their actual risk of COVID-19. These results may reflect the fact that the pandemic has resulted in a panoply  
8 of challenges likely to affect mental health that go beyond the disease itself. It could be hypothesised, for  
9 example, that some of the more immediate consequences such as unemployment, financial concerns and  
10 increased domestic violence would disproportionately affect younger people and women and this may explain  
11 our findings.

12  
13 A fourth, and related issue, is that although being younger, female and in a recognised COVID-19 risk group  
14 were consistently associated with poorer mental health, the relationship was modest, accounting for, at best,  
15 14% of the variance. In contrast, the modifiable explanatory measures when added to the multivariable models  
16 accounted for 54-57% of the total variance, with greater perceived loneliness, worry about getting COVID-19  
17 and lower positive mood strongly associated with all three outcomes. These findings are encouraging as they  
18 suggest that there is considerable potential to develop interventions to mitigate the mental health effects of the  
19 pandemic.<sup>34</sup> But they also signal a role for public health interventions. For example, a robust and effective  
20 contact tracing system with regional level data could do much to allay people's worries about contracting the  
21 infection and also increase social participation which, in turn, would benefit perceived loneliness. Clear and  
22 consistent public health messaging regarding the use of face masks to reduce infection risk could be another  
23 effective strategy. Viewed this way, these public health interventions could simultaneously reduce the risk of  
24 COVID-19 infection as well as help to manage some of the concomitant psychological distress. There is, of  
25 course, still likely to be increased demand for mental health services in response to the pandemic. However, our  
26 data suggest that public health control measures commonly used in response to epidemics and pandemics may  
27 also have a role to play.

28  
29 A final issue concerns the effects of the pandemic beyond mental health. It is well known that when negative  
30 mood states persist over time they result in the dysregulation of physiological systems involved in the regulation  
31 of the immune system.<sup>35</sup> Thus, there exists significant potential for the psychological harm inflicted by the  
32 pandemic to translate into physical harm. This could include an increased susceptibility to the virus, worse  
33 outcomes if infected, or indeed poorer responses to vaccinations in the future.<sup>35</sup> Studies providing longitudinal  
34  
35  
36  
37  
38  
39  
40  
41  
42  
43  
44  
45  
46  
47  
48  
49  
50  
51  
52  
53  
54  
55  
56  
57  
58  
59  
60

1  
2  
3 data on the prevalence of psychological morbidity and appropriate biomarkers (e.g., cortisol) will be required to  
4 determine whether the risks to physical health go beyond the hypothetical.  
5

6  
7 In conclusion, we are among the first to provide evidence from a large cohort on the mental health impact of the  
8 COVID-19 pandemic on people in the UK. We provide early evidence that women, young people and  
9 individuals in recognised COVID-19 risk groups may be at particular risk. However, the strongest associations  
10 were with psychological characteristics such as worry about contracting COVID-19 and perceived loneliness.  
11  
12

13 These findings, we suggest, indicate that robust public health measures, such as effective contact tracing, which  
14 reduce the public's concerns regarding risk of infection, could do much to ameliorate mental health difficulties.  
15  
16  
17  
18  
19  
20  
21  
22  
23  
24  
25  
26  
27  
28  
29  
30  
31  
32  
33  
34  
35  
36  
37  
38  
39  
40  
41  
42  
43  
44  
45  
46  
47  
48  
49  
50  
51  
52  
53  
54  
55  
56  
57  
58  
59  
60

For peer review only

### Contributor statements

**Ru Jia:** study design, coordination and management of recruitment, preparation, analysis and interpretation of data, preparation and review of final manuscript.

**Kieran Ayling:** study design, coordination and management of recruitment, preparation, analysis and interpretation of data preparation and review of final manuscript.

**Trudie Chalder:** study design, analysis and interpretation of data preparation and review of final manuscript.

**Adam Massey:** study design, coordination and management of recruitment, preparation, analysis and interpretation of data and review of final manuscript.

**Elizabeth Broadbent:** study design, interpretation of data and review of final manuscript

**Carol Coupland:** study design, analysis and interpretation of data, preparation and review of final manuscript

**Kavita Vedhara:** research lead and overall guarantor for the article contributing to study design, coordination and management of recruitment, preparation, analysis and interpretation of data and preparation of manuscript.

As corresponding author, KV had access to all the data in the study and had final responsibility for the decision to submit for publication.

**PPI:** We would like to acknowledge the valuable contributions of our PPI group in supporting the design of our recruitment strategy, contents of the survey and the communication of findings to study participants.

### No competing interests

All authors have completed the ICMJE uniform disclosure form at [www.icmje.org/coi\\_disclosure.pdf](http://www.icmje.org/coi_disclosure.pdf) and declare: no support from any organisation for the submitted work; no financial relationships with any organisations that might have an interest in the submitted work in the previous three years; no other relationships or activities that could appear to have influenced the submitted work.

### Acknowledgements and Funding

KA was supported by funding from the National Institute for Health Research School for Primary Care Research (NIHR SPCR). The views expressed are those of the author(s) and not necessarily those of the NIHR, the NHS or the Department of Health.

TC acknowledges the financial support of the Department of Health via the National Institute for Health Research (NIHR) Specialist Biomedical Research Centre for Mental Health award to the South London and Maudsley NHS Foundation Trust (SLaM) and the Institute of Psychiatry at King's College London. The views

1  
2  
3 expressed are those of the authors and not necessarily those of the NHS, the NIHR or the Department of Health  
4 and Social Care. No other funding supported the work described in this manuscript.  
5  
6  
7

### 8 9 **Transparency declaration**

10 The lead author affirms that this manuscript is an honest, accurate, and transparent account of the study being  
11 reported; that no important aspects of the study have been omitted; and that any discrepancies from the study as  
12 planned have been explained.  
13  
14  
15

### 16 17 18 **Data sharing**

19 Data will be deposited in the University of Nottingham data archive. Access to this dataset will be embargoed  
20 for a period of 12 months to permit planned analyses of the dataset. After that it may be shared with the consent  
21 of the Chief Investigator. Extra data is available by contacting [kavita.vedhara@nottingham.ac.uk](mailto:kavita.vedhara@nottingham.ac.uk).  
22  
23  
24  
25

### 26 27 28 **Dissemination statement**

29 We plan to disseminate results to study participants  
30  
31  
32  
33  
34  
35  
36  
37  
38  
39  
40  
41  
42  
43  
44  
45  
46  
47  
48  
49  
50  
51  
52  
53  
54  
55  
56  
57  
58  
59  
60

## References

1. Holmes EA, O'Connor RC, Perry VH, et al. Multidisciplinary research priorities for the COVID-19 pandemic: a call for action for mental health science. *The lancet Psychiatry* 2020;7(6):547-60. doi: 10.1016/s2215-0366(20)30168-1 [published Online First: 2020/04/19]
2. Candan SA, Elibol N, Abdullahi A. Consideration of prevention and management of long-term consequences of post-acute respiratory distress syndrome in patients with COVID-19. *Physiotherapy Theory and Practice* 2020;36(6):663-68. doi: 10.1080/09593985.2020.1766181
3. Liu S, Yang L, Zhang C, et al. Online mental health services in China during the COVID-19 outbreak. *The lancet Psychiatry* 2020;7(4):e17-e18. doi: 10.1016/s2215-0366(20)30077-8 [published Online First: 2020/02/23]
4. Tian F, Li H, Tian S, et al. Psychological symptoms of ordinary Chinese citizens based on SCL-90 during the level I emergency response to COVID-19. *Psychiatry research* 2020;288:112992. doi: 10.1016/j.psychres.2020.112992 [published Online First: 2020/04/18]
5. Jeong H, Yim HW, Song Y-J, et al. Mental health status of people isolated due to Middle East Respiratory Syndrome. *Epidemiol Health* 2016;38:e2016048-e48. doi: 10.4178/epih.e2016048
6. Chan SM, Chiu FK, Lam CW, et al. Elderly suicide and the 2003 SARS epidemic in Hong Kong. *International journal of geriatric psychiatry* 2006;21(2):113-8. doi: 10.1002/gps.1432 [published Online First: 2006/01/18]
7. Williams SN, Armitage CJ, Tampe T, et al. Public perceptions and experiences of social distancing and social isolation during the COVID-19 pandemic: a UK-based focus group study. *BMJ Open* 2020;10(7):e039334. doi: 10.1136/bmjopen-2020-039334
8. <https://www.ons.gov.uk/peoplepopulationandcommunity/healthandsocialcare/causesofdeath/bulletins/coronaviruscovid19relateddeathsbyoccupationenglandandwales/deathsregistereduptoandincluding20april2020> [accessed 11/05/20].
9. Zhou F, Yu T, Du R, et al. Clinical course and risk factors for mortality of adult inpatients with COVID-19 in Wuhan, China: a retrospective cohort study; [published correction appears in *Lancet*. 2020 Mar 28;395(10229):1038]. . *The Lancet* 2020;395(10229):p1054-62.

- 1  
2  
3 10. Khunti K, Singh AK, Pareek M, et al. Is ethnicity linked to incidence or outcomes of covid-19? *BMJ*  
4 2020;369:m1548. doi: 10.1136/bmj.m1548  
5  
6  
7 11. Folkman S. Positive psychological states and coping with severe stress. *Social science & medicine (1982)*  
8 1997;45(8):1207-21. doi: 10.1016/s0277-9536(97)00040-3 [published Online First: 1997/09/25]  
9  
10  
11 12. Bults M, Beaujean DJ, de Zwart O, et al. Perceived risk, anxiety, and behavioural responses of the general  
12 public during the early phase of the Influenza A (H1N1) pandemic in the Netherlands: results of three  
13 consecutive online surveys. *BMC public health* 2011;11:2. doi: 10.1186/1471-2458-11-2 [published Online  
14 First: 2011/01/05]  
15  
16  
17 13. Salkovskis PM, Rimes KA, Warwick HM, et al. The Health Anxiety Inventory: development and validation  
18 of scales for the measurement of health anxiety and hypochondriasis. *Psychological medicine* 2002;32(5):843-  
19 53. doi: 10.1017/s0033291702005822 [published Online First: 2002/08/13]  
20  
21  
22 14. Gao J, Zheng P, Jia Y, et al. Mental health problems and social media exposure during COVID-19 outbreak.  
23 *PLoS One* 2020;15(4):e0231924-e24. doi: 10.1371/journal.pone.0231924  
24  
25  
26 15. Wang J, Mann F, Lloyd-Evans B, et al. Associations between loneliness and perceived social support and  
27 outcomes of mental health problems: a systematic review. *BMC psychiatry* 2018;18(1):156. doi:  
28 10.1186/s12888-018-1736-5 [published Online First: 2018/05/31]  
29  
30  
31 16. Leigh-Hunt N, Bagguley D, Bash K, et al. An overview of systematic reviews on the public health  
32 consequences of social isolation and loneliness. *Public health* 2017;152:157-71. doi:  
33 10.1016/j.puhe.2017.07.035 [published Online First: 2017/09/16]  
34  
35  
36 17. Pressman SD, Jenkins BN, Moskowitz JT. Positive Affect and Health: What Do We Know and Where Next  
37 Should We Go? *Annual review of psychology* 2019;70:627-50. doi: 10.1146/annurev-psych-010418-102955  
38 [published Online First: 2018/09/28]  
39  
40  
41 18. Larsen JT, Hershfield HE, Stastny BJ, et al. On the relationship between positive and negative affect: Their  
42 correlation and their co-occurrence. *Emotion (Washington, DC)* 2017;17(2):323-36. doi: 10.1037/emo0000231  
43 [published Online First: 2016/10/28]  
44  
45  
46 19. Dejonckheere E, Mestdagh M, Verdonck S, et al. The relation between positive and negative affect becomes  
47 more negative in response to personally relevant events. *Emotion (Washington, DC)* 2019 doi:  
48 10.1037/emo0000697 [published Online First: 2019/11/08]  
49  
50  
51  
52  
53  
54  
55  
56  
57  
58  
59  
60



- 1  
2  
3 20. Schotanus-Dijkstra M, Ten Have M, Lamers SMA, et al. The longitudinal relationship between flourishing  
4 mental health and incident mood, anxiety and substance use disorders. *Eur J Public Health* 2017;27(3):563-68.  
5  
6 doi: 10.1093/eurpub/ckw202  
7  
8  
9 21. Schotanus-Dijkstra M, Keyes CLM, de Graaf R, et al. Recovery from mood and anxiety disorders: The  
10 influence of positive mental health. *Journal of affective disorders* 2019;252:107-13. doi:  
11  
12 10.1016/j.jad.2019.04.051 [published Online First: 2019/04/14]  
13  
14 22. Kroenke K, Spitzer RL, Williams JB, et al. The Patient Health Questionnaire Somatic, Anxiety, and  
15 Depressive Symptom Scales: a systematic review. *General hospital psychiatry* 2010;32(4):345-59. doi:  
16  
17 10.1016/j.genhosppsy.2010.03.006 [published Online First: 2010/07/17]  
18  
19 23. Spitzer RL, Kroenke K, Williams JB, et al. A brief measure for assessing generalized anxiety disorder: the  
20 GAD-7. *Archives of internal medicine* 2006;166(10):1092-7. doi: 10.1001/archinte.166.10.1092 [published  
21  
22 Online First: 2006/05/24]  
23  
24 24. Cohen S. Perceived stress in a probability sample of the United States. *The social psychology of health*.  
25  
26 Thousand Oaks, CA, US: Sage Publications, Inc 1988:31-67.  
27  
28 25. Diener E, Wirtz D, Tov W, et al. New Well-being Measures: Short Scales to Assess Flourishing and Positive  
29 and Negative Feelings. *Social Indicators Research* 2010;97:143-56.  
30  
31 26. Lumley T, Diehr P, Emerson S, et al. The Importance of the Normality Assumption in Large Public Health  
32 Data Sets. *Annual Review of Public Health* 2002;23(1):151-69. doi:  
33  
34 10.1146/annurev.publhealth.23.100901.140546  
35  
36 27. Kocalevent RD, Hinz A, Brähler E. Standardization of the depression screener patient health questionnaire  
37 (PHQ-9) in the general population. *General hospital psychiatry* 2013;35(5):551-5. doi:  
38  
39 10.1016/j.genhosppsy.2013.04.006 [published Online First: 2013/05/15]  
40  
41 28. Warttig SL, Forshaw MJ, South J, et al. New, normative, English-sample data for the Short Form Perceived  
42 Stress Scale (PSS-4). *Journal of health psychology* 2013;18(12):1617-28. doi: 10.1177/1359105313508346  
43  
44 [published Online First: 2013/10/25]  
45  
46 29. Löwe B, Decker O, Müller S, et al. Validation and standardization of the Generalized Anxiety Disorder  
47 Screener (GAD-7) in the general population. *Medical care* 2008;46(3):266-74. doi:  
48  
49 10.1097/MLR.0b013e318160d093 [published Online First: 2008/04/05]  
50  
51  
52  
53  
54  
55  
56  
57  
58  
59  
60

- 1  
2  
3 30. Owen JE, Bantum EOC, Criswell K, et al. Representativeness of two sampling procedures for an internet  
4 intervention targeting cancer-related distress: a comparison of convenience and registry samples. *J Behav Med*  
5 2014;37(4):630-41. doi: 10.1007/s10865-013-9509-6 [published Online First: 2013/05/04]  
6  
7  
8  
9 31. [https://files.digital.nhs.uk/pdf/q/3/mental\\_health\\_and\\_wellbeing\\_in\\_england\\_full\\_report.pdf](https://files.digital.nhs.uk/pdf/q/3/mental_health_and_wellbeing_in_england_full_report.pdf) [accessed  
10 03/05/20].  
11  
12 32. Hidaka BH. Depression as a disease of modernity: explanations for increasing prevalence. *Journal of*  
13 *affective disorders* 2012;140(3):205-14. doi: 10.1016/j.jad.2011.12.036 [published Online First: 2012/01/12]  
14  
15  
16 33. <https://www.marchnetwork.org/research> [accessed 04/05/20].  
17  
18 34. Masi CM, Chen H-Y, Hawkley LC, et al. A meta-analysis of interventions to reduce loneliness. *Pers Soc*  
19 *Psychol Rev* 2011;15(3):219-66. doi: 10.1177/1088868310377394 [published Online First: 2010/08/17]  
20  
21  
22 35. <https://thepsychologist.bps.org.uk/we-will-have-live-risk-covid-19-psychology-has-much-say-about-risk>  
23 [accessed 06/05/2020].  
24  
25  
26  
27  
28  
29  
30  
31  
32  
33  
34  
35  
36  
37  
38  
39  
40  
41  
42  
43  
44  
45  
46  
47  
48  
49  
50  
51  
52  
53  
54  
55  
56  
57  
58  
59  
60

1  
2  
3 **Supplementary Appendices**  
4

5 **Appendix 1: Details of modifiable and non-modifiable explanatory factors**

6 **Appendix 2: Results from univariable regressions**  
7

8 **Appendix 3: Multivariable regression models, excluding perceived risk of COVID-19**  
9

10 **Appendix 4: Boxplots of outcome variables**

11 **Appendix 5: Means for depression, anxiety and stress with overall means weighted to mid-2019 UK**  
12 **population distribution**  
13  
14

---

15  
16  
17  
18  
19  
20  
21  
22  
23  
24  
25  
26  
27  
28  
29  
30  
31  
32  
33  
34  
35  
36  
37  
38  
39  
40  
41  
42  
43  
44  
45  
46  
47  
48  
49  
50  
51  
52  
53  
54  
55  
56  
57  
58  
59  
60

For peer review only

Appendix 1: Summary of modifiable and non-modifiable explanatory factors considered in the analysis

Table S1: Modifiable and non-modifiable explanatory factors considered in the analysis

|                        | Question/scale                 | Response(s)                                                                                                                                                                                                                                                                                                                                               |
|------------------------|--------------------------------|-----------------------------------------------------------------------------------------------------------------------------------------------------------------------------------------------------------------------------------------------------------------------------------------------------------------------------------------------------------|
| Non-modifiable factors |                                |                                                                                                                                                                                                                                                                                                                                                           |
| Gender*                | What was your gender at birth? | Male<br>Female<br>Other<br>Prefer not to say                                                                                                                                                                                                                                                                                                              |
| Age                    | How old are you?               | ..                                                                                                                                                                                                                                                                                                                                                        |
| Ethnicity*             | What is your ethnicity         | White – British, Irish, other<br>Asian/Asian British – Indian, Pakistani, Bangladeshi, other<br>Black/Black British – Caribbean, African, other<br>Chinese/Chinese British<br>Mixed race – White and Black/Black British<br>Middle Eastern/Middle Eastern British – Arab, Turkish, other<br>Mixed race – other<br>Other ethnic group<br>Prefer not to say |
| Key-worker status      |                                | Health, social care ore relevant related support worker<br>Teacher or childcare worker still travelling in to work                                                                                                                                                                                                                                        |

|    |                                          |                                            |                                                                                               |
|----|------------------------------------------|--------------------------------------------|-----------------------------------------------------------------------------------------------|
| 1  |                                          |                                            |                                                                                               |
| 2  |                                          |                                            |                                                                                               |
| 3  |                                          | Are you currently fulfilling any of the    | Transport worker still travelling in to work                                                  |
| 4  |                                          | government's identified 'key worker'       | Food chain worker (e.g. production, sale, delivery)                                           |
| 5  |                                          | roles?                                     | Key public services worker (e.g. justice staff, religious staff, public service journalist or |
| 6  |                                          |                                            | mortuary worker)                                                                              |
| 7  |                                          |                                            | Local or national government worker delivering essential public services                      |
| 8  |                                          |                                            | Utility worker (e.g. energy, sewerage, postal service)                                        |
| 9  |                                          |                                            | Public safety or national security worker                                                     |
| 10 |                                          |                                            | Worker involved in medicines or protective equipment production or distribution               |
| 11 |                                          |                                            | Other 'key worker' role not listed                                                            |
| 12 |                                          |                                            | None of these                                                                                 |
| 13 |                                          |                                            |                                                                                               |
| 14 |                                          |                                            |                                                                                               |
| 15 |                                          |                                            |                                                                                               |
| 16 |                                          |                                            |                                                                                               |
| 17 |                                          |                                            |                                                                                               |
| 18 |                                          |                                            |                                                                                               |
| 19 |                                          |                                            |                                                                                               |
| 20 |                                          |                                            |                                                                                               |
| 21 | Living alone/with others                 | Do you live with someone?                  | Yes                                                                                           |
| 22 |                                          |                                            | No                                                                                            |
| 23 |                                          |                                            |                                                                                               |
| 24 | Recognised risk group for                | Which of these 3 COVID-19 risk groups      | I am most at risk (e.g., suffering from advanced cancer, severe asthma/COPD, etc.)            |
| 25 | COVID-19                                 | do you think you are in?                   | I am at increased risk (e.g., being pregnant, aged over 70, etc.)                             |
| 26 |                                          |                                            | I am in neither risk category.                                                                |
| 27 |                                          |                                            |                                                                                               |
| 28 |                                          |                                            |                                                                                               |
| 29 |                                          |                                            |                                                                                               |
| 30 | Modifiable factors                       |                                            |                                                                                               |
| 31 |                                          |                                            |                                                                                               |
| 32 | <i>Perceived loneliness</i> <sup>†</sup> | On a scale of 1-10, how lonely have you    | 1 (Not at all lonely) - 10 (Extremely lonely)                                                 |
| 33 |                                          | felt over the past 2 weeks?                |                                                                                               |
| 34 |                                          |                                            |                                                                                               |
| 35 | <i>Perceived risk of COVID-19</i>        | On a scale of 1-10, what do you believe    | 1 (I don't think I will get it) - 10 (I know I will most certainly get it)                    |
| 36 |                                          | your risk of getting COVID-19 is?          |                                                                                               |
| 37 |                                          |                                            |                                                                                               |
| 38 | <i>Positive mood</i> <sup>‡</sup>        | In the past 2 weeks, I have felt Positive. | 1=Very rarely or never/ 2=Rarely/ 3=Sometimes/ 4=Often/ 5=Very often or always                |
| 39 |                                          |                                            |                                                                                               |
| 40 |                                          |                                            |                                                                                               |
| 41 |                                          |                                            |                                                                                               |
| 42 |                                          |                                            |                                                                                               |
| 43 |                                          |                                            |                                                                                               |
| 44 |                                          |                                            |                                                                                               |
| 45 |                                          |                                            |                                                                                               |
| 46 |                                          |                                            |                                                                                               |

1  
2  
3  
4  
5  
6  
7  
8  
9  
10  
11  
12  
13  
14  
15  
16  
17  
18  
19  
20  
21  
22  
23  
24  
25  
26  
27  
28  
29  
30  
31  
32  
33  
34  
35  
36  
37  
38  
39  
40  
41  
42  
43  
44  
45  
46

|                                             |                                                                                                                                     |
|---------------------------------------------|-------------------------------------------------------------------------------------------------------------------------------------|
| In the past 2 weeks, I have felt Good.      | 1=Very rarely or never/ 2=Rarely/ 3=Sometimes/ 4=Often/ 5=Very often or always                                                      |
| In the past 2 weeks, I have felt Pleasant.  | 1=Very rarely or never/ 2=Rarely/ 3=Sometimes/ 4=Often/ 5=Very often or always                                                      |
| In the past 2 weeks, I have felt Happy.     | 1=Very rarely or never/ 2=Rarely/ 3=Sometimes/ 4=Often/ 5=Very often or always                                                      |
| In the past 2 weeks, I have felt Joyful.    | 1=Very rarely or never/ 2=Rarely/ 3=Sometimes/ 4=Often/ 5=Very often or always                                                      |
| In the past 2 weeks, I have felt Contented. | 1=Very rarely or never/ 2=Rarely/ 3=Sometimes/ 4=Often/ 5=Very often or always                                                      |
| <i>COVID-19 worry</i>                       | Please read the following statements carefully and then select the one which best describe how you have felt over the past 2 weeks. |
|                                             | I do not worry about getting COVID-19.                                                                                              |
|                                             | I occasionally worry about getting COVID-19.                                                                                        |
|                                             | I spend much of my time worrying about getting COVID-19.                                                                            |
|                                             | I spend most of my time worrying about getting COVID-19.                                                                            |

\*Gender and ethnicity were treated as binary variables in all analyses: gender (male, female), ethnicity (white British, non-white British).

† The factors in *Italic* were hypothesised to be associated with an increased risk of adverse mental health outcomes, apart from key-worker status where evidence exists that some key-worker roles are also associated with an increased risk of adverse COVID-19 outcomes. All other factors were hypothesised to be associated with an increased risk of contracting COVID-19 and/or poorer disease outcomes.

‡Positive mood was measured using the positive items from SPANE: Scale of Positive and Negative Experience ( $\alpha=0.94$ ).<sup>25</sup>

## Appendix 2: Results from univariable regressions

### Depression (PHQ-9)

Table S2: Univariable regression coefficients for non-modifiable factors as predictors of depression scores

| PHQ-9 Total Score (Square-Root Transformed) | Coefficient (Standard Error) |
|---------------------------------------------|------------------------------|------------------------------|------------------------------|------------------------------|------------------------------|------------------------------|
| Age (per decade)                            | -0.27****<br>(0.01)          |                              |                              |                              |                              |                              |
| Female                                      |                              | 0.37****<br>(0.06)           |                              |                              |                              |                              |
| Live alone                                  |                              |                              | 0.14*<br>(0.06)              |                              |                              |                              |
| BAME background                             |                              |                              |                              | 0.23**<br>(0.07)             |                              |                              |
| Key-worker                                  |                              |                              |                              |                              | 0.12**<br>(0.04)             |                              |
| Risk Group <sup>a</sup><br>Most at Risk     |                              |                              |                              |                              |                              | 0.46****<br>(0.11)           |
| Increased Risk                              |                              |                              |                              |                              |                              | 0.00<br>(0.02)               |
| Constant                                    | 3.68****<br>(0.06)           | 2.18****<br>(0.06)           | 2.47****<br>(0.02)           | 2.47****<br>(0.02)           | 2.43****<br>(0.03)           | 2.47****<br>(0.02)           |

\*\*\*\*  $p < 0.0001$ , \*\*\*  $p < 0.001$ , \*\*  $p < 0.01$ , \*  $p < 0.05$

<sup>a</sup> Comparison reference group "I am in neither risk category".

**Table S3: Univariable regression coefficients for modifiable factors as predictors of depression scores**

| PHQ-9 Total Score (Square-Root Transformed) | Coefficient (Standard Error) | Coefficient (Standard Error) | Coefficient (Standard Error) | Coefficient (Standard Error) |
|---------------------------------------------|------------------------------|------------------------------|------------------------------|------------------------------|
| Perceived loneliness                        | 0.25****<br>(0.01)           |                              |                              |                              |
| Positive mood                               |                              | -0.16****<br>(0.00)          |                              |                              |
| COVID-19 worry <sup>a</sup>                 |                              |                              |                              |                              |
| No worry                                    |                              |                              | 0.00<br>(0.06)               |                              |
| Much of time                                |                              |                              | 0.83****<br>(0.06)           |                              |
| Most of time                                |                              |                              | 1.33****<br>(0.11)           |                              |
| Perceived risk of COVID-19                  |                              |                              |                              | 0.08****<br>(0.01)           |
| Constant                                    | 1.55****<br>(0.03)           | 5.53****<br>(0.06)           | 2.33****<br>(0.03)           | 2.03****<br>(0.06)           |

\*\*\*\*  $p < 0.0001$ , \*\*\*  $p < 0.001$ , \*\*  $p < 0.01$ , \*  $p < 0.05$

<sup>a</sup> Comparison reference group "I occasionally worry about getting COVID-19"

**Table S4: Univariable logistic regression coefficients for non-modifiable factors as predictors of depression cases<sup>a</sup>**

| PHQ-9 "Cases"           | Odds Ratio [95% CI]      |
|-------------------------|--------------------------|--------------------------|--------------------------|--------------------------|--------------------------|--------------------------|
| Age (per decade)        | 0.68****<br>[0.65, 0.72] |                          |                          |                          |                          |                          |
| Female                  |                          | 1.43**<br>[1.14, 1.78]   |                          |                          |                          |                          |
| Live alone              |                          |                          | 1.15<br>[0.92, 1.43]     |                          |                          |                          |
| BAME background         |                          |                          |                          | 1.49**<br>[1.17, 1.91]   |                          |                          |
| Key-worker              |                          |                          |                          |                          | 1.16<br>[1.00, 1.35]     |                          |
| Risk Group <sup>b</sup> |                          |                          |                          |                          |                          |                          |
| Most at Risk            |                          |                          |                          |                          |                          | 1.59<br>[1.10, 2.31]     |
| Increased Risk          |                          |                          |                          |                          |                          | 1.14<br>[0.93, 1.39]     |
| Constant                | 2.37****<br>[1.86, 3.03] | 0.34****<br>[0.28, 0.42] | 0.45****<br>[0.42, 0.49] | 0.44****<br>[0.41, 0.48] | 0.43****<br>[0.38, 0.48] | 0.44****<br>[0.41, 0.48] |

\*\*\*\*  $p < 0.0001$ , \*\*\*  $p < 0.001$ , \*\*  $p < 0.01$ , \*  $p < 0.05$

<sup>a</sup> a "case" is defined as a PHQ-9 score greater than or equal to 10, at which level someone would qualify for high intensity psychological support in the NHS

<sup>b</sup> Comparison reference group "I am in neither risk category".



**Table S5: Univariable logistic regression coefficients for modifiable factors as predictors of depression cases<sup>a</sup>**

| PHQ-9 “Cases”               | Odds Ratio<br>[95% CI]   | Odds Ratio<br>[95% CI]        | Odds Ratio<br>[95% CI]    | Odds Ratio<br>[95% CI]   |
|-----------------------------|--------------------------|-------------------------------|---------------------------|--------------------------|
| Perceived loneliness        | 1.46****<br>[1.42, 1.51] |                               |                           |                          |
| Positive mood               |                          | 0.72****<br>[0.70, 0.74]      |                           |                          |
| COVID-19 worry <sup>b</sup> |                          |                               |                           |                          |
| No worry                    |                          |                               | 1.04<br>[0.84, 1.29]      |                          |
| Much of time                |                          |                               | 2.97****<br>[2.39, 3.69]  |                          |
| Most of time                |                          |                               | 8.27****<br>[5.44, 12.58] |                          |
| Perceived risk of COVID-19  |                          |                               |                           | 1.12****<br>[1.08, 1.16] |
| Constant                    | 0.09****<br>[0.08, 0.11] | 156.94****<br>[99.53, 247.47] | 0.35****<br>[0.32, 0.39]  | 0.24****<br>[0.20, 0.30] |

\*\*\*\*  $p < 0.0001$ , \*\*\*  $p < 0.001$ , \*\*  $p < 0.01$ , \*  $p < 0.05$

<sup>a</sup> a “case” is defined as a PHQ-9 score greater than or equal to 10, at which level someone would qualify for high intensity psychological support in the NHS

<sup>b</sup> Comparison reference group “I occasionally worry about getting COVID-19”

**Anxiety (GAD-7)****Table S6: Univariable regression coefficients for non-modifiable factors as predictors of anxiety scores**

| <b>GAD-7 Total Score (Square-Root Transformed)</b> | <b>Coefficient (Standard Error)</b> |
|----------------------------------------------------|-------------------------------------|-------------------------------------|-------------------------------------|-------------------------------------|-------------------------------------|-------------------------------------|
| Age (per decade)                                   | -0.24****<br>(0.01)                 |                                     |                                     |                                     |                                     |                                     |
| Female                                             |                                     | 0.45****<br>(0.06)                  |                                     |                                     |                                     |                                     |
| Live alone                                         |                                     |                                     | -0.21**<br>(0.07)                   |                                     |                                     |                                     |
| BAME background                                    |                                     |                                     |                                     | 0.17*<br>(0.08)                     |                                     |                                     |
| Key-worker                                         |                                     |                                     |                                     |                                     | 0.15***<br>(0.04)                   |                                     |
| Risk Group <sup>a</sup><br>Most at Risk            |                                     |                                     |                                     |                                     |                                     | 0.30**<br>(0.11)                    |
| Increased Risk                                     |                                     |                                     |                                     |                                     |                                     | -0.04<br>(0.06)                     |
| Constant                                           | 3.34****<br>(0.07)                  | 1.87****<br>(0.06)                  | 2.28****<br>(0.02)                  | 2.23****<br>(0.02)                  | 2.17****<br>(0.03)                  | 2.25****<br>(0.02)                  |

\*\*\*\*  $p < 0.0001$ , \*\*\*  $p < 0.001$ , \*\*  $p < 0.01$ , \*  $p < 0.05$

<sup>a</sup> Comparison reference group "I am in neither risk category".

**Table S7: Univariable regression coefficients for modifiable factors as predictors of anxiety scores**

| <b>GAD-7 Total Score (Square-Root Transformed)</b> | <b>Coefficient (Standard Error)</b> | <b>Coefficient (Standard Error)</b> | <b>Coefficient (Standard Error)</b> | <b>Coefficient (Standard Error)</b> |
|----------------------------------------------------|-------------------------------------|-------------------------------------|-------------------------------------|-------------------------------------|
| Perceived loneliness                               | 0.21****<br>(0.01)                  |                                     |                                     |                                     |
| Positive mood                                      |                                     | -0.16****<br>(0.00)                 |                                     |                                     |
| COVID-19 worry <sup>a</sup><br>No worry            |                                     |                                     | -0.22****<br>(0.06)                 |                                     |
| Much of time                                       |                                     |                                     | 1.06****<br>(0.06)                  |                                     |
| Most of time                                       |                                     |                                     | 1.75****<br>(0.11)                  |                                     |
| Perceived risk of COVID-19                         |                                     |                                     |                                     | 0.12****<br>(0.01)                  |
| Constant                                           | 1.45****<br>(0.03)                  | 5.20****<br>(0.07)                  | 2.08****<br>(0.02)                  | 1.62****<br>(0.06)                  |

\*\*\*\*  $p < 0.0001$ , \*\*\*  $p < 0.001$ , \*\*  $p < 0.01$ , \*  $p < 0.05$

<sup>a</sup> Comparison reference group "I occasionally worry about getting COVID-19"

**Table S8: Univariable logistic regression coefficients for non-modifiable factors as predictors of anxiety cases <sup>a</sup>**

| GAD-7 “Cases”           | Odds Ratio<br>[95% CI]   |
|-------------------------|--------------------------|--------------------------|--------------------------|--------------------------|--------------------------|--------------------------|
| Age (per decade)        | 0.70****<br>[0.66, 0.75] |                          |                          |                          |                          |                          |
| Female                  |                          | 1.56***<br>[1.22, 1.99]  |                          |                          |                          |                          |
| Live alone              |                          |                          | 0.80<br>[0.62, 1.02]     |                          |                          |                          |
| BAME background         |                          |                          |                          | 1.44**<br>[1.11, 1.86]   |                          |                          |
| Key-worker              |                          |                          |                          |                          | 1.16<br>[0.99, 1.36]     |                          |
| Risk Group <sup>b</sup> |                          |                          |                          |                          |                          |                          |
| Most at Risk            |                          |                          |                          |                          |                          | 1.47<br>[0.997, 2.16]    |
| Increased Risk          |                          |                          |                          |                          |                          | 0.96<br>[0.77, 1.19]     |
| Constant                | 1.58***<br>[1.23, 2.04]  | 0.24****<br>[0.19, 0.30] | 0.36****<br>[0.33, 0.39] | 0.34****<br>[0.31, 0.37] | 0.33****<br>[0.29, 0.37] | 0.35****<br>[0.32, 0.38] |

\*\*\*\*  $p < 0.0001$ , \*\*\*  $p < 0.001$ , \*\*  $p < 0.01$ , \*  $p < 0.05$

<sup>a</sup> a “case” is defined as a GAD-7 score greater than or equal to 10, at which level someone would qualify for high intensity psychological support in the NHS

<sup>b</sup> Comparison reference group “I am in neither risk category”.

**Table S9: Univariable logistic regression coefficients for modifiable factors as predictors of anxiety cases <sup>a</sup>**

| GAD-7 “Cases”               | Odds Ratio<br>[95% CI]   | Odds Ratio<br>[95% CI]       | Odds Ratio<br>[95% CI]      | Odds Ratio<br>[95% CI]   |
|-----------------------------|--------------------------|------------------------------|-----------------------------|--------------------------|
| Perceived loneliness        | 1.37****<br>[1.32, 1.41] |                              |                             |                          |
| Positive mood               |                          | 0.74****<br>[0.72, 0.76]     |                             |                          |
| COVID-19 worry <sup>b</sup> |                          |                              |                             |                          |
| No worry                    |                          |                              | 0.93<br>[0.72, 1.19]        |                          |
| Much of time                |                          |                              | 5.03****<br>[4.02, 6.28]    |                          |
| Most of time                |                          |                              | 24.75****<br>[14.83, 41.31] |                          |
| Perceived risk of COVID-19  |                          |                              |                             | 1.18****<br>[1.14, 1.23] |
| Constant                    | 0.09****<br>[0.08, 0.11] | 70.16****<br>[45.39, 108.44] | 0.23****<br>[0.21, 0.26]    | 0.14****<br>[0.11, 0.18] |

\*\*\*\*  $p < 0.0001$ , \*\*\*  $p < 0.001$ , \*\*  $p < 0.01$ , \*  $p < 0.05$

<sup>a</sup> a “case” is defined as a GAD-7 score greater than or equal to 10, at which level someone would qualify for high intensity psychological support in the NHS

<sup>b</sup> Comparison reference group “I occasionally worry about getting COVID-19”

**Stress (PSS-4)****Table S10: Univariable regression coefficients for non-modifiable factors as predictors of stress scores**

| PSS-4 Total Score                       | Coefficient<br>(Standard Error) |
|-----------------------------------------|---------------------------------|---------------------------------|---------------------------------|---------------------------------|---------------------------------|---------------------------------|
| Age (per decade)                        | -0.52****<br>(0.04)             |                                 |                                 |                                 |                                 |                                 |
| Female                                  |                                 | 0.71****<br>(0.16)              |                                 |                                 |                                 |                                 |
| Live alone                              |                                 |                                 | 0.13<br>(0.17)                  |                                 |                                 |                                 |
| BAME background                         |                                 |                                 |                                 | 0.84****<br>(0.20)              |                                 |                                 |
| Key-worker                              |                                 |                                 |                                 |                                 | -0.11<br>(0.12)                 |                                 |
| Risk Group <sup>a</sup><br>Most at Risk |                                 |                                 |                                 |                                 |                                 | 0.97****<br>(0.30)              |
| Increased Risk                          |                                 |                                 |                                 |                                 |                                 | -0.09<br>(0.16)                 |
| Constant                                | 8.84****<br>(0.18)              | 5.88****<br>(0.15)              | 6.46****<br>(0.06)              | 6.40****<br>(0.06)              | 6.53****<br>(0.08)              | 6.45****<br>(0.07)              |

\*\*\*\*  $p < 0.0001$ , \*\*\*  $p < 0.001$ , \*\*  $p < 0.01$ , \*  $p < 0.05$

<sup>a</sup> Comparison reference group "I am in neither risk category".

**Table S11: Univariable regression coefficients for modifiable factors as predictors of stress scores**

| PSS-4 Total Score                       | Coefficient<br>(Standard Error) | Coefficient<br>(Standard Error) | Coefficient<br>(Standard Error) | Coefficient<br>(Standard Error) |
|-----------------------------------------|---------------------------------|---------------------------------|---------------------------------|---------------------------------|
| Perceived loneliness                    | 0.62****<br>(0.02)              |                                 |                                 |                                 |
| Positive mood                           |                                 | -0.46****<br>(0.01)             |                                 |                                 |
| COVID-19 worry <sup>a</sup><br>No worry |                                 |                                 | -0.14<br>(0.15)                 |                                 |
| Much of time                            |                                 |                                 | 1.90****<br>(0.17)              |                                 |
| Most of time                            |                                 |                                 | 3.78****<br>(0.29)              |                                 |
| Perceived risk of COVID-19              |                                 |                                 |                                 | 0.22****<br>(0.03)              |
| Constant                                | 4.09****<br>(0.09)              | 15.28****<br>(0.16)             | 6.10****<br>(0.07)              | 5.31****<br>(0.15)              |

\*\*\*\*  $p < 0.0001$ , \*\*\*  $p < 0.001$ , \*\*  $p < 0.01$ , \*  $p < 0.05$

<sup>a</sup> Comparison reference group "I occasionally worry about getting COVID-19"

Appendix 3: Multivariable regression models, excluding perceived risk of COVID-19

Table S12: Regression model showing associations between modifiable explanatory variables and depression scores (excluding perceived risk of COVID-19)

|                                              | B     | 95% CI Lower | 95% CI Upper | $\beta$ | p          |
|----------------------------------------------|-------|--------------|--------------|---------|------------|
| <b>PHQ-9 Total Score<sup>a</sup></b>         |       |              |              |         |            |
| Age (per decade)                             | -0.18 | -0.20        | -0.16        | -0.22   | <.0001**** |
| Female                                       | 0.20  | 0.11         | 0.28         | 0.06    | <.0001**** |
| Live alone                                   | -0.00 | -0.10        | 0.09         | -0.00   | 0.92       |
| BAME background                              | -0.06 | -0.16        | 0.04         | -0.01   | 0.26       |
| Key-worker                                   | 0.07  | 0.01         | 0.12         | 0.03    | 0.03*      |
| Risk Group <sup>b</sup>                      |       |              |              |         |            |
| Most at Risk                                 | 0.20  | 0.05         | 0.35         | 0.03    | 0.01**     |
| Increased Risk                               | 0.15  | 0.07         | 0.23         | 0.05    | <.001***   |
| Perceived loneliness                         | 0.10  | 0.08         | 0.11         | 0.22    | <.0001**** |
| Positive mood                                | -0.12 | -0.13        | -0.11        | -0.50   | <.0001**** |
| COVID-19 worry <sup>c</sup>                  |       |              |              |         |            |
| No worry                                     | 0.03  | -0.05        | 0.11         | 0.01    | 0.45       |
| Much of time                                 | 0.26  | 0.18         | 0.35         | 0.07    | <.0001**** |
| Most of time                                 | 0.34  | 0.19         | 0.50         | 0.05    | <.0001**** |
| <b>Adj R<sup>2</sup>=.56, p&lt;.0001****</b> |       |              |              |         |            |

\*\*\*\* p<0.0001, \*\*\* p<0.001, \*\* p<0.01, \* p<0.05

<sup>a</sup> A square-root transformation was applied to the dependent variable

<sup>b</sup> Comparison reference group “I am in neither risk category”.

<sup>c</sup> Comparison reference group “I occasionally worry about getting COVID-19”

Table S13: Logistic regression model showing associations between modifiable explanatory variables and depression cases (excluding perceived risk of COVID-19)

|                                          | Odds Ratio | 95% CI Lower | 95% CI Upper | $\beta$ | p          |
|------------------------------------------|------------|--------------|--------------|---------|------------|
| <b>PHQ-9 “Cases”<sup>a</sup></b>         |            |              |              |         |            |
| Age (per decade)                         | 0.68       | 0.63         | 0.73         | -1.24   | <.0001**** |
| Female                                   | 1.20       | 0.90         | 1.60         | 0.14    | 0.21       |
| Live alone                               | 0.84       | 0.61         | 1.15         | -0.13   | 0.28       |
| BAME background                          | 0.98       | 0.70         | 1.37         | -0.01   | 0.90       |
| Key-worker                               | 1.22       | 1.00         | 1.48         | 0.21    | 0.05       |
| Risk Group <sup>b</sup>                  |            |              |              |         |            |
| Most at Risk                             | 1.18       | 0.72         | 1.94         | 0.07    | 0.51       |
| Increased Risk                           | 1.44       | 1.10         | 1.89         | 0.30    | 0.007**    |
| Perceived loneliness                     | 1.21       | 1.16         | 1.26         | 1.12    | <.0001**** |
| Positive mood                            | 0.76       | 0.74         | 0.78         | -2.96   | <.0001**** |
| COVID-19 worry <sup>c</sup>              |            |              |              |         |            |
| No worry                                 | 0.93       | 0.70         | 1.24         | -0.06   | 0.63       |
| Much of time                             | 1.58       | 1.21         | 2.07         | 0.34    | <.001***   |
| Most of time                             | 2.65       | 1.58         | 4.43         | 0.40    | <.001***   |
| <b>Pseudo R<sup>2</sup>=0.34, n=3090</b> |            |              |              |         |            |

\*\*\*\* p<0.0001, \*\*\* p<0.001, \*\* p<0.01, \* p<0.05

<sup>a</sup> a “case” is defined as a PHQ-9 score greater than or equal to 10, at which level someone would qualify for high intensity psychological support in the NHS

<sup>b</sup> Comparison reference group “I am in neither risk category”.

<sup>c</sup> Comparison reference group “I occasionally worry about getting COVID-19”

**Table S14: Regression model showing associations between modifiable explanatory variables and anxiety scores (excluding perceived risk of COVID-19)**

|                                      | B     | 95% CI Lower | 95% CI Upper | $\beta$ | <i>p</i>   |
|--------------------------------------|-------|--------------|--------------|---------|------------|
| <b>GAD-7 Total Score<sup>a</sup></b> |       |              |              |         |            |
| Age (per decade)                     | -0.16 | -0.19        | -0.14        | -0.20   | <.0001**** |
| Female                               | 0.25  | 0.16         | 0.33         | 0.07    | <.0001**** |
| Live alone                           | -0.27 | -0.36        | -0.17        | -0.07   | <.0001**** |
| BAME background                      | -0.08 | -0.18        | 0.03         | -0.02   | 0.14       |
| Key-worker                           | 0.04  | -0.02        | 0.10         | 0.02    | 0.17       |
| Risk Group <sup>b</sup>              |       |              |              |         |            |
| Most at Risk                         | 0.01  | -0.15        | 0.17         | 0.00    | 0.92       |
| Increased Risk                       | 0.06  | -0.02        | 0.15         | 0.02    | 0.13       |
| Perceived loneliness                 | 0.06  | 0.05         | 0.07         | 0.13    | <.0001**** |
| Positive mood                        | -0.12 | -0.12        | -0.11        | -0.48   | <.0001**** |
| COVID-19 worry <sup>c</sup>          |       |              |              |         |            |
| No worry                             | -0.19 | -0.27        | -0.11        | -0.06   | <.0001**** |
| Much of time                         | 0.57  | 0.48         | 0.66         | 0.16    | <.0001**** |
| Most of time                         | 0.87  | 0.71         | 1.03         | 0.14    | <.0001**** |
| <b>Adj R<sup>2</sup>=.53, n=3090</b> |       |              |              |         |            |

\*\*\*\*  $p < 0.0001$ , \*\*\*  $p < 0.001$ , \*\*  $p < 0.01$ , \*  $p < 0.05$

<sup>a</sup> A square-root transformation was applied to the dependent variable

<sup>b</sup> Comparison reference group "I am in neither risk category".

<sup>c</sup> Comparison reference group "I occasionally worry about getting COVID-19"

**Table S15: Logistic regression model showing associations between modifiable explanatory variables and anxiety cases (excluding perceived risk of COVID-19)**

|                                          | Odds Ratio | 95% CI Lower | 95% CI Upper | $\beta$ | <i>p</i>   |
|------------------------------------------|------------|--------------|--------------|---------|------------|
| <b>GAD-7 "Cases"<sup>a</sup></b>         |            |              |              |         |            |
| Age (per decade)                         | 0.69       | 0.64         | 0.75         | -1.25   | <.0001**** |
| Female                                   | 1.23       | 0.91         | 1.67         | 0.17    | 0.18       |
| Live alone                               | 0.56       | 0.40         | 0.79         | -0.44   | <.001***   |
| BAME background                          | 0.91       | 0.65         | 1.29         | -0.06   | 0.61       |
| Key-worker                               | 1.11       | 0.90         | 1.36         | 0.11    | 0.34       |
| Risk Group <sup>b</sup>                  |            |              |              |         |            |
| Most at Risk                             | 0.88       | 0.53         | 1.47         | -0.05   | 0.63       |
| Increased Risk                           | 0.93       | 0.70         | 1.25         | -0.06   | 0.65       |
| Perceived loneliness                     | 1.13       | 1.08         | 1.18         | 0.76    | <.0001**** |
| Positive mood                            | 0.78       | 0.75         | 0.80         | -2.91   | <.0001**** |
| COVID-19 worry <sup>c</sup>              |            |              |              |         |            |
| No worry                                 | 0.72       | 0.53         | 0.98         | -0.28   | 0.04*      |
| Much of time                             | 3.59       | 2.76         | 4.68         | 0.99    | <.0001**** |
| Most of time                             | 12.54      | 6.97         | 22.56        | 1.11    | <.0001**** |
| <b>Pseudo R<sup>2</sup>=0.34, n=3090</b> |            |              |              |         |            |

\*\*\*\*  $p < 0.0001$ , \*\*\*  $p < 0.001$ , \*\*  $p < 0.01$ , \*  $p < 0.05$

<sup>a</sup> a "case" is defined as a GAD-7 score greater than or equal to 10, at which level someone would qualify for high intensity psychological support in the NHS

<sup>b</sup> Comparison reference group "I am in neither risk category".

<sup>c</sup> Comparison reference group "I occasionally worry about getting COVID-19"

**Table S16: Regression model showing associations between modifiable explanatory variables and stress scores (excluding perceived risk of COVID-19)**

|                                      | <b>B</b> | <b>95% CI Lower</b> | <b>95% CI Upper</b> | <b><math>\beta</math></b> | <b><i>p</i></b> |
|--------------------------------------|----------|---------------------|---------------------|---------------------------|-----------------|
| <b>PSS-4 Total Score</b>             |          |                     |                     |                           |                 |
| Age (per decade)                     | -0.25    | -0.30               | -0.19               | -0.11                     | <.0001****      |
| Female                               | 0.31     | 0.09                | 0.52                | 0.03                      | 0.005**         |
| Live alone                           | -0.37    | -0.61               | -0.13               | -0.04                     | 0.003**         |
| BAME background                      | 0.21     | -0.06               | 0.47                | 0.02                      | 0.13            |
| Key-worker                           | -0.24    | -0.40               | -0.09               | -0.04                     | 0.002**         |
| Risk Group <sup>a</sup>              |          |                     |                     |                           |                 |
| Most at Risk                         | 0.14     | -0.27               | 0.54                | 0.01                      | 0.50            |
| Increased Risk                       | 0.08     | -0.13               | 0.30                | 0.01                      | 0.43            |
| Perceived loneliness                 | 0.20     | 0.17                | 0.24                | 0.17                      | <.0001****      |
| Positive mood                        | -0.38    | -0.40               | -0.36               | -0.59                     | <.0001****      |
| COVID-19 worry <sup>b</sup>          |          |                     |                     |                           |                 |
| No worry                             | 0.01     | -0.21               | 0.22                | 0.00                      | 0.94            |
| Much of time                         | 0.36     | 0.12                | 0.59                | 0.04                      | 0.003**         |
| Most of time                         | 0.99     | 0.57                | 1.40                | 0.06                      | <.0001****      |
| <b>Adj R<sup>2</sup>=.56, n=3090</b> |          |                     |                     |                           |                 |

\*\*\*\*  $p < 0.0001$ , \*\*\*  $p < 0.001$ , \*\*  $p < 0.01$ , \*  $p < 0.05$

<sup>a</sup> Comparison reference group "I am in neither risk category".

<sup>b</sup> Comparison reference group "I occasionally worry about getting COVID-19"

**Appendix 4: Means for depression, anxiety and stress with overall means weighted to mid-2019 UK population distribution**

**Table S17: Means for depression, anxiety and stress scores with overall means weighted to UK mid-2019 population distribution**

|                                               | Number      | Depression (PHQ-9) score | Anxiety (GAD-7) score | Stress (PSS-4) score |
|-----------------------------------------------|-------------|--------------------------|-----------------------|----------------------|
|                                               |             | Participants             | Participants          | Participants         |
|                                               |             | Mean                     | Mean                  | Mean                 |
| <b>Males</b>                                  |             |                          |                       |                      |
| <b>Age group</b>                              |             |                          |                       |                      |
| 18-19                                         | 9           | 8.11                     | 4.67                  | 5.11                 |
| 20-24                                         | 68          | 9.88                     | 7.49                  | 7.06                 |
| 25-29                                         | 42          | 8.12                     | 6.24                  | 6.55                 |
| 30-34                                         | 34          | 7.94                     | 6.82                  | 6.53                 |
| 35-39                                         | 42          | 6.40                     | 5.88                  | 5.74                 |
| 40-44                                         | 51          | 7.04                     | 5.59                  | 5.90                 |
| 45-49                                         | 37          | 7.14                     | 6.30                  | 6.46                 |
| 50-54                                         | 43          | 6.51                     | 4.56                  | 6.07                 |
| 55-59                                         | 42          | 5.64                     | 5.17                  | 6.00                 |
| 60-64                                         | 29          | 5.07                     | 4.03                  | 5.21                 |
| 65-69                                         | 40          | 2.03                     | 1.83                  | 4.05                 |
| 70-74                                         | 24          | 2.46                     | 2.08                  | 4.63                 |
| 75-79                                         | 7           | 1.71                     | 1.57                  | 3.71                 |
| 80+                                           | 8           | 3.25                     | 1.90                  | 3.55                 |
| <b>Overall<sup>1</sup></b>                    | <b>476</b>  | <b>6.08</b>              | <b>4.91</b>           | <b>5.68</b>          |
| <b>Females</b>                                |             |                          |                       |                      |
| <b>Age group</b>                              |             |                          |                       |                      |
| 18-19                                         | 35          | 9.29                     | 8.37                  | 7.57                 |
| 20-24                                         | 252         | 11.99                    | 9.68                  | 8.60                 |
| 25-29                                         | 215         | 9.13                     | 7.84                  | 7.01                 |
| 30-34                                         | 237         | 8.62                     | 8.03                  | 7.00                 |
| 35-39                                         | 266         | 9.05                     | 8.12                  | 7.20                 |
| 40-44                                         | 277         | 7.95                     | 6.94                  | 6.47                 |
| 45-49                                         | 299         | 7.91                     | 6.58                  | 6.38                 |
| 50-54                                         | 311         | 6.90                     | 6.23                  | 5.92                 |
| 55-59                                         | 298         | 6.80                     | 5.98                  | 6.20                 |
| 60-64                                         | 201         | 6.01                     | 4.88                  | 5.63                 |
| 65-69                                         | 127         | 4.68                     | 3.98                  | 5.59                 |
| 70-74                                         | 66          | 3.77                     | 3.41                  | 4.83                 |
| 75-79                                         | 24          | 4.75                     | 3.42                  | 5.42                 |
| 80+                                           | 9           | 4.00                     | 2.07                  | 6.15                 |
| <b>Overall<sup>1</sup></b>                    | <b>2617</b> | <b>7.32</b>              | <b>6.18</b>           | <b>6.36</b>          |
| <b>Overall: Males and females<sup>1</sup></b> |             | <b>6.71</b>              | <b>5.56</b>           | <b>6.03</b>          |

<sup>1</sup> Overall means weighted to mid-year population distribution of UK for 2019



## STROBE (Strengthening The Reporting of OBServational Studies in Epidemiology) Checklist

A checklist of items that should be included in reports of observational studies. You must report the page number in your manuscript where you consider each of the items listed in this checklist. If you have not included this information, either revise your manuscript accordingly before submitting or note N/A.

**Note:** An Explanation and Elaboration article discusses each checklist item and gives methodological background and published examples of transparent reporting. The STROBE checklist is best used in conjunction with this article (freely available on the Web sites of PLoS Medicine at <http://www.plosmedicine.org/>, Annals of Internal Medicine at <http://www.annals.org/>, and Epidemiology at <http://www.epidem.com/>). Information on the STROBE Initiative is available at [www.strobe-statement.org](http://www.strobe-statement.org).

| Section and Item     | Item No. | Recommendation                                                                                                                                                                                                                                                                                                                                                                                                                                                                 | Reported on Page No. |
|----------------------|----------|--------------------------------------------------------------------------------------------------------------------------------------------------------------------------------------------------------------------------------------------------------------------------------------------------------------------------------------------------------------------------------------------------------------------------------------------------------------------------------|----------------------|
| Title and Abstract   | 1        | (a) Indicate the study's design with a commonly used term in the title or the abstract                                                                                                                                                                                                                                                                                                                                                                                         |                      |
|                      |          | (b) Provide in the abstract an informative and balanced summary of what was done and what was found                                                                                                                                                                                                                                                                                                                                                                            |                      |
| <b>Introduction</b>  |          |                                                                                                                                                                                                                                                                                                                                                                                                                                                                                |                      |
| Background/Rationale | 2        | Explain the scientific background and rationale for the investigation being reported                                                                                                                                                                                                                                                                                                                                                                                           |                      |
| Objectives           | 3        | State specific objectives, including any prespecified hypotheses                                                                                                                                                                                                                                                                                                                                                                                                               |                      |
| <b>Methods</b>       |          |                                                                                                                                                                                                                                                                                                                                                                                                                                                                                |                      |
| Study Design         | 4        | Present key elements of study design early in the paper                                                                                                                                                                                                                                                                                                                                                                                                                        |                      |
| Setting              | 5        | Describe the setting, locations, and relevant dates, including periods of recruitment, exposure, follow-up, and data collection                                                                                                                                                                                                                                                                                                                                                |                      |
| Participants         | 6        | (a) <i>Cohort study</i> —Give the eligibility criteria, and the sources and methods of selection of participants. Describe methods of follow-up<br><br><i>Case-control study</i> —Give the eligibility criteria, and the sources and methods of case ascertainment and control selection. Give the rationale for the choice of cases and controls<br><br><i>Cross-sectional study</i> —Give the eligibility criteria, and the sources and methods of selection of participants |                      |
|                      |          | (b) <i>Cohort study</i> —For matched studies, give matching criteria and number of exposed and unexposed<br><br><i>Case-control study</i> —For matched studies, give matching criteria and the number of controls per case                                                                                                                                                                                                                                                     |                      |
| Variables            | 7        | Clearly define all outcomes, exposures, predictors, potential confounders, and effect modifiers. Give diagnostic criteria, if applicable                                                                                                                                                                                                                                                                                                                                       |                      |

| Section and Item             | Item No. | Recommendation                                                                                                                                                                                                                                                                                            | Reported on Page No. |
|------------------------------|----------|-----------------------------------------------------------------------------------------------------------------------------------------------------------------------------------------------------------------------------------------------------------------------------------------------------------|----------------------|
| Data Sources/<br>Measurement | 8*       | For each variable of interest, give sources of data and details of methods of assessment (measurement). Describe comparability of assessment methods if there is more than one group                                                                                                                      |                      |
| Bias                         | 9        | Describe any efforts to address potential sources of bias                                                                                                                                                                                                                                                 |                      |
| Study Size                   | 10       | Explain how the study size was arrived at                                                                                                                                                                                                                                                                 |                      |
| Quantitative Variables       | 11       | Explain how quantitative variables were handled in the analyses. If applicable, describe which groupings were chosen and why                                                                                                                                                                              |                      |
| Statistical Methods          | 12       | (a) Describe all statistical methods, including those used to control for confounding                                                                                                                                                                                                                     |                      |
|                              |          | (b) Describe any methods used to examine subgroups and interactions                                                                                                                                                                                                                                       |                      |
|                              |          | (c) Explain how missing data were addressed                                                                                                                                                                                                                                                               |                      |
|                              |          | (d) <i>Cohort study</i> —If applicable, explain how loss to follow-up was addressed<br><i>Case-control study</i> —If applicable, explain how matching of cases and controls was addressed<br><i>Cross-sectional study</i> —If applicable, describe analytical methods taking account of sampling strategy |                      |
|                              |          | (e) Describe any sensitivity analyses                                                                                                                                                                                                                                                                     |                      |
| <b>Results</b>               |          |                                                                                                                                                                                                                                                                                                           |                      |
| Participants                 | 13*      | (a) Report numbers of individuals at each stage of study—eg numbers potentially eligible, examined for eligibility, confirmed eligible, included in the study, completing follow-up, and analysed                                                                                                         |                      |
|                              |          | (b) Give reasons for non-participation at each stage                                                                                                                                                                                                                                                      |                      |
|                              |          | (c) Consider use of a flow diagram                                                                                                                                                                                                                                                                        |                      |
| Descriptive Data             | 14*      | (a) Give characteristics of study participants (eg demographic, clinical, social) and information on exposures and potential confounders                                                                                                                                                                  |                      |
|                              |          | (b) Indicate number of participants with missing data for each variable of interest                                                                                                                                                                                                                       |                      |
|                              |          | (c) <i>Cohort study</i> —Summarise follow-up time (eg, average and total amount)                                                                                                                                                                                                                          |                      |
| Outcome Data                 | 15*      | <i>Cohort study</i> —Report numbers of outcome events or summary measures over time                                                                                                                                                                                                                       |                      |
|                              |          | <i>Case-control study</i> —Report numbers in each exposure category, or summary measures of exposure                                                                                                                                                                                                      |                      |
|                              |          | <i>Cross-sectional study</i> —Report numbers of outcome events or summary measures                                                                                                                                                                                                                        |                      |

| Section and Item         | Item No. | Recommendation                                                                                                                                                                                               | Reported on Page No. |
|--------------------------|----------|--------------------------------------------------------------------------------------------------------------------------------------------------------------------------------------------------------------|----------------------|
| Main Results             | 16       | (a) Give unadjusted estimates and, if applicable, confounder-adjusted estimates and their precision (eg, 95% confidence interval). Make clear which confounders were adjusted for and why they were included |                      |
|                          |          | (b) Report category boundaries when continuous variables were categorized                                                                                                                                    |                      |
|                          |          | (c) If relevant, consider translating estimates of relative risk into absolute risk for a meaningful time period                                                                                             |                      |
| Other Analyses           | 17       | Report other analyses done—eg analyses of subgroups and interactions, and sensitivity analyses                                                                                                               |                      |
| <b>Discussion</b>        |          |                                                                                                                                                                                                              |                      |
| Key Results              | 18       | Summarise key results with reference to study objectives                                                                                                                                                     |                      |
| Limitations              | 19       | Discuss limitations of the study, taking into account sources of potential bias or imprecision. Discuss both direction and magnitude of any potential bias                                                   |                      |
| Interpretation           | 20       | Give a cautious overall interpretation of results considering objectives, limitations, multiplicity of analyses, results from similar studies, and other relevant evidence                                   |                      |
| Generalisability         | 21       | Discuss the generalisability (external validity) of the study results                                                                                                                                        |                      |
| <b>Other Information</b> |          |                                                                                                                                                                                                              |                      |
| Funding                  | 22       | Give the source of funding and the role of the funders for the present study and, if applicable, for the original study on which the present article is based                                                |                      |

\*Give information separately for cases and controls in case-control studies and, if applicable, for exposed and unexposed groups in cohort and cross-sectional studies.

**Once you have completed this checklist, please save a copy and upload it as part of your submission. DO NOT include this checklist as part of the main manuscript document. It must be uploaded as a separate file.**

# BMJ Open

## Mental health in the UK during the COVID-19 pandemic: Cross-sectional analyses from a community cohort study

|                                 |                                                                                                                                                                                                                                                                                                                                                                                                                                                                                                          |
|---------------------------------|----------------------------------------------------------------------------------------------------------------------------------------------------------------------------------------------------------------------------------------------------------------------------------------------------------------------------------------------------------------------------------------------------------------------------------------------------------------------------------------------------------|
| Journal:                        | <i>BMJ Open</i>                                                                                                                                                                                                                                                                                                                                                                                                                                                                                          |
| Manuscript ID                   | bmjopen-2020-040620.R2                                                                                                                                                                                                                                                                                                                                                                                                                                                                                   |
| Article Type:                   | Original research                                                                                                                                                                                                                                                                                                                                                                                                                                                                                        |
| Date Submitted by the Author:   | 20-Aug-2020                                                                                                                                                                                                                                                                                                                                                                                                                                                                                              |
| Complete List of Authors:       | Jia, Ru; University of Nottingham Division of Primary Care<br>Ayling, Kieran; University of Nottingham Division of Primary Care<br>Chalder, Trudie; King's College London, PSYCHOLOGICAL MEDICINE<br>Massey, Adam; University of Nottingham Division of Primary Care<br>Broadbent, E; The University of Auckland Faculty of Medical and Health<br>Sciences<br>Coupland, Carol; University of Nottingham, Division of Primary Care<br>Vedhara, Kavita; University of Nottingham, Division of Primary Care |
| <b>Primary Subject Heading</b>: | Mental health                                                                                                                                                                                                                                                                                                                                                                                                                                                                                            |
| Secondary Subject Heading:      | Epidemiology, Health services research, Public health                                                                                                                                                                                                                                                                                                                                                                                                                                                    |
| Keywords:                       | MENTAL HEALTH, PSYCHIATRY, PUBLIC HEALTH                                                                                                                                                                                                                                                                                                                                                                                                                                                                 |
|                                 |                                                                                                                                                                                                                                                                                                                                                                                                                                                                                                          |

SCHOLARONE™  
Manuscripts



I, the Submitting Author has the right to grant and does grant on behalf of all authors of the Work (as defined in the below author licence), an exclusive licence and/or a non-exclusive licence for contributions from authors who are: i) UK Crown employees; ii) where BMJ has agreed a CC-BY licence shall apply, and/or iii) in accordance with the terms applicable for US Federal Government officers or employees acting as part of their official duties; on a worldwide, perpetual, irrevocable, royalty-free basis to BMJ Publishing Group Ltd ("BMJ") its licensees and where the relevant Journal is co-owned by BMJ to the co-owners of the Journal, to publish the Work in this journal and any other BMJ products and to exploit all rights, as set out in our [licence](#).

The Submitting Author accepts and understands that any supply made under these terms is made by BMJ to the Submitting Author unless you are acting as an employee on behalf of your employer or a postgraduate student of an affiliated institution which is paying any applicable article publishing charge ("APC") for Open Access articles. Where the Submitting Author wishes to make the Work available on an Open Access basis (and intends to pay the relevant APC), the terms of reuse of such Open Access shall be governed by a Creative Commons licence – details of these licences and which [Creative Commons](#) licence will apply to this Work are set out in our licence referred to above.

Other than as permitted in any relevant BMJ Author's Self Archiving Policies, I confirm this Work has not been accepted for publication elsewhere, is not being considered for publication elsewhere and does not duplicate material already published. I confirm all authors consent to publication of this Work and authorise the granting of this licence.

1  
2  
3 **Mental health in the UK during the COVID-19 pandemic: Cross-sectional analyses from a community**  
4 **cohort study**  
5  
6  
7

8 **Brief title: Mental Health in the UK & COVID-19: A cohort study**  
9

10  
11 <sup>1</sup>Ru Jia MSc [Research Assistant],

12  
13 <sup>1</sup>Kieran Ayling PhD [Senior Research Fellow],

14  
15 <sup>2</sup>Trudie Chalder PhD [Professor of Cognitive Behavioural Psychotherapy],

16  
17 <sup>1</sup>Adam Massey PhD [Honorary Research Associate],

18  
19 <sup>3</sup>Elizabeth Broadbent PhD [Professor in Health Psychology],

20  
21 <sup>1</sup>Carol Coupland PhD [Professor of Medical Statistics in Primary Care],

22  
23 <sup>1\*</sup>Kavita Vedhara PhD [Professor of Health Psychology]

24  
25 <sup>1</sup>Division of Primary Care

26  
27 University of Nottingham

28  
29 University Park

30  
31 Nottingham, NG7 2RD

32  
33 <sup>2</sup>Department of Psychological Medicine,

34  
35 Institute of Psychiatry, Psychology & Neuroscience,

36  
37 King's College London,

38  
39 16, De Crespigny Park,

40  
41 London, SE5 8AF,

42  
43 United Kingdom.

44  
45 <sup>3</sup>Department of Psychological Medicine,

46  
47 University of Auckland,

48  
49 Private bag 92019, Auckland,

50  
51 New Zealand.

52  
53  
54  
55 \* Author to whom all correspondence should be addressed: Professor Kavita Vedhara, Division of Primary  
56 Care, University of Nottingham, University Park, Nottingham, NG7 2RD, UK.

57 [Kavita.vedhara@nottingham.ac.uk](mailto:Kavita.vedhara@nottingham.ac.uk); Tel +44 115 8466931  
58  
59  
60

## Abstract

**Objectives:** Previous pandemics have resulted in significant consequences for mental health. Here we report the mental health sequelae of the COVID-19 pandemic in a UK cohort and examine modifiable and non-modifiable explanatory factors associated with mental health outcomes. We focus on the first wave of data collection which examined short-term consequences for mental health, as reported during the first four-six weeks of social distancing measures being introduced.

**Design:** Cross sectional online survey

**Setting:** Community cohort study

**Participants:** N=3097 adults aged  $\geq 18$  years were recruited through a mainstream and social media campaign between 3/4/20-30/4/20. The cohort was predominantly female (n=2618); mean age forty-four years; 10% (n=296) from minority ethnic groups; 50% (n=1559) described themselves as key-workers and 20% (n=649) identified as having clinical risk factors putting them at increased risk of COVID-19

**Main outcome measures:** depression, anxiety and stress scores.

**Results:** Mean scores for depression ( $\bar{x}=7.69$ ,  $sd=6.0$ ), stress ( $\bar{x}=6.48$ ,  $sd=3.3$ ), and anxiety ( $\bar{x}=6.48$ ,  $sd=3.3$ ) significantly exceeded population norms (all  $p<0.0001$ ). Analysis of non-modifiable factors hypothesised to be associated with mental health outcomes indicated that being younger, female and in a recognised COVID-19 risk group were associated with increased stress, anxiety and depression, with the final multivariable models accounting for 7-14% of variance. When adding modifiable factors, significant independent effects emerged for positive mood, perceived loneliness and worry about getting COVID-19 for all outcomes, with the final multivariable models accounting for 54-57% of total variance.

**Conclusions:** Increased psychological morbidity was evident in this UK sample and found to be more common in younger people, women and in individuals who identified as being in recognised COVID-19 risk groups. Public health and mental health interventions able to ameliorate perceptions of risk of COVID-19, worry about COVID-19 loneliness, and boost positive mood may be effective.

### Article Summary

- To our knowledge, this paper provides the first empirical evidence from a large cohort on the mental health impact of the COVID-19 pandemic on people in the UK
- The findings are based on a large community cohort of N=3097 adults aged 18 years or older, capturing the views of people across the UK, including key-workers and individuals from ethnic minority groups.
- The use of validated measures of mental health allows us to conclude that levels of depression, anxiety and stress significantly exceed previously reported population norms.
- The assessment of demographic and modifiable psychological variables allows us to report on which groups appear to be at greatest risk of increased psychological morbidity, and identifies a role for psychological and public health interventions.
- The cross-sectional design prohibits an analysis of causal relationships and the recruitment of a self-selected community sample has implications for generalisability.



## Introduction

The COVID-19 (Coronavirus, 2019) pandemic has resulted in unprecedented disruption to the fabric of society, our health service and economy. However, the multitude of challenges presented by the pandemic may also pose a significant threat to our psychological health. <sup>1</sup> Individuals are facing a panoply of stressors including serious illness, bereavement, social distancing, and unemployment. The consequences of these stressors for mental health will not be uniform, rather they will be influenced by a range of modifiable and non-modifiable factors. Identification of the latter will be critical in determining who may be at greatest risk of mental health difficulties and should be the focus of future interventions; while the former can inform approaches to intervention. We report here cross-sectional findings from a community cohort study designed to capture both the mental health sequelae of the COVID-19 pandemic, as well as the modifiable and non-modifiable explanatory factors associated with adverse mental health outcomes. Our focus is on the immediate consequences for mental health, as reported during the first 4-6 weeks of social distancing measures being introduced in the UK.

In keeping with its recent emergence, much remains unknown about COVID-19 and its consequences. However, the expectation is that the consequences for both mental and physical health will be profound and far reaching. <sup>2</sup> With regard to the former, evidence from China attests to this possibility. <sup>3,4</sup>, as does the experience of previous pandemics. <sup>5,6</sup> Indeed, preliminary evidence from the UK suggests that these experiences may be replicated here.<sup>7</sup> } But who might be at greatest risk of mental health difficulties? Individuals at increased risk of the disease and/or adverse outcomes might be expected to experience greater psychological morbidity. For example, the death rate is known to be higher in men and older individuals.<sup>8,9</sup> The latter being also more likely to have co-existing conditions and be socially-isolated through shielding. The ethnic diversity of countries such as the US and UK has also highlighted that individuals from Black, Asian and Minority Ethnic (BAME) backgrounds appear to be affected disproportionately by the disease.<sup>10</sup> Recent UK data also suggest that key-workers, in particular those in social care, are at greater risk of COVID-19 related mortality. <sup>8</sup>

The aforementioned factors are, however, largely non-modifiable and thus are valuable in understanding who may be at greatest risk of mental health difficulties and in need of intervention. Do modifiable risk factors exist which could be targets for intervention? Stress and coping theory.<sup>11</sup> attests that emotional responses to challenging situations vary according to both our appraisal of stressors and the availability of psychological and social resources. Cognitions are central to the former and evidence from previous pandemics and the COVID-19 pandemic suggest that perceptions of the risk of contracting the disease and increased worry about risks to health are positively associated with adverse mental health outcomes.<sup>12-14</sup> In terms of resources, social support,

1  
2  
3 and its corollary loneliness, are among the best established determinants of our emotional responses to stressors.  
4  
5 Successive systematic reviews demonstrate poorer mental health outcomes and increased morbidity and  
6  
7 mortality in individuals who perceive themselves to be more lonely and lacking in support.<sup>15,16</sup> Positive mood,  
8  
9 now no longer viewed as just the opposite of negative mood, may also confer direct effects on well-being as  
10  
11 well as protective effects in challenging situations.<sup>11,17-19</sup> In terms of mental health, evidence suggests that the  
12  
13 existence of positive mood reduces the risk of mood disorders by 28% and anxiety disorders by 53%, and also  
14  
15 influences recovery from some mental health conditions.<sup>20,21</sup>  
16  
17 Taken together there is an urgent need to report evidence on the prevalence of mental health problems during  
18  
19 the COVID-19 pandemic, to understand who may be at greatest risk, and to explore the psychological and social  
20  
21 resources that may mitigate this risk. To that end, we report cross sectional findings from a community cohort  
22  
23 established in April 2020 to prospectively examine the mental health consequences of the pandemic. We focus  
24  
25 here on findings from the first survey conducted between 3<sup>rd</sup> and 30<sup>th</sup> April 2020 which coincided with the first  
26  
27 4-6 weeks of social distancing measures being introduced in the UK.  
28  
29

## 30 **Methods**

### 31 **Ethics, Recruitment and Eligibility**

32  
33 Ethical approval was granted from the University of Nottingham Faculty of Medicine and Health Sciences (ref:  
34  
35 506-2003) and the NHS Health Research Authority (ref: 20/HRA/1858). The study was launched on 3/4/20 with  
36  
37 participants recruited in the community through a social and mainstream media campaign involving, but not  
38  
39 limited to, Facebook and Twitter. In addition, HRA regulatory approval enabled us to approach NHS  
40  
41 organisations and request they advertise the research through their routine communications. Recruitment  
42  
43 continued until 30/4/20. All media directed potential participants to the study website  
44  
45 ([www.covidstresstudy.co.uk](http://www.covidstresstudy.co.uk)) through which they accessed the information sheet, consent form and online  
46  
47 survey.  
48

49 Eligibility criteria specified that participants should be: aged 18 and over; able to give informed consent; able to  
50  
51 read English; residing in the UK at the time of completing the survey and able to provide a sample of hair at  
52  
53 least 1 cm long. The latter was collected for the determination of the stress biomarker cortisol which will be the  
54  
55 subject of future manuscripts.  
56

### 57 **Patient and public involvement (PPI)**

1  
2  
3 We convened a virtual PPI group to support this research the aims of which were to advise on the development  
4 of the survey, the participant information sheet and optimising recruitment and retention. Individuals  
5 participated via MS Teams in one-to-one or group discussions. These discussions informed the length and  
6 structure of the survey, language of the information sheet and strategies for recruiting via media and social  
7 media. The views of this group were instrumental in achieving our large sample size. This group also advised on  
8 providing regular feedback to participants on study findings through the study website and between each wave  
9 of data collection.  
10  
11  
12  
13  
14  
15

### 16 **Sample size**

17  
18 We did not place an upper limit on participant numbers to enable us to obtain precise estimates of population  
19 values and associations, and to be able to examine these in subgroups. As a minimum we estimated that 252  
20 participants would be required to detect an  $R^2$  value of 0.1, with 90% power and a 5% significance level based  
21 on inclusion of 20 explanatory variables in a multiple linear regression model.  
22  
23  
24  
25  
26  
27

### 28 **Procedures**

29  
30 Consenting participants completed an online survey implemented through JISC Online Survey  
31 (<https://www.onlinesurveys.ac.uk/>). In the first wave of data collection reported here, the survey included  
32 validated measures capturing the mental health outcomes: anxiety ( $\alpha=0.88$ ), depression ( $\alpha=0.92$ ) and stress  
33 ( $\alpha=0.76$ ).<sup>22-25</sup> Depression was measured using the 9-item Patient Health Questionnaire (PHQ-9) where  
34 participants were asked how often, over the past 2 weeks, they were bothered by each problem and selected their  
35 answers from a 4-point scale ranging from “not at all” (0) to “nearly every day” (3). PHQ-9 scores range from 0  
36 to 27 with higher scores indicating worse levels of depression severity. Anxiety was measured using the 7-item  
37 Generalized Anxiety Disorder Scale (GAD-7) where participants were asked how often, during the last 2 weeks,  
38 they have been bothered by each problem and selected their responses from a 4-point list: “not at all” – “nearly  
39 every day” (0-3). GAD-7 scores range from 0 to 21 with higher scores indicating worse anxiety levels. Stress  
40 was measured using the 4-item Perceived Stress Scale (PSS-4) where participants were asked to rate how often  
41 they have experienced stress over the last two weeks on a 5-point scale ranging from “Never” (0) to “Very  
42 often” (4). Total scores of PSS-4 range from 0 to 16 with higher scores indicating higher levels of stress.  
43  
44 We also measured modifiable and non-modifiable variables we hypothesised would be related to these mental  
45 health outcomes due to being (i) associated with an increased risk of contracting COVID-19 and/or adverse  
46 disease outcomes; or (ii) known to be directly associated with adverse mental health outcomes. These were: age,  
47  
48  
49  
50  
51  
52  
53  
54  
55  
56  
57  
58  
59  
60

1  
2  
3 gender, ethnicity, key-worker status, living alone, positive mood, worry about contracting COVID-19 and  
4 perceived loneliness and risk of COVID-19 (see supplementary appendix 1). Positive mood was measured using  
5 six items from the Scale of Positive and Negative Experience (SPANE).<sup>25</sup> Total scores of positive mood range  
6 from 6 to 30 with higher scores indicating greater positive mood. COVID-19 risk status, perceived risk of  
7 contracting COVID-19, COVID-19 worry, perceived loneliness, and living alone were all measured using single  
8 items which are described in supplementary appendix 1.  
9  
10  
11  
12  
13  
14  
15  
16  
17

### 18 **Statistical analysis**

19  
20 We first summarised the outcome variables (depression, anxiety and stress scores) and participant characteristics  
21 with appropriate summary statistics and examined histograms and scatterplots. Comparisons with pre-pandemic  
22 normative values were made using independent samples t-tests. Examination of histograms indicated both  
23 depression and anxiety scores deviated from a normal distribution, however transformations or non-parametric  
24 tests were not suitable for these comparisons as only summary statistics not individual level data were available  
25 for normative data. While t-tests are robust to deviations from normality especially when sample sizes are  
26 large<sup>26</sup>, results of these specific tests should be interpreted with appropriate caution. To explore the associations  
27 between the outcome variables and non-modifiable and modifiable explanatory factors we first conducted  
28 univariable linear regression analyses (see supplementary appendix 2). Multivariable linear regression analyses  
29 were then used to explore the independent relationships of non-modifiable factors (age, gender, ethnicity,  
30 keyworker status, living alone, being in a recognised COVID-19 risk group) on outcome variables. Then, in  
31 subsequent models, modifiable explanatory factors (perceived loneliness, perceived risk of COVID-19, positive  
32 mood, worry about contracting COVID-19) were added to examine the additional and independent contribution  
33 of these factors to explaining variation in the outcome variables. The variable assessing COVID-19 worry was  
34 treated as a categorical variable in all models, with “occasional worry” treated as the reference value as this was  
35 the most common response. Assumptions of linear regression (normality and homoscedasticity of residuals,  
36 linearity with continuous variables) and presence of outliers were assessed graphically. Multicollinearity was  
37 checked for all models using variance inflation factors (VIF) and found to have acceptable levels. Square root  
38 transformations were used for depression and anxiety scores to satisfy assumptions. Robustness of the models  
39 was examined by removing data points with large residuals (<-3 or >3) and comparing results to the original  
40 models. In the vast majority of models, this had no substantive effect on interpretation. Thus these results are  
41  
42  
43  
44  
45  
46  
47  
48  
49  
50  
51  
52  
53  
54  
55  
56  
57  
58  
59  
60

1  
2  
3 only mentioned where interpretation may be affected. Additionally, as perceived risk of getting COVID-19 was  
4 not assessed in those who thought they had had it (n=519) these participants are not represented in final  
5 multivariable models. As a sensitivity analysis, models were additionally re-specified excluding this explanatory  
6 variable (see supplementary appendix 3).  
7

8  
9  
10 For depression and anxiety we also carried out additional analyses dichotomising according to established cut-  
11 offs (scores of 10 or greater indicating moderate or severe levels)<sup>22,23</sup>. We used multiple logistic regression to  
12 estimate odds ratios with 95% confidence intervals for their associations with non-modifiable and modifiable  
13 variables.  
14  
15

16  
17  
18 Statistical analyses were performed using STATA (version 16).  
19  
20

### 21 22 **Role of sponsor**

23  
24 The study sponsor did not play a role in the study design, collection; analysis, and interpretation of data; in the  
25 writing of the report; or in the decision to submit the paper for publication.  
26  
27  
28

## 29 30 **Results**

### 31 32 **Cohort characteristics**

33  
34 The final number of participants recruited was n=3102. Of these, five were ineligible due to being less than 18  
35 years old. Thus, yielding n=3097 eligible participants. The largest proportion of visitors to the website came  
36 direct to the URL (62%/n=15,218), followed by 25% (n=6068) via Facebook (the remainder through other  
37 websites). The vast majority of respondents accessed the website via a mobile phone (70%/n=17045). The  
38 survey was completed in full by 100% of those who started it, consequently there were no missing data, with the  
39 exception of age, for which 2 participants entered non-numeric values.  
40  
41

42  
43 Table 1 summarises the main characteristics of the participants, alongside comparative data on UK population  
44 values where available. This shows that females were proportionally over-represented and participants older  
45 than 75 years, and from Northern Ireland, were under-represented in the current cohort. Otherwise the sample  
46 was reasonably representative of the wider UK population. The cohort had a mean age of 44 years (standard  
47 deviation=15); and 10% (n=296) from minority ethnic backgrounds. Fifty percent (n=1559) described  
48 themselves as key-workers (39%/n=1198 identifying as working in health and social care). Twenty percent  
49 (n=649) identified themselves as having clinical risk factors which would put them at increased or greatest risk  
50 of COVID-19.  
51  
52  
53  
54  
55  
56  
57  
58  
59  
60

**Table 1: Participant Demographics (n=3097) and UK population values**

|                                                              | Participants | UK population      |
|--------------------------------------------------------------|--------------|--------------------|
|                                                              | n (%)        | n (%)              |
| <b>Gender <sup>a</sup></b>                                   |              |                    |
| Male                                                         | 476 (15.4%)  | 32,978,229 (49.4%) |
| Female                                                       | 2618 (84.5%) | 33,818,578 (50.6%) |
| Prefer not to say                                            | 3 (0.1%)     | NR                 |
| <b>Age groups (years) <sup>a</sup></b>                       |              |                    |
|                                                              |              | 52,673,433         |
| 18-24                                                        | 364 (11.8%)  | 5,647,655 (10.7%)  |
| 25-34                                                        | 528 (17.1%)  | 9,011,381 (17.1%)  |
| 35-44                                                        | 637 (20.6%)  | 8,415,206 (16.0%)  |
| 45-54                                                        | 690 (22.3%)  | 9,063,137 (17.2%)  |
| 55-64                                                        | 570 (18.4%)  | 8,161,093 (15.4%)  |
| 65-74                                                        | 257 (8.3%)   | 6,687,066 (12.7%)  |
| ≥75                                                          | 49 (1.6%)    | 5,687,895 (10.8%)  |
| <b>Ethnicity <sup>b</sup></b>                                |              |                    |
| White – British, Irish, other                                | 2796 (90.3%) | 48,209,395 (86.0%) |
| Asian/Asian British – Indian, Pakistani, Bangladeshi, other  | 119 (3.8%)   | 3,820,390 (6.8%)   |
| Black/Black British – Caribbean, African, other              | 42 (1.4%)    | 1,864,890 (3.3%)   |
| Chinese/Chinese British                                      | 28 (0.9%)    | 393,141 (0.7%)     |
| Mixed race – White and Black/Black British                   | 19 (0.6%)    | 934,416 (1.7%)     |
| Middle Eastern/Middle Eastern British – Arab, Turkish, other | 23 (0.7%)    | NR                 |
| Mixed race – other                                           | 40 (1.3%)    | 289,984 (0.5%)     |
| Other ethnic group                                           | 25 (0.8%)    | 563,696 (1.0%)     |
| Prefer not to say                                            | 5 (0.2%)     | NR                 |
| <b>Relationship status</b>                                   |              |                    |
| Single, never married                                        | 574 (18.5%)  | NR                 |
| Single, divorced or widowed                                  | 263 (8.5%)   | NR                 |
| In a relationship/married but living apart                   | 254 (8.2%)   | NR                 |
| In a relationship/married and cohabiting                     | 1981 (64.0%) | NR                 |
| Prefer not to say                                            | 25 (0.8%)    | NR                 |
| <b>Education (highest level of attainment)</b>               |              |                    |
| No qualifications                                            | 33 (1.1%)    | NR                 |
| Completed GSCE/CSE/O-levels or equivalent                    | 252 (8.1%)   | NR                 |
| Completed post-16 vocational course                          | 101 (3.3%)   | NR                 |
| A-levels or equivalent (at school until aged 18)             | 403 (13.0%)  | NR                 |
| Undergraduate degree or professional qualification           | 1306 (42.2%) | NR                 |
| Postgraduate degree                                          | 976 (31.5%)  | NR                 |
| Prefer not to say                                            | 26 (0.8%)    | NR                 |
| <b>Place of residence <sup>a</sup></b>                       |              |                    |
| South West England                                           | 241 (7.8%)   | 5,624,696 (8.4%)   |
| East Midlands                                                | 762 (24.6%)  | 4,835,928 (7.2%)   |

1  
2  
3  
4  
5  
6  
7  
8  
9  
10  
11  
12  
13  
14  
15  
16  
17  
18  
19  
20  
21  
22  
23  
24  
25  
26  
27  
28  
29  
30  
31  
32  
33  
34  
35  
36  
37  
38  
39  
40  
41  
42  
43  
44  
45  
46  
47  
48  
49  
50  
51  
52  
53  
54  
55  
56  
57  
58  
59  
60

|                                                                                                                |              |                   |
|----------------------------------------------------------------------------------------------------------------|--------------|-------------------|
| Yorkshire and Humber                                                                                           | 293 (9.5%)   | 5,502,967 (8.2%)  |
| North East                                                                                                     | 147 (4.8%)   | 2,669,941 (4.0%)  |
| East of England                                                                                                | 153 (4.9%)   | 6,236,072 (9.3%)  |
| North West                                                                                                     | 357 (11.5%)  | 7,341,196 (11.0%) |
| South East England                                                                                             | 415 (13.4%)  | 9,180,135 (13.7%) |
| Greater London                                                                                                 | 329 (10.6%)  | 8,961,989 (13.4%) |
| West Midlands                                                                                                  | 165 (5.3%)   | 5,934,037 (8.9%)  |
| Northern Ireland                                                                                               | 8 (0.3%)     | 1,893,667 (2.8%)  |
| Wales                                                                                                          | 73 (2.4%)    | 3,152,879 (4.7%)  |
| Scotland                                                                                                       | 154 (5.0%)   | 5,463,300 (8.2%)  |
| <b>Key-worker status</b>                                                                                       |              |                   |
| Health, social care or relevant related support worker                                                         | 1198 (38.7%) | NR                |
| Teacher or childcare worker still travelling in to work                                                        | 70 (2.3%)    | NR                |
| Transport worker still travelling in to work                                                                   | 1 (0.03%)    | NR                |
| Food chain worker (e.g. production, sale, delivery)                                                            | 33 (1.1%)    | NR                |
| Key public services worker (e.g. justice staff, religious staff, public service journalist or mortuary worker) | 22 (0.7%)    | NR                |
| Local or national government worker delivering essential public services                                       | 41 (1.3%)    | NR                |
| Utility worker (e.g. energy, sewerage, postal service)                                                         | 5 (0.2%)     | NR                |
| Public safety or national security worker                                                                      | 11 (0.4%)    | NR                |
| Worker involved in medicines or protective equipment production or distribution                                | 10 (0.3%)    | NR                |
| Other key worker role not listed                                                                               | 168 (5.4%)   | NR                |
| Not a key worker                                                                                               | 1538 (49.7%) | NR                |
| <b>Living alone (or with others)</b>                                                                           |              |                   |
| Living alone                                                                                                   | 406 (13.1%)  | NR                |
| Living with others                                                                                             | 2691 (86.9%) | NR                |
| <b>COVID-19 risk groups</b>                                                                                    |              |                   |
| Most at risk (e.g. suffering from advanced cancer, severe asthma/COPD, etc.)                                   | 121 (3.9%)   | NR                |
| At increased risk (e.g., being pregnant, aged over 70, etc.)                                                   | 528 (17.1%)  | NR                |
| Not at-risk                                                                                                    | 2448 (79.0%) | NR                |

<sup>a</sup> UK population estimates from Office for National Statistics, mid-year estimates 2019.

<sup>b</sup> UK population estimates from 2011 census data.

NR not reported or not available

### **Mental health status**

Table 2 summarises findings in relation to levels of stress, anxiety and depression in the cohort. The mean values for all measures indicate levels that are higher in women than men and decrease with age. Overall mean values are significantly higher than previously reported population norms<sup>27-29</sup>. For both anxiety and depression the means for the cohort were higher for both genders compared with their respective population norms, and also for all age ranges between 25-64 years. In contrast, both men and women aged over 65 years had anxiety and depression scores consistent with previous population norms. The data suggested no significant differences in stress scores by gender, despite the combined mean score exceeding the population norm. Means scores for

1  
2  
3 depression, anxiety, and stress weighted to reflect the most recent UK age and gender distributions (Office for  
4 National Statistics, mid-year estimates 2019) are presented in supplementary appendix 4 and show similarly  
5 elevated levels in both men and women compared to pre-pandemic population norms.  
6  
7

8  
9 Table 3 shows the categorisation of participants in line with established cut-offs for anxiety and depression. This  
10 shows 64% of participants reported symptoms of depression and 57% reported symptoms of anxiety. When  
11 considering the thresholds at which someone would qualify for high intensity psychological support (score of 10  
12 or greater) in the NHS,<sup>26</sup> we observe that 31.6% reported moderate to severe depression and 26% moderate to  
13 severe anxiety.  
14  
15  
16  
17  
18  
19  
20  
21  
22  
23  
24  
25  
26  
27  
28  
29  
30  
31  
32  
33  
34  
35  
36  
37  
38  
39  
40  
41  
42  
43  
44  
45  
46  
47  
48  
49  
50  
51  
52  
53  
54  
55  
56  
57  
58  
59  
60

For peer review only



Table 2: Depression (PHQ-9), anxiety (GAD-7) and stress (PSS-4) scores and published population normative data†

|                           | PHQ-9 score  |            |                | GAD-7 score  |            |                | PSS-4 score  |            |                |
|---------------------------|--------------|------------|----------------|--------------|------------|----------------|--------------|------------|----------------|
|                           | Participants | Norms      | t              | Participants | Norms      | t              | Participants | Norms      | t              |
|                           | Mean (SD)    | Mean (SD)  |                | Mean (SD)    | Mean (SD)  |                | Mean (SD)    | Mean (SD)  |                |
| <b>Total Score</b>        | 7.69 (6.0)   | 2.91 (3.5) | 45.31****      | 6.59 (5.6)   | 2.95 (3.4) | 36.52****      | 6.48 (3.3)   | 6.11 (3.1) | 3.80****       |
| <b>Gender</b>             |              |            |                |              |            |                |              |            |                |
| Male                      | 6.49 (6.1)   | 2.7 (3.5)  | 18.56****      | 5.22 (5.4)   | 2.66 (3.2) | 13.77****      | 5.88 (3.3)   | 5.56 (3.0) | 1.57 (p=0.12)  |
| Female                    | 7.91 (6.0)   | 3.1 (3.5)  | 35.80****      | 6.84 (5.5)   | 3.20 (3.5) | 28.83****      | 6.59 (3.3)   | 6.38 (3.2) | 1.73 (p=0.084) |
| <b>Age groups (years)</b> |              |            |                |              |            |                |              |            |                |
| 18-24                     | 11.24 (6.4)  | ..         | ..             | 9.02 (6.0)   | ..         | ..             | 8.13 (3.3)   | ..         | ..             |
| 25-34                     | 8.74 (5.9)   | 2.3 (3.2)  | 23.56****      | 7.73 (5.6)   | 2.81 (3.3) | 13.85****      | 6.94 (3.3)   | ..         | ..             |
| 35-44                     | 8.23 (6.0)   | 2.6 (3.5)  | 23.45****      | 7.25 (5.7)   | 2.82 (3.3) | 14.09****      | 6.467 (3.2)  | ..         | ..             |
| 45-54                     | 7.32 (5.7)   | 2.8 (3.5)  | 19.24****      | 6.28 (5.3)   | 3.14 (3.4) | 10.71****      | 6.16 (3.0)   | ..         | ..             |
| 55-64                     | 6.35 (5.6)   | 3.2 (3.5)  | 13.03****      | 5.43 (5.1)   | 3.25 (3.6) | 7.36****       | 5.94 (3.2)   | ..         | ..             |
| 65-74                     | 3.83 (4.3)   | 3.3 (3.6)  | 1.95 (p=0.051) | 3.32 (3.8)   | 2.79 (3.2) | 1.92 (p=0.056) | 5.07 (3.0)   | ..         | ..             |
| ≥75                       | 4.39 (5.8)   | 4.4 (3.9)  | 0.02 (p=0.99)  | 2.92 (4.4)   | 3.05 (3.4) | 0.21 (p=0.83)  | 4.80 (3.0)   | ..         | ..             |

† PHQ-9, the 9-item Patient Health Questionnaire;<sup>22</sup> GAD-7, the 7-item Generalized Anxiety Disorder Scale;<sup>23</sup> PSS-4, the 4-item Perceived Stress Scale.<sup>24</sup> Published population normative data for PHQ-9<sup>27</sup>, GAD-7<sup>29</sup>, PSS-4<sup>28</sup>.

\*\*\*\* p<0.0001, \*\*\* p<0.001, \*\* p<0.01, \* p<0.05

**Table 3: Prevalence of depressive and anxiety cases<sup>†</sup>**

| Categories                            | Whole sample                                |      | Male |     | Female |      |      |
|---------------------------------------|---------------------------------------------|------|------|-----|--------|------|------|
|                                       | n                                           | %    | n    | %   | n      | %    |      |
| <b>Depression (PHQ-9<sup>‡</sup>)</b> | <i>No-Minimal Depression (0-4)</i>          | 1125 | 36.3 | 230 | 48.3   | 894  | 34.1 |
|                                       | <i>Mild Depression (5-9)</i>                | 994  | 32.1 | 125 | 26.3   | 868  | 33.2 |
|                                       | <i>Moderate Depression (10-14)</i>          | 525  | 17.0 | 64  | 13.4   | 461  | 17.6 |
|                                       | <i>Moderately Severe Depression (15-19)</i> | 276  | 8.9  | 35  | 7.4    | 241  | 9.2  |
|                                       | <i>Severe Depression (20-27)</i>            | 177  | 5.7  | 22  | 4.6    | 154  | 5.9  |
| <b>Anxiety (GAD-7<sup>‡</sup>)</b>    | <i>No-Minimal Anxiety (0-4)</i>             | 1344 | 43.4 | 276 | 58.0   | 1066 | 40.7 |
|                                       | <i>Mild Anxiety (5-9)</i>                   | 947  | 30.6 | 108 | 22.7   | 839  | 32.0 |
|                                       | <i>Moderate Anxiety (10-14)</i>             | 430  | 13.9 | 44  | 9.2    | 386  | 14.7 |
|                                       | <i>Severe Anxiety (15-21)</i>               | 376  | 12.1 | 48  | 10.1   | 327  | 12.5 |

<sup>†</sup> Cut-offs for categories in line with published guidelines for PHQ-9<sup>23</sup> and GAD-7.<sup>25</sup>

<sup>‡</sup> PHQ-9, the 9-item Patient Health Questionnaire;<sup>19</sup> GAD-7, the 7-item Generalized Anxiety Disorder Scale.<sup>20</sup>

### Individuals at greatest risk of mental health problems: associations with age, gender, ethnicity, living alone and key-worker status

When non-modifiable explanatory variables were included in a multivariable model (Table 4), we observed that for depression (square-root transformed scores), being younger ( $B=-0.30$ , 95% CI: -0.33, -0.27 per decade), female ( $B=0.36$ , 95% CI: 0.25, 0.47), living alone ( $B=0.34$ , 95% CI: 0.25, 0.47) and being in a recognised risk group for COVID-19 (“most at risk” group:  $B=0.56$ , 95% CI: 0.35, 0.77; “increased risk” group:  $B=0.27$ , 95% CI: 0.16, 0.38) were all independently significantly associated with greater levels of depression. This model accounted for 14% of the variance in depression scores. These results were replicated when considering depression as a binary outcome (i.e., cases requiring high intensity intervention versus not) with those in recognised risk groups for COVID-19 being more likely to have a depression score above 10 with 98% increased odds in the “most at risk” group and 63% increased odds in those in the “increased risk” group compared to those in neither risk group. In addition, females had a 50% increased odds of having depression scores above 10 and living alone was associated with a 53% increase.

**Table 4: Regression models showing associations between non-modifiable explanatory variables and depression scores**

|                                            | Regression coefficient (B) | 95% CI Lower | 95% CI Upper | $\beta$ | $p$        |
|--------------------------------------------|----------------------------|--------------|--------------|---------|------------|
| <b>PHQ-9 Total Score<sup>a</sup></b>       |                            |              |              |         |            |
| Age (per decade)                           | -0.30                      | -0.33        | -0.27        | -0.36   | <.0001**** |
| Female                                     | 0.36                       | 0.25         | 0.47         | 0.11    | <.0001**** |
| Live alone                                 | 0.33                       | 0.21         | 0.45         | 0.09    | <.0001**** |
| BAME background                            | 0.03                       | -0.11        | 0.17         | 0.01    | 0.70       |
| Key-worker                                 | 0.08                       | -0.00        | 0.16         | 0.03    | 0.07       |
| Risk Group <sup>b</sup>                    |                            |              |              |         |            |
| Most at risk                               | 0.56                       | 0.35         | 0.77         | 0.09    | <.0001**** |
| Increased risk                             | 0.27                       | 0.16         | 0.38         | 0.08    | <.0001**** |
| <b>Adjusted R<sup>2</sup>=0.14, n=3090</b> |                            |              |              |         |            |
|                                            | Odds Ratio                 | 95% CI Lower | 95% CI Upper | $\beta$ | $p$        |
| <b>PHQ-9 “Cases”<sup>c</sup></b>           |                            |              |              |         |            |
| Age (per decade)                           | 0.65                       | 0.61         | 0.69         | -1.38   | <.0001**** |
| Female                                     | 1.50                       | 1.19         | 1.89         | 0.31    | <.001***   |
| Live alone                                 | 1.53                       | 1.21         | 1.93         | 0.31    | <.001***   |
| BAME background                            | 1.14                       | 0.88         | 1.48         | 0.08    | 0.31       |
| Key-worker                                 | 1.16                       | 0.99         | 1.36         | 0.16    | 0.06       |
| Risk Group <sup>b</sup>                    |                            |              |              |         |            |
| Most at Risk                               | 1.98                       | 1.33         | 2.94         | 0.28    | <.001***   |
| Increased Risk                             | 1.63                       | 1.31         | 2.02         | 0.39    | <.0001**** |
| <b>Pseudo R<sup>2</sup>=0.07, n=3090</b>   |                            |              |              |         |            |

\*\*\*\*  $p<0.0001$ , \*\*\*  $p<0.001$ , \*\*  $p<0.01$ , \*  $p<0.05$

<sup>a</sup> A square-root transformation was applied to the dependent variable.

<sup>b</sup> Comparison reference group “I am in neither risk category”.

<sup>c</sup> a “case” is defined as a PHQ-9 score greater than or equal to 10, at which level someone would qualify for high intensity psychological support in the NHS.

For anxiety (square-root transformed scores) being younger ( $B=-0.26$ , 95% CI: -0.29, -0.23 per decade), female ( $B=0.43$ , 95% CI: 0.32, 0.55), being a key-worker ( $B=0.09$ , 95% CI: 0.01, 0.18), and being in a recognised

COVID-19 risk group (“most at risk” group: B=0.42, 95% CI: 0.20, 0.63; “increased risk” group: B=0.21, 95% CI: 0.10, 0.33) were independently significantly associated with greater levels of anxiety (Table 5). This model accounted for 11% of the variance in anxiety scores and these results were replicated when considering anxiety as a binary outcome (i.e., cases requiring high intensity intervention versus not), with the exception that being a key-worker was no longer a statistically significant independent predictor.

**Table 5: Regression models showing associations between non-modifiable explanatory variables and anxiety scores**

|                                            | B          | 95% CI Lower | 95% CI Upper | $\beta$ | p          |
|--------------------------------------------|------------|--------------|--------------|---------|------------|
| <b>GAD-7 Total Score<sup>a</sup></b>       |            |              |              |         |            |
| Age (per decade)                           | -0.26      | -0.29        | -0.23        | -0.31   | <.0001**** |
| Female                                     | 0.43       | 0.32         | 0.55         | 0.13    | <.0001**** |
| Live alone                                 | -0.04      | -0.16        | 0.08         | -0.01   | 0.51       |
| BAME background                            | 0.02       | -0.12        | 0.16         | 0.00    | 0.81       |
| Key-worker                                 | 0.09       | 0.01         | 0.18         | 0.04    | 0.03*      |
| Risk Group <sup>b</sup>                    |            |              |              |         |            |
| Most at Risk                               | 0.42       | 0.20         | 0.63         | 0.07    | <.001***   |
| Increased Risk                             | 0.21       | 0.10         | 0.33         | 0.07    | <.001***   |
| <b>Adjusted R<sup>2</sup>=0.11, n=3090</b> |            |              |              |         |            |
|                                            | Odds Ratio | 95% CI Lower | 95% CI Upper | $\beta$ | p          |
| <b>GAD-7 “Cases”<sup>c</sup></b>           |            |              |              |         |            |
| Age (per decade)                           | 0.69       | 0.65         | 0.73         | -1.28   | <.0001**** |
| Female                                     | 1.61       | 1.25         | 2.08         | 0.39    | <.001***   |
| Live alone                                 | 1.00       | 0.77         | 1.30         | 0.00    | 0.98       |
| BAME background                            | 1.15       | 0.88         | 1.50         | 0.09    | 0.32       |
| Key-worker                                 | 1.14       | 0.97         | 1.35         | 0.15    | 0.12       |
| Risk Group <sup>b</sup>                    |            |              |              |         |            |
| Most at Risk                               | 1.78       | 1.18         | 2.67         | 0.25    | 0.005**    |
| Increased Risk                             | 1.30       | 1.03         | 1.64         | 0.22    | 0.03*      |
| <b>Pseudo R<sup>2</sup>=0.05, n=3090</b>   |            |              |              |         |            |

\*\*\*\*  $p < 0.0001$ , \*\*\*  $p < 0.001$ , \*\*  $p < 0.01$ , \*  $p < 0.05$

<sup>a</sup> A square-root transformation was applied to the dependent variable.

<sup>b</sup> Comparison reference group “I am in neither risk category”.

<sup>c</sup> a “case” is defined as a GAD-7 score greater than or equal to 10, at which level someone would qualify for high intensity psychological support in the NHS.

For stress scores, being younger (B=-0.56, 95% CI: -0.64, -0.49 per decade), female (B=0.78, 95% CI: 0.46, 1.09), living alone (B=0.46, 95% CI: 0.12, 0.79), being from a BAME background (B=0.44, 95% CI: 0.05, 0.82), and being from an identified COVID-19 risk group (“most at risk” group: B=1.10, 95% CI: 0.51, 1.68; “increased risk” group: B=0.40, 95% CI: 0.09, 0.71) were all independently significantly associated with greater stress scores. In robustness analyses, when removing large standardised residuals (<-3 or >3) being a key-worker was also a statistically significant independent predictor (B=-0.22, 95% CI: -0.45, -0.002) such that being a key-worker was associated with lower stress scores). Together the model accounted for 7% of the variance in stress scores (Table 6).

**Table 6: Regression model showing associations between non-modifiable explanatory variables and stress scores**

|                                            | B     | 95% CI Lower | 95% CI Upper | $\beta$ | <i>p</i>   |
|--------------------------------------------|-------|--------------|--------------|---------|------------|
| <b>PSS-4 Total Score</b>                   |       |              |              |         |            |
| Age (per decade)                           | -0.56 | -0.64        | -0.49        | -0.26   | <.0001**** |
| Female                                     | 0.78  | 0.47         | 1.09         | 0.09    | <.0001**** |
| Live alone                                 | 0.46  | 0.12         | 0.79         | 0.05    | 0.008**    |
| BAME background                            | 0.44  | 0.05         | 0.82         | 0.04    | 0.03*      |
| Key-worker                                 | -0.22 | -0.45        | 0.00         | -0.03   | 0.06       |
| Risk Group <sup>a</sup>                    |       |              |              |         |            |
| Most at Risk                               | 1.10  | 0.51         | 1.68         | 0.06    | <.001***   |
| Increased Risk                             | 0.40  | 0.09         | 0.71         | 0.05    | 0.01*      |
| <b>Adjusted R<sup>2</sup>=0.07, n=3090</b> |       |              |              |         |            |

\*\*\*\*  $p < 0.0001$ , \*\*\*  $p < 0.001$ , \*\*  $p < 0.01$ , \*  $p < 0.05$

<sup>a</sup> Comparison reference group "I am in neither risk category".

### Individuals at greatest risk of mental health problems: associations with perceived risk of COVID-19, perceived loneliness, COVID-19 worry and positive mood

Table 7 shows scores for modifiable explanatory variables (perceived risk, perceived loneliness, COVID-19 worry, and positive mood) across the whole sample, as well as by gender and age-groups.

**Table 7: Loneliness, worry about COVID-19, perceived risk of COVID-19, and positive mood**

|                                   | Whole sample | Gender      |              | Age groups (years) |             |             |             |             |             |             |
|-----------------------------------|--------------|-------------|--------------|--------------------|-------------|-------------|-------------|-------------|-------------|-------------|
|                                   |              | Male        | Female       | 18-24              | 25-34       | 35-44       | 45-54       | 55-64       | 65-74       | ≥75         |
| <b>Loneliness</b>                 |              |             |              |                    |             |             |             |             |             |             |
| Mean (SD)                         | 3.86 (2.7)   | 3.56 (2.7)  | 3.91 (2.7)   | 5.34 (2.7)         | 4.36 (2.7)  | 3.75 (2.7)  | 3.61 (2.8)  | 3.49 (2.7)  | 2.70 (2.1)  | 2.65 (2.4)  |
| <b>Positive mood</b>              |              |             |              |                    |             |             |             |             |             |             |
| Mean (SD)                         | 18.99 (5.1)  | 19.76 (5.1) | 18.85 (5.0)  | 17.68 (4.9)        | 18.82 (5.1) | 18.68 (5.0) | 18.93 (5.1) | 19.35 (5.0) | 20.71 (4.7) | 22.59 (4.5) |
| <b>Perceived risk of COVID-19</b> |              |             |              |                    |             |             |             |             |             |             |
| Mean (SD)                         | 4.75 (2.2)   | 4.46 (2.2)  | 4.80 (2.2)   | 4.10 (2.0)         | 4.92 (2.2)  | 5.14 (2.2)  | 5.01 (2.2)  | 4.78 (2.3)  | 4.20 (2.1)  | 3.00 (1.7)  |
| <b>Worry about COVID-19</b>       |              |             |              |                    |             |             |             |             |             |             |
| No worry (n, %)                   | 512 (16.5%)  | 105 (22.1%) | 406 (15.5%)  | 105 (28.9%)        | 108 (20.5%) | 92 (14.4%)  | 92 (13.3%)  | 65 (11.4%)  | 39 (15.2%)  | 10 (20.4%)  |
| Occasional worry (n, %)           | 2050 (66.2%) | 318 (66.8%) | 1731 (66.1%) | 209 (57.4%)        | 320 (60.6%) | 428 (67.2%) | 468 (67.8%) | 398 (69.8%) | 191 (74.3%) | 36 (73.5%)  |
| Much worry (n, %)                 | 413 (13.3%)  | 40 (8.4%)   | 373 (14.3%)  | 39 (10.7%)         | 77 (14.6%)  | 91 (14.3%)  | 94 (13.7%)  | 85 (14.9%)  | 24 (9.3%)   | 2 (4.1%)    |
| Most worry (n, %)                 | 122 (3.9%)   | 13 (2.7%)   | 108 (4.1%)   | 11 (3.0%)          | 23 (4.4%)   | 26 (4.1%)   | 36 (5.2%)   | 22 (3.9%)   | 3 (1.2%)    | 1 (2.0%)    |

When modifiable explanatory variables were added into the multivariable model for depression: this revealed that greater perceived loneliness (B=0.10, 95% CI: 0.09, 0.12), lower positive mood (B=-0.12, 95% CI: -0.12, -0.11) and greater than occasional worry about getting COVID-19 (much of time: B=0.26, 95% CI: 0.16, 0.36; most of time: B=0.30, 95% CI: 0.12, 0.48), were all independently and significantly associated with greater levels of depression, in addition to age, gender and being in a recognised COVID-19 risk group. The model accounted for 57% of the variance in depression scores. These results were largely replicated when considering depression as a binary outcome although gender and being in the “most at risk” group were no longer statistically significant (Table 8).

**Table 8: Regression models showing associations between modifiable explanatory variables and depression scores**

|                                            | B          | 95% CI Lower | 95% CI Upper | $\beta$ | p          |
|--------------------------------------------|------------|--------------|--------------|---------|------------|
| <b>PHQ-9 Total Score<sup>a</sup></b>       |            |              |              |         |            |
| Age (per decade)                           | -0.19      | -0.21        | -0.17        | -0.24   | <.0001**** |
| Female                                     | 0.19       | 0.10         | 0.28         | 0.06    | <.0001**** |
| Live alone                                 | 0.01       | -0.09        | 0.11         | 0.00    | 0.79       |
| BAME background                            | -0.02      | -0.14        | 0.09         | -0.01   | 0.67       |
| Key-worker                                 | 0.02       | -0.05        | 0.09         | 0.01    | 0.52       |
| Risk Group <sup>b</sup>                    |            |              |              |         |            |
| Most at Risk                               | 0.26       | 0.09         | 0.43         | 0.04    | 0.002**    |
| Increased Risk                             | 0.20       | 0.11         | 0.29         | 0.06    | <.0001**** |
| Perceived loneliness (per unit)            | 0.10       | 0.09         | 0.12         | 0.22    | <.0001**** |
| Positive mood (per unit)                   | -0.12      | -0.12        | -0.11        | -0.48   | <.0001**** |
| COVID-19 worry <sup>c</sup>                |            |              |              |         |            |
| No worry                                   | 0.00       | -0.09        | 0.09         | 0.00    | 0.97       |
| Much of time                               | 0.26       | 0.16         | 0.36         | 0.07    | <.0001**** |
| Most of time                               | 0.30       | 0.12         | 0.48         | 0.05    | 0.001**    |
| Perceived risk of COVID-19 (per unit)      | 0.01       | -0.00        | 0.03         | 0.02    | 0.13       |
| <b>Adjusted R<sup>2</sup>=0.57, n=2494</b> |            |              |              |         |            |
|                                            | Odds Ratio | 95% CI Lower | 95% CI Upper | $\beta$ | p          |
| <b>PHQ-9 “Cases”<sup>d</sup></b>           |            |              |              |         |            |
| Age (per decade)                           | 0.66       | 0.61         | 0.72         | -1.38   | <.0001**** |
| Female                                     | 1.08       | 0.78         | 1.50         | 0.06    | 0.66       |
| Live alone                                 | 0.88       | 0.61         | 1.25         | -0.10   | 0.47       |
| BAME background                            | 0.96       | 0.65         | 1.40         | -0.03   | 0.82       |
| Key-worker                                 | 1.09       | 0.86         | 1.38         | 0.09    | 0.49       |
| Risk Group <sup>b</sup>                    |            |              |              |         |            |
| Most at Risk                               | 1.28       | 0.74         | 2.21         | 0.11    | 0.37       |
| Increased Risk                             | 1.61       | 1.19         | 2.19         | 0.40    | 0.002**    |
| Perceived loneliness (per unit)            | 1.22       | 1.16         | 1.28         | 1.19    | <.0001**** |
| Positive mood (per unit)                   | 0.76       | 0.74         | 0.79         | -3.01   | <.0001**** |
| COVID-19 worry <sup>c</sup>                |            |              |              |         |            |
| No worry                                   | 1.02       | 0.73         | 1.44         | 0.02    | 0.90       |
| Much of time                               | 1.67       | 1.23         | 2.28         | 0.38    | 0.001**    |
| Most of time                               | 2.02       | 1.13         | 3.62         | 0.29    | 0.02*      |
| Perceived risk of COVID-19 (per unit)      | 1.04       | 0.98         | 1.10         | 0.18    | 0.20       |
| <b>Pseudo R<sup>2</sup>=0.36, n=2494</b>   |            |              |              |         |            |

\*\*\*\*  $p < 0.0001$ , \*\*\*  $p < 0.001$ , \*\*  $p < 0.01$ , \*  $p < 0.05$

<sup>a</sup> A square-root transformation was applied to the dependent variable.

<sup>b</sup> Comparison reference group “I am in neither risk category”.

<sup>c</sup> Comparison reference group “I occasionally worry about getting COVID-19”.

<sup>d</sup> a “case” is defined as a PHQ-9 score greater than or equal to 10, at which level someone would qualify for high intensity psychological support in the NHS.

1  
2  
3 For anxiety, the model revealed that greater perceived loneliness (B=0.06, 95% CI: 0.04, 0.07), lower positive  
4 mood (B=-0.12, 95% CI: -0.13, -0.11) and greater perceived risk of COVID-19 (B=0.04, 95% CI: 0.02, 0.05)  
5 were all independently and significantly associated with greater anxiety, in addition to the non-modifiable  
6 factors of being younger, female and living alone. Further, those participants who experienced greater than  
7 occasional worry about getting COVID-19 were significantly more likely to have higher levels of anxiety (much  
8 of time: B=0.57, 95% CI: 0.47, 0.68; most of time: B=0.87, 95% CI: 0.68, 1.06); with those who did not worry  
9 at all about getting COVID-19 being likely to have lower anxiety (B=-0.18, 95% CI: -0.28, -0.09). The model  
10 accounted for 54% of the variance in anxiety scores. These results were largely replicated when considering  
11 anxiety as a binary outcome, although gender and not worrying at all about getting COVID-19 were no longer  
12 statistically significant (Table 9).  
13  
14  
15  
16  
17  
18  
19  
20  
21  
22  
23  
24  
25  
26  
27  
28  
29  
30  
31  
32  
33  
34  
35  
36  
37  
38  
39  
40  
41  
42  
43  
44  
45  
46  
47  
48  
49  
50  
51  
52  
53  
54  
55  
56  
57  
58  
59  
60



**Table 9: Regression models showing associations between modifiable explanatory variables and anxiety**

|                                           | <b>B</b>          | <b>95% CI Lower</b> | <b>95% CI Upper</b> | <b><math>\beta</math></b> | <b><i>p</i></b> |
|-------------------------------------------|-------------------|---------------------|---------------------|---------------------------|-----------------|
| <b>GAD-7 Total Score<sup>a</sup></b>      |                   |                     |                     |                           |                 |
| Age (per decade)                          | -0.16             | -0.18               | -0.14               | -0.20                     | <.0001****      |
| Female                                    | 0.25              | 0.16                | 0.34                | 0.07                      | <.0001****      |
| Live alone                                | -0.25             | -0.36               | -0.15               | -0.07                     | <.0001****      |
| BAME background                           | -0.08             | -0.19               | 0.04                | -0.02                     | 0.19            |
| Key-worker                                | -0.03             | -0.11               | 0.04                | -0.01                     | 0.34            |
| Risk Group <sup>b</sup>                   |                   |                     |                     |                           |                 |
| Most at Risk                              | 0.02              | -0.15               | 0.19                | 0.00                      | 0.83            |
| Increased Risk                            | 0.07              | -0.02               | 0.16                | 0.02                      | 0.13            |
| Perceived loneliness (per unit)           | 0.06              | 0.04                | 0.07                | 0.12                      | <.0001****      |
| Positive mood (per unit)                  | -0.12             | -0.13               | -0.11               | -0.48                     | <.0001****      |
| COVID-19 worry <sup>c</sup>               |                   |                     |                     |                           |                 |
| No worry                                  | -0.18             | -0.28               | -0.09               | -0.05                     | <.001***        |
| Much of time                              | 0.57              | 0.47                | 0.68                | 0.15                      | <.0001****      |
| Most of time                              | 0.87              | 0.68                | 1.06                | 0.13                      | <.0001****      |
| Perceived risk of COVID-19 (per unit)     | 0.04              | 0.02                | 0.05                | 0.06                      | <.0001****      |
| <b>Adjusted R<sup>2</sup>=.54, n=2494</b> |                   |                     |                     |                           |                 |
|                                           | <b>Odds Ratio</b> | <b>95% CI Lower</b> | <b>95% CI Upper</b> | <b><math>\beta</math></b> | <b><i>p</i></b> |
| <b>GAD-7 “Cases”<sup>d</sup></b>          |                   |                     |                     |                           |                 |
| Age (per decade)                          | 0.69              | 0.63                | 0.76                | -1.32                     | <.0001****      |
| Female                                    | 1.17              | 0.82                | 1.67                | 0.13                      | 0.38            |
| Live alone                                | 0.67              | 0.46                | 0.99                | -0.31                     | 0.04*           |
| BAME background                           | 0.96              | 0.65                | 1.44                | -0.03                     | 0.86            |
| Key-worker                                | 0.89              | 0.70                | 1.15                | -0.13                     | 0.38            |
| Risk Group <sup>b</sup>                   |                   |                     |                     |                           |                 |
| Most at Risk                              | 0.89              | 0.51                | 1.55                | -0.05                     | 0.67            |
| Increased Risk                            | 0.92              | 0.66                | 1.29                | -0.07                     | 0.64            |
| Perceived loneliness (per unit)           | 1.11              | 1.06                | 1.17                | 0.68                      | <.0001****      |
| Positive mood (per unit)                  | 0.77              | 0.75                | 0.80                | -3.08                     | <.0001****      |
| COVID-19 worry <sup>c</sup>               |                   |                     |                     |                           |                 |
| No worry                                  | 0.75              | 0.52                | 1.09                | -0.24                     | 0.13            |
| Much of time                              | 3.90              | 2.88                | 5.29                | 1.07                      | <.0001****      |
| Most of time                              | 11.63             | 5.91                | 22.90               | 1.06                      | <.0001****      |
| Perceived risk of COVID-19 (per unit)     | 1.07              | 1.01                | 1.14                | 0.35                      | 0.02*           |
| <b>Pseudo R<sup>2</sup>=0.36, n=2494</b>  |                   |                     |                     |                           |                 |

\*\*\*\*  $p < 0.0001$ , \*\*\*  $p < 0.001$ , \*\*  $p < 0.01$ , \*  $p < 0.05$

<sup>a</sup> A square-root transformation was applied to the dependent variable.

<sup>b</sup> Comparison reference group “I am in neither risk category”.

<sup>c</sup> Comparison reference group “I occasionally worry about getting COVID-19”.

<sup>d</sup> a “case” is defined as a GAD-7 score greater than or equal to 10, at which level someone would qualify for high intensity psychological support in the NHS.

The multivariable model for stress scores showed that greater perceived loneliness (B=0.19, 95% CI: 0.15, 0.23), lower positive mood (B=-0.38, 95% CI: -0.40, -0.36), greater than occasional worry about getting COVID-19 (much of time: B=0.37, 95% CI: 0.10, 0.63; most of time: B=1.02, 95% CI: 0.54, 1.50), and greater perceived risk of getting COVID-19 (B=0.06, 95% CI: 0.02, 0.11) were all independently and significantly associated with greater stress, in addition to being younger, female, living alone and not being a key-worker. In robustness analyses, when removing large standardised residuals (<-3 or >3) having a BAME background was also a statistically significant independent predictor (B=0.29, 95% CI: 0.00, 0.58). This model accounted for 57% of the variance in stress scores (Table 10).

**Table 10: Regression model showing associations between modifiable explanatory variables and stress scores**

|                                           | B     | 95% CI Lower | 95% CI Upper | $\beta$ | p          |
|-------------------------------------------|-------|--------------|--------------|---------|------------|
| <b>PSS-4 Total Score</b>                  |       |              |              |         |            |
| Age (per decade)                          | -0.25 | -0.31        | -0.18        | -0.12   | <.0001**** |
| Female                                    | 0.35  | 0.12         | 0.59         | 0.04    | 0.003**    |
| Live alone                                | -0.41 | -0.67        | -0.14        | -0.04   | 0.002**    |
| BAME background                           | 0.26  | -0.04        | 0.55         | 0.02    | 0.09       |
| Key-worker                                | -0.39 | -0.58        | -0.21        | -0.06   | <.0001**** |
| Risk Group <sup>b</sup>                   |       |              |              |         |            |
| Most at Risk                              | 0.03  | -0.41        | 0.47         | 0.00    | 0.90       |
| Increased Risk                            | 0.02  | -0.21        | 0.26         | 0.00    | 0.83       |
| Perceived loneliness (per unit)           | 0.19  | 0.15         | 0.23         | 0.15    | <.0001**** |
| Positive mood (per unit)                  | -0.38 | -0.40        | -0.36        | -0.60   | <.0001**** |
| COVID-19 worry <sup>a</sup>               |       |              |              |         |            |
| No worry                                  | -0.05 | -0.30        | 0.19         | -0.01   | 0.68       |
| Much of time                              | 0.37  | 0.10         | 0.63         | 0.04    | 0.007**    |
| Most of time                              | 1.02  | 0.54         | 1.50         | 0.06    | <.0001**** |
| Perceived risk of COVID-19 (per unit)     | 0.06  | 0.02         | 0.11         | 0.04    | 0.004**    |
| <b>Adjusted R<sup>2</sup>=.57, n=2494</b> |       |              |              |         |            |

\*\*\*\*  $p < 0.0001$ , \*\*\*  $p < 0.001$ , \*\*  $p < 0.01$ , \*  $p < 0.05$

<sup>a</sup> Comparison reference group "I occasionally worry about getting COVID-19".

<sup>b</sup> Comparison reference group "I am in neither risk category".

## Discussion

We report findings from the first wave of data collection from a community cohort study established in the UK to prospectively examine the mental health consequences of the COVID-19 pandemic. Our results pertain to the experiences of people within the first four to six weeks of social distancing measures being introduced, and focus on self-reported depression, anxiety and stress scores. The findings indicated that mean levels of depression, anxiety and stress significantly exceeded previously published population norms.<sup>27-29</sup> Models examining the relationship between these mental health outcomes and non-modifiable explanatory factors accounted for only a modest proportion of the variance (7-14%). Increased depression was associated with being younger, female, living alone and being in a recognised COVID-19 risk group; increased anxiety was associated with being younger, female and being in a recognised risk group; and increased stress was associated with being younger, female, living alone, being from a BAME background and a recognised risk group. In contrast, when we added the hypothesised modifiable variables into our multivariable models we observed that the final models accounted for a much larger proportion of the variance (54-57%) with significant independent effects emerging for lower positive mood and greater perceived loneliness and worry about getting COVID-19 associated with higher scores for all three outcomes, as well as greater perceived risk of COVID-19 emerging as significant for anxiety and stress.

These findings highlight a number of issues worthy of discussion. First, we acknowledge several limitations.

These include the cross-sectional design which impedes an analysis of cause and effect. Thus, while we report

1  
2  
3 on several significant associations it remains the case that we can't be certain whether the relationships are  
4 causal, or simply due to the presence of other unmeasured characteristics; or indeed be certain of the direction of  
5 these relationships (i.e., reverse causality). For example, it is possible that lower positive mood leads to greater  
6 depression and that greater depression leads to lower positive mood.  
7  
8

9  
10 A further limitation concerns the absence of information on pre-existing mental health conditions. This could  
11 have influenced the severity and prevalence of psychological morbidity reported in this study.<sup>1</sup> Furthermore, the  
12 self-selected community cohort design could have introduced sampling biases limiting the generalisability of  
13 our findings. For example, the spread of participants across the UK was limited and individuals with an interest  
14 in and experience of mental health difficulties may have been over-represented. . Furthermore, typical of  
15 previous online surveys concerned with mental health, women were over-represented in our sample.<sup>30</sup> Thus,  
16 while our comparisons with UK census and Office of National Statistics data (see Table 1) indicated that across  
17 many parameters our cohort were largely representative of the UK population; and our supplementary analysis  
18 (appendix 4) weighted by the age and gender distribution in the UK in 2019 confirmed the presence of increased  
19 stress, anxiety and depression compared with pre-pandemic norms, we acknowledge that these areas of  
20 sampling bias have implications for the generalisability of our findings. We also note that, typical of online  
21 surveys, we are unable to determine the extent to which our findings were affected by non-response bias. We  
22 took a number of steps to minimise this including ensuring brevity of the survey, designing it in conjunction  
23 with our virtual PPI group and conducting supplementary analyses weighted to reflect the most recent UK age  
24 and gender distributions. But this remains a potential source of bias in our findings. Finally, we also note that  
25 our comparisons with normative data were limited to the most recent data we were able to access. For stress and  
26 depression, comparisons were made with data reported in 2013, but for anxiety it was 2008. We acknowledge  
27 there may have been population shifts in mental health in the intervening years which may account, in part, for  
28 some of the increase in mental health difficulties reported here.  
29  
30

31  
32 A second observation is that both mean scores and measures of case-ness suggest that the COVID-19 pandemic  
33 may have contributed to an increased prevalence of mental health difficulties in the UK. This is true for  
34 depression, generalised anxiety disorder and stress and is in keeping with observations from other countries.<sup>3,4</sup>  
35 Indeed, the proportion of participants who would require intensive support for depression and anxiety in the  
36 NHS does not compare favourably with recent historical estimates of the prevalence of mental health problems  
37 in the UK. For example, the 2014 ONS report on adult psychiatric morbidity reported a prevalence of 17% for  
38 six different common mental disorders.<sup>31</sup> The prevalence of depression alone in the context of this pandemic is  
39  
40  
41  
42  
43  
44  
45  
46  
47  
48  
49  
50  
51  
52  
53  
54  
55  
56  
57  
58  
59  
60

1  
2  
3 almost double this. However, what we can't determine from this work is whether the apparent increase in  
4 psychological morbidity is an expected, but short-term response to the pandemic. Or if this distress is sustained  
5 over time and likely to warrant intervention. Longitudinal follow-ups of this and other cohorts will provide  
6 valuable data in this regard. Furthermore, as noted above, we also cannot be certain how much of the increase in  
7 psychological morbidity is attributable to the pandemic or a more general trend towards increased mental health  
8 concerns that has been suggested by some in recent years.<sup>32</sup>

9  
10  
11 Third, the non-modifiable explanatory variables significantly associated with increased levels for all three of our  
12 mental health outcomes were being younger, female and in a recognised COVID-19 risk group. The findings  
13 regarding gender and age are of course recognised risk factors for mental health<sup>33</sup> and are also consistent with  
14 unpublished data from another UK community cohort recruited during the COVID-19 pandemic with a similar  
15 gender profile to our own,<sup>34</sup> suggesting that these groups may be the most in need of intervention. They are  
16 also, in part, consistent with our hypothesis that the greatest psychological morbidity would be observed in  
17 individuals at greatest risk of COVID-19. But they also clearly illustrate that for some (e.g., younger  
18 participants), the experience of psychological morbidity may be unrelated to their actual risk of COVID-19.  
19 These results may reflect the fact that the pandemic has resulted in a panoply of challenges likely to affect  
20 mental health that go beyond the disease itself. It could be hypothesised, for example, that some of the more  
21 immediate consequences such as unemployment, financial concerns and increased domestic violence would  
22 disproportionately affect younger people and women and this may explain our findings.

23  
24  
25 A fourth, and related issue, is that although being younger, female and in a recognised COVID-19 risk group  
26 were consistently associated with poorer mental health, the relationship was modest, accounting for, at best,  
27 14% of the variance. In contrast, the modifiable explanatory measures when added to the multivariable models  
28 accounted for 54-57% of the total variance, with greater perceived loneliness, worry about getting COVID-19  
29 and lower positive mood strongly associated with all three outcomes. These findings are encouraging as they  
30 suggest that there is considerable potential to develop interventions to mitigate the mental health effects of the  
31 pandemic.<sup>35</sup> But they also signal a role for public health interventions. For example, a robust and effective  
32 contact tracing system with regional level data could do much to allay people's worries about contracting the  
33 infection and also increase social participation which, in turn, would benefit perceived loneliness. Clear and  
34 consistent public health messaging regarding the use of face masks to reduce infection risk could be another  
35 effective strategy. Viewed this way, these public health interventions could simultaneously reduce the risk of  
36 COVID-19 infection as well as help to manage some of the concomitant psychological distress. There is, of  
37  
38  
39  
40  
41  
42  
43  
44  
45  
46  
47  
48  
49  
50  
51  
52  
53  
54  
55  
56  
57  
58  
59  
60

1  
2  
3 course, still likely to be increased demand for mental health services in response to the pandemic. However, our  
4 data suggest that public health control measures commonly used in response to epidemics and pandemics may  
5 also have a role to play.  
6  
7

8  
9 A final issue concerns the effects of the pandemic beyond mental health. It is well known that when negative  
10 mood states persist over time they result in the dysregulation of physiological systems involved in the regulation  
11 of the immune system.<sup>36</sup> Thus, there exists significant potential for the psychological harm inflicted by the  
12 pandemic to translate into physical harm. This could include an increased susceptibility to the virus, worse  
13 outcomes if infected, or indeed poorer responses to vaccinations in the future.<sup>36</sup> Studies providing longitudinal  
14 data on the prevalence of psychological morbidity and appropriate biomarkers (e.g., cortisol) will be required to  
15 determine whether the risks to physical health go beyond the hypothetical.  
16  
17

18  
19 In conclusion, we are among the first to provide evidence from a large cohort on the mental health impact of the  
20 COVID-19 pandemic on people in the UK. We provide early evidence that women, young people and  
21 individuals in recognised COVID-19 risk groups may be at particular risk. However, the strongest associations  
22 were with psychological characteristics such as worry about contracting COVID-19 and perceived loneliness.  
23  
24 These findings, we suggest, indicate that robust public health measures, such as effective contact tracing, which  
25 reduce the public's concerns regarding risk of infection, could do much to ameliorate mental health difficulties.  
26  
27  
28  
29  
30  
31  
32  
33  
34  
35  
36  
37  
38  
39  
40  
41  
42  
43  
44  
45  
46  
47  
48  
49  
50  
51  
52  
53  
54  
55  
56  
57  
58  
59  
60

### Contributor statements

**Ru Jia:** study design, coordination and management of recruitment, preparation, analysis and interpretation of data, preparation and review of final manuscript.

**Kieran Ayling:** study design, coordination and management of recruitment, preparation, analysis and interpretation of data preparation and review of final manuscript.

**Trudie Chalder:** study design, analysis and interpretation of data preparation and review of final manuscript.

**Adam Massey:** study design, coordination and management of recruitment, preparation, analysis and interpretation of data and review of final manuscript.

**Elizabeth Broadbent:** study design, interpretation of data and review of final manuscript

**Carol Coupland:** study design, analysis and interpretation of data, preparation and review of final manuscript

**Kavita Vedhara:** research lead and overall guarantor for the article contributing to study design, coordination and management of recruitment, preparation, analysis and interpretation of data and preparation of manuscript.

As corresponding author, KV had access to all the data in the study and had final responsibility for the decision to submit for publication.

**PPI:** We would like to acknowledge the valuable contributions of our PPI group in supporting the design of our recruitment strategy, contents of the survey and the communication of findings to study participants.

### No competing interests

All authors have completed the ICMJE uniform disclosure form at [www.icmje.org/coi\\_disclosure.pdf](http://www.icmje.org/coi_disclosure.pdf) and declare: no support from any organisation for the submitted work; no financial relationships with any organisations that might have an interest in the submitted work in the previous three years; no other relationships or activities that could appear to have influenced the submitted work.

### Funding

KA was supported by funding from the National Institute for Health Research School for Primary Care Research (NIHR SPCR). The views expressed are those of the author(s) and not necessarily those of the NIHR, the NHS or the Department of Health.

TC acknowledges the financial support of the Department of Health via the National Institute for Health Research (NIHR) Specialist Biomedical Research Centre for Mental Health award to the South London and Maudsley NHS Foundation Trust (SLaM) and the Institute of Psychiatry at King's College London. The views

1  
2  
3 expressed are those of the authors and not necessarily those of the NHS, the NIHR or the Department of Health  
4 and Social Care. No other funding supported the work described in this manuscript.  
5  
6  
7

#### 8 9 **Transparency declaration**

10 The lead author affirms that this manuscript is an honest, accurate, and transparent account of the study being  
11 reported; that no important aspects of the study have been omitted; and that any discrepancies from the study as  
12 planned have been explained.  
13  
14  
15

#### 16 17 18 **Data sharing**

19 Data will be deposited in the University of Nottingham data archive. Access to this dataset will be embargoed  
20 for a period of 12 months to permit planned analyses of the dataset. After that it may be shared with the consent  
21 of the Chief Investigator. Extra data is available by contacting [kavita.vedhara@nottingham.ac.uk](mailto:kavita.vedhara@nottingham.ac.uk).  
22  
23  
24  
25

#### 26 27 28 **Dissemination statement**

29 We plan to disseminate results to study participants  
30  
31  
32  
33  
34  
35  
36  
37  
38  
39  
40  
41  
42  
43  
44  
45  
46  
47  
48  
49  
50  
51  
52  
53  
54  
55  
56  
57  
58  
59  
60

## References

1. Holmes EA, O'Connor RC, Perry VH, et al. Multidisciplinary research priorities for the COVID-19 pandemic: a call for action for mental health science. *The lancet Psychiatry* 2020;7(6):547-60. doi: 10.1016/s2215-0366(20)30168-1 [published Online First: 2020/04/19]
2. Candan SA, Elibol N, Abdullahi A. Consideration of prevention and management of long-term consequences of post-acute respiratory distress syndrome in patients with COVID-19. *Physiotherapy Theory and Practice* 2020;36(6):663-68. doi: 10.1080/09593985.2020.1766181
3. Liu S, Yang L, Zhang C, et al. Online mental health services in China during the COVID-19 outbreak. *The lancet Psychiatry* 2020;7(4):e17-e18. doi: 10.1016/s2215-0366(20)30077-8 [published Online First: 2020/02/23]
4. Tian F, Li H, Tian S, et al. Psychological symptoms of ordinary Chinese citizens based on SCL-90 during the level I emergency response to COVID-19. *Psychiatry research* 2020;288:112992. doi: 10.1016/j.psychres.2020.112992 [published Online First: 2020/04/18]
5. Jeong H, Yim HW, Song Y-J, et al. Mental health status of people isolated due to Middle East Respiratory Syndrome. *Epidemiol Health* 2016;38:e2016048-e48. doi: 10.4178/epih.e2016048
6. Chan SM, Chiu FK, Lam CW, et al. Elderly suicide and the 2003 SARS epidemic in Hong Kong. *International journal of geriatric psychiatry* 2006;21(2):113-8. doi: 10.1002/gps.1432 [published Online First: 2006/01/18]
7. Williams SN, Armitage CJ, Tampe T, et al. Public perceptions and experiences of social distancing and social isolation during the COVID-19 pandemic: a UK-based focus group study. *BMJ Open* 2020;10(7):e039334. doi: 10.1136/bmjopen-2020-039334
8. <https://www.ons.gov.uk/peoplepopulationandcommunity/healthandsocialcare/causesofdeath/bulletins/coronaviruscovid19relateddeathsbyoccupationenglandandwales/deathsregistereduptoandincluding20april2020> [accessed 11/05/20].
9. Zhou F, Yu T, Du R, et al. Clinical course and risk factors for mortality of adult inpatients with COVID-19 in Wuhan, China: a retrospective cohort study; [published correction appears in *Lancet*. 2020 Mar 28;395(10229):1038]. *The Lancet* 2020;395(10229):p1054-62.



- 1  
2  
3 10. Khunti K, Singh AK, Pareek M, et al. Is ethnicity linked to incidence or outcomes of covid-19? *BMJ*  
4 2020;369:m1548. doi: 10.1136/bmj.m1548  
5  
6  
7 11. Folkman S. Positive psychological states and coping with severe stress. *Social science & medicine (1982)*  
8 1997;45(8):1207-21. doi: 10.1016/s0277-9536(97)00040-3 [published Online First: 1997/09/25]  
9  
10  
11 12. Bults M, Beaujean DJ, de Zwart O, et al. Perceived risk, anxiety, and behavioural responses of the general  
12 public during the early phase of the Influenza A (H1N1) pandemic in the Netherlands: results of three  
13 consecutive online surveys. *BMC public health* 2011;11:2. doi: 10.1186/1471-2458-11-2 [published Online  
14 First: 2011/01/05]  
15  
16  
17 13. Salkovskis PM, Rimes KA, Warwick HM, et al. The Health Anxiety Inventory: development and validation  
18 of scales for the measurement of health anxiety and hypochondriasis. *Psychological medicine* 2002;32(5):843-  
19 53. doi: 10.1017/s0033291702005822 [published Online First: 2002/08/13]  
20  
21  
22 14. Gao J, Zheng P, Jia Y, et al. Mental health problems and social media exposure during COVID-19 outbreak.  
23 *PLoS One* 2020;15(4):e0231924-e24. doi: 10.1371/journal.pone.0231924  
24  
25  
26 15. Wang J, Mann F, Lloyd-Evans B, et al. Associations between loneliness and perceived social support and  
27 outcomes of mental health problems: a systematic review. *BMC psychiatry* 2018;18(1):156. doi:  
28 10.1186/s12888-018-1736-5 [published Online First: 2018/05/31]  
29  
30  
31 16. Leigh-Hunt N, Bagguley D, Bash K, et al. An overview of systematic reviews on the public health  
32 consequences of social isolation and loneliness. *Public health* 2017;152:157-71. doi:  
33 10.1016/j.puhe.2017.07.035 [published Online First: 2017/09/16]  
34  
35  
36 17. Pressman SD, Jenkins BN, Moskowitz JT. Positive Affect and Health: What Do We Know and Where Next  
37 Should We Go? *Annual review of psychology* 2019;70:627-50. doi: 10.1146/annurev-psych-010418-102955  
38 [published Online First: 2018/09/28]  
39  
40  
41 18. Larsen JT, Hershfield HE, Stastny BJ, et al. On the relationship between positive and negative affect: Their  
42 correlation and their co-occurrence. *Emotion (Washington, DC)* 2017;17(2):323-36. doi: 10.1037/emo0000231  
43 [published Online First: 2016/10/28]  
44  
45  
46 19. Dejonckheere E, Mestdagh M, Verdonck S, et al. The relation between positive and negative affect becomes  
47 more negative in response to personally relevant events. *Emotion (Washington, DC)* 2019 doi:  
48 10.1037/emo0000697 [published Online First: 2019/11/08]  
49  
50  
51  
52  
53  
54  
55  
56  
57  
58  
59  
60

- 1  
2  
3 20. Schotanus-Dijkstra M, Ten Have M, Lamers SMA, et al. The longitudinal relationship between flourishing  
4 mental health and incident mood, anxiety and substance use disorders. *Eur J Public Health* 2017;27(3):563-68.  
5  
6 doi: 10.1093/eurpub/ckw202  
7  
8  
9 21. Schotanus-Dijkstra M, Keyes CLM, de Graaf R, et al. Recovery from mood and anxiety disorders: The  
10 influence of positive mental health. *Journal of affective disorders* 2019;252:107-13. doi:  
11  
12 10.1016/j.jad.2019.04.051 [published Online First: 2019/04/14]  
13  
14 22. Kroenke K, Spitzer RL, Williams JB, et al. The Patient Health Questionnaire Somatic, Anxiety, and  
15 Depressive Symptom Scales: a systematic review. *General hospital psychiatry* 2010;32(4):345-59. doi:  
16  
17 10.1016/j.genhosppsy.2010.03.006 [published Online First: 2010/07/17]  
18  
19 23. Spitzer RL, Kroenke K, Williams JB, et al. A brief measure for assessing generalized anxiety disorder: the  
20 GAD-7. *Archives of internal medicine* 2006;166(10):1092-7. doi: 10.1001/archinte.166.10.1092 [published  
21  
22 Online First: 2006/05/24]  
23  
24 24. Cohen S. Perceived stress in a probability sample of the United States. *The social psychology of health*.  
25  
26 Thousand Oaks, CA, US: Sage Publications, Inc 1988:31-67.  
27  
28 25. Diener E, Wirtz D, Tov W, et al. New Well-being Measures: Short Scales to Assess Flourishing and Positive  
29 and Negative Feelings. *Social Indicators Research* 2010;97:143-56.  
30  
31 26. Lumley T, Diehr P, Emerson S, et al. The Importance of the Normality Assumption in Large Public Health  
32 Data Sets. *Annual Review of Public Health* 2002;23(1):151-69. doi:  
33  
34 10.1146/annurev.publhealth.23.100901.140546  
35  
36 27. Kocalevent RD, Hinz A, Brähler E. Standardization of the depression screener patient health questionnaire  
37 (PHQ-9) in the general population. *General hospital psychiatry* 2013;35(5):551-5. doi:  
38  
39 10.1016/j.genhosppsy.2013.04.006 [published Online First: 2013/05/15]  
40  
41 28. Warttig SL, Forshaw MJ, South J, et al. New, normative, English-sample data for the Short Form Perceived  
42 Stress Scale (PSS-4). *Journal of health psychology* 2013;18(12):1617-28. doi: 10.1177/1359105313508346  
43  
44 [published Online First: 2013/10/25]  
45  
46 29. Löwe B, Decker O, Müller S, et al. Validation and standardization of the Generalized Anxiety Disorder  
47 Screener (GAD-7) in the general population. *Medical care* 2008;46(3):266-74. doi:  
48  
49 10.1097/MLR.0b013e318160d093 [published Online First: 2008/04/05]  
50  
51  
52  
53  
54  
55  
56  
57  
58  
59  
60

- 1  
2  
3 30. Owen JE, Bantum EOC, Criswell K, et al. Representativeness of two sampling procedures for an internet  
4 intervention targeting cancer-related distress: a comparison of convenience and registry samples. *J Behav Med*  
5 2014;37(4):630-41. doi: 10.1007/s10865-013-9509-6 [published Online First: 2013/05/04]  
6  
7  
8  
9 31. [https://files.digital.nhs.uk/pdf/q/3/mental\\_health\\_and\\_wellbeing\\_in\\_england\\_full\\_report.pdf](https://files.digital.nhs.uk/pdf/q/3/mental_health_and_wellbeing_in_england_full_report.pdf) [accessed  
10 03/05/20].  
11  
12 32. Hidaka BH. Depression as a disease of modernity: explanations for increasing prevalence. *Journal of*  
13 *affective disorders* 2012;140(3):205-14. doi: 10.1016/j.jad.2011.12.036 [published Online First: 2012/01/12]  
14  
15 33. Chabaud F, Benradia I, Bouet R, et al. Facteurs de risque sociodémographiques et troubles mentaux :  
16 modèle global et spécificités locales, d'après les résultats de l'enquête « santé mentale en population générale »  
17 dans 18 sites internationaux. *L'Encéphale* 2017;43(6):540-57. doi: <https://doi.org/10.1016/j.encep.2016.04.009>  
18  
19  
20  
21 34. <https://www.marchnetwork.org/research> [accessed 04/05/20].  
22  
23  
24 35. Masi CM, Chen H-Y, Hawkley LC, et al. A meta-analysis of interventions to reduce loneliness. *Pers Soc*  
25 *Psychol Rev* 2011;15(3):219-66. doi: 10.1177/1088868310377394 [published Online First: 2010/08/17]  
26  
27  
28 36. <https://thepsychologist.bps.org.uk/we-will-have-live-risk-covid-19-psychology-has-much-say-about-risk>  
29 [accessed 06/05/2020].  
30  
31  
32  
33  
34  
35  
36  
37  
38  
39  
40  
41  
42  
43  
44  
45  
46  
47  
48  
49  
50  
51  
52  
53  
54  
55  
56  
57  
58  
59  
60

## Supplementary Appendices

**Appendix 1: Results from univariable regressions**

**Appendix 2: Multivariable regression models, excluding perceived risk of COVID-19**

**Appendix 3: Details of characteristics and measures**

**Appendix 4: Means for depression, anxiety and stress with overall means weighted to mid-2019 UK population distribution**

### Appendix 1: Results from univariable regressions

#### 1.1 Depression (PHQ-9)

**Table S1: Univariable regression coefficients for non-modifiable factors as predictors of depression scores**

| <b>PHQ-9 Total Score (Square-Root Transformed)</b> | <b>Coefficient (Standard Error)</b> |
|----------------------------------------------------|-------------------------------------|-------------------------------------|-------------------------------------|-------------------------------------|-------------------------------------|-------------------------------------|
| Age (per decade)                                   | -0.27****<br>(0.01)                 |                                     |                                     |                                     |                                     |                                     |
| Female                                             |                                     | 0.37****<br>(0.06)                  |                                     |                                     |                                     |                                     |
| Live alone                                         |                                     |                                     | 0.14*<br>(0.06)                     |                                     |                                     |                                     |
| BAME background                                    |                                     |                                     |                                     | 0.23**<br>(0.07)                    |                                     |                                     |
| Key-worker                                         |                                     |                                     |                                     |                                     | 0.12**<br>(0.04)                    |                                     |
| Risk Group <sup>a</sup><br>Most at Risk            |                                     |                                     |                                     |                                     |                                     | 0.46****<br>(0.11)                  |
| Increased Risk                                     |                                     |                                     |                                     |                                     |                                     | 0.00<br>(0.02)                      |
| Constant                                           | 3.68****<br>(0.06)                  | 2.18****<br>(0.06)                  | 2.47****<br>(0.02)                  | 2.47****<br>(0.02)                  | 2.43****<br>(0.03)                  | 2.47****<br>(0.02)                  |

\*\*\*\*  $p < 0.0001$ , \*\*\*  $p < 0.001$ , \*\*  $p < 0.01$ , \*  $p < 0.05$

<sup>a</sup> Comparison reference group "I am in neither risk category".

**Table S2: Univariable regression coefficients for modifiable factors as predictors of depression scores**

| PHQ-9 Total Score (Square-Root Transformed) | Coefficient (Standard Error) | Coefficient (Standard Error) | Coefficient (Standard Error) | Coefficient (Standard Error) |
|---------------------------------------------|------------------------------|------------------------------|------------------------------|------------------------------|
| Perceived loneliness                        | 0.25****<br>(0.01)           |                              |                              |                              |
| Positive mood                               |                              | -0.16****<br>(0.00)          |                              |                              |
| COVID-19 worry <sup>a</sup>                 |                              |                              |                              |                              |
| No worry                                    |                              |                              | 0.00<br>(0.06)               |                              |
| Much of time                                |                              |                              | 0.83****<br>(0.06)           |                              |
| Most of time                                |                              |                              | 1.33****<br>(0.11)           |                              |
| Perceived risk of COVID-19                  |                              |                              |                              | 0.08****<br>(0.01)           |
| Constant                                    | 1.55****<br>(0.03)           | 5.53****<br>(0.06)           | 2.33****<br>(0.03)           | 2.03****<br>(0.06)           |

\*\*\*\*  $p < 0.0001$ , \*\*\*  $p < 0.001$ , \*\*  $p < 0.01$ , \*  $p < 0.05$

<sup>a</sup> Comparison reference group "I occasionally worry about getting COVID-19"

**Table S3: Univariable logistic regression coefficients for non-modifiable factors as predictors of depression cases<sup>a</sup>**

| PHQ-9 "Cases"           | Odds Ratio [95% CI]      |
|-------------------------|--------------------------|--------------------------|--------------------------|--------------------------|--------------------------|--------------------------|
| Age (per decade)        | 0.68****<br>[0.65, 0.72] |                          |                          |                          |                          |                          |
| Female                  |                          | 1.43**<br>[1.14, 1.78]   |                          |                          |                          |                          |
| Live alone              |                          |                          | 1.15<br>[0.92, 1.43]     |                          |                          |                          |
| BAME background         |                          |                          |                          | 1.49**<br>[1.17, 1.91]   |                          |                          |
| Key-worker              |                          |                          |                          |                          | 1.16<br>[1.00, 1.35]     |                          |
| Risk Group <sup>b</sup> |                          |                          |                          |                          |                          |                          |
| Most at Risk            |                          |                          |                          |                          |                          | 1.59<br>[1.10, 2.31]     |
| Increased Risk          |                          |                          |                          |                          |                          | 1.14<br>[0.93, 1.39]     |
| Constant                | 2.37****<br>[1.86, 3.03] | 0.34****<br>[0.28, 0.42] | 0.45****<br>[0.42, 0.49] | 0.44****<br>[0.41, 0.48] | 0.43****<br>[0.38, 0.48] | 0.44****<br>[0.41, 0.48] |

\*\*\*\*  $p < 0.0001$ , \*\*\*  $p < 0.001$ , \*\*  $p < 0.01$ , \*  $p < 0.05$

<sup>a</sup> a "case" is defined as a PHQ-9 score greater than or equal to 10, at which level someone would qualify for high intensity psychological support in the NHS

<sup>b</sup> Comparison reference group "I am in neither risk category".

**Table S4: Univariable logistic regression coefficients for modifiable factors as predictors of depression cases<sup>a</sup>**

| PHQ-9 “Cases”               | Odds Ratio<br>[95% CI]   | Odds Ratio<br>[95% CI]        | Odds Ratio<br>[95% CI]    | Odds Ratio<br>[95% CI]   |
|-----------------------------|--------------------------|-------------------------------|---------------------------|--------------------------|
| Perceived loneliness        | 1.46****<br>[1.42, 1.51] |                               |                           |                          |
| Positive mood               |                          | 0.72****<br>[0.70, 0.74]      |                           |                          |
| COVID-19 worry <sup>b</sup> |                          |                               |                           |                          |
| No worry                    |                          |                               | 1.04<br>[0.84, 1.29]      |                          |
| Much of time                |                          |                               | 2.97****<br>[2.39, 3.69]  |                          |
| Most of time                |                          |                               | 8.27****<br>[5.44, 12.58] |                          |
| Perceived risk of COVID-19  |                          |                               |                           | 1.12****<br>[1.08, 1.16] |
| Constant                    | 0.09****<br>[0.08, 0.11] | 156.94****<br>[99.53, 247.47] | 0.35****<br>[0.32, 0.39]  | 0.24****<br>[0.20, 0.30] |

\*\*\*\*  $p < 0.0001$ , \*\*\*  $p < 0.001$ , \*\*  $p < 0.01$ , \*  $p < 0.05$

<sup>a</sup> a “case” is defined as a PHQ-9 score greater than or equal to 10, at which level someone would qualify for high intensity psychological support in the NHS

<sup>b</sup> Comparison reference group “I occasionally worry about getting COVID-19”

## 1.2 Anxiety (GAD-7)

**Table S5: Univariable regression coefficients for non-modifiable factors as predictors of anxiety scores**

| GAD-7 Total Score (Square-Root Transformed) | Coefficient (Standard Error) |
|---------------------------------------------|------------------------------|------------------------------|------------------------------|------------------------------|------------------------------|------------------------------|
| Age (per decade)                            | -0.24****<br>(0.01)          |                              |                              |                              |                              |                              |
| Female                                      |                              | 0.45****<br>(0.06)           |                              |                              |                              |                              |
| Live alone                                  |                              |                              | -0.21**<br>(0.07)            |                              |                              |                              |
| BAME background                             |                              |                              |                              | 0.17*<br>(0.08)              |                              |                              |
| Key-worker                                  |                              |                              |                              |                              | 0.15***<br>(0.04)            |                              |
| Risk Group <sup>a</sup><br>Most at Risk     |                              |                              |                              |                              |                              | 0.30**<br>(0.11)             |
| Increased Risk                              |                              |                              |                              |                              |                              | -0.04<br>(0.06)              |
| Constant                                    | 3.34****<br>(0.07)           | 1.87****<br>(0.06)           | 2.28****<br>(0.02)           | 2.23****<br>(0.02)           | 2.17****<br>(0.03)           | 2.25****<br>(0.02)           |

\*\*\*\*  $p < 0.0001$ , \*\*\*  $p < 0.001$ , \*\*  $p < 0.01$ , \*  $p < 0.05$

<sup>a</sup> Comparison reference group "I am in neither risk category".

**Table S6: Univariable regression coefficients for modifiable factors as predictors of anxiety scores**

| GAD-7 Total Score (Square-Root Transformed) | Coefficient (Standard Error) | Coefficient (Standard Error) | Coefficient (Standard Error) | Coefficient (Standard Error) |
|---------------------------------------------|------------------------------|------------------------------|------------------------------|------------------------------|
| Perceived loneliness                        | 0.21****<br>(0.01)           |                              |                              |                              |
| Positive mood                               |                              | -0.16****<br>(0.00)          |                              |                              |
| COVID-19 worry <sup>a</sup><br>No worry     |                              |                              | -0.22****<br>(0.06)          |                              |
| Much of time                                |                              |                              | 1.06****<br>(0.06)           |                              |
| Most of time                                |                              |                              | 1.75****<br>(0.11)           |                              |
| Perceived risk of COVID-19                  |                              |                              |                              | 0.12****<br>(0.01)           |
| Constant                                    | 1.45****<br>(0.03)           | 5.20****<br>(0.07)           | 2.08****<br>(0.02)           | 1.62****<br>(0.06)           |

\*\*\*\*  $p < 0.0001$ , \*\*\*  $p < 0.001$ , \*\*  $p < 0.01$ , \*  $p < 0.05$

<sup>a</sup> Comparison reference group "I occasionally worry about getting COVID-19"

**Table S7: Univariable logistic regression coefficients for non-modifiable factors as predictors of anxiety cases<sup>a</sup>**

| GAD-7 “Cases”           | Odds Ratio<br>[95% CI]   |
|-------------------------|--------------------------|--------------------------|--------------------------|--------------------------|--------------------------|--------------------------|
| Age (per decade)        | 0.70****<br>[0.66, 0.75] |                          |                          |                          |                          |                          |
| Female                  |                          | 1.56***<br>[1.22, 1.99]  |                          |                          |                          |                          |
| Live alone              |                          |                          | 0.80<br>[0.62, 1.02]     |                          |                          |                          |
| BAME background         |                          |                          |                          | 1.44**<br>[1.11, 1.86]   |                          |                          |
| Key-worker              |                          |                          |                          |                          | 1.16<br>[0.99, 1.36]     |                          |
| Risk Group <sup>b</sup> |                          |                          |                          |                          |                          |                          |
| Most at Risk            |                          |                          |                          |                          |                          | 1.47<br>[0.997, 2.16]    |
| Increased Risk          |                          |                          |                          |                          |                          | 0.96<br>[0.77, 1.19]     |
| Constant                | 1.58***<br>[1.23, 2.04]  | 0.24****<br>[0.19, 0.30] | 0.36****<br>[0.33, 0.39] | 0.34****<br>[0.31, 0.37] | 0.33****<br>[0.29, 0.37] | 0.35****<br>[0.32, 0.38] |

\*\*\*\*  $p < 0.0001$ , \*\*\*  $p < 0.001$ , \*\*  $p < 0.01$ , \*  $p < 0.05$

<sup>a</sup> a “case” is defined as a GAD-7 score greater than or equal to 10, at which level someone would qualify for high intensity psychological support in the NHS

<sup>b</sup> Comparison reference group “I am in neither risk category”.

**Table S8: Univariable logistic regression coefficients for modifiable factors as predictors of anxiety cases<sup>a</sup>**

| GAD-7 “Cases”               | Odds Ratio<br>[95% CI]   | Odds Ratio<br>[95% CI]       | Odds Ratio<br>[95% CI]      | Odds Ratio<br>[95% CI]   |
|-----------------------------|--------------------------|------------------------------|-----------------------------|--------------------------|
| Perceived loneliness        | 1.37****<br>[1.32, 1.41] |                              |                             |                          |
| Positive mood               |                          | 0.74****<br>[0.72, 0.76]     |                             |                          |
| COVID-19 worry <sup>b</sup> |                          |                              |                             |                          |
| No worry                    |                          |                              | 0.93<br>[0.72, 1.19]        |                          |
| Much of time                |                          |                              | 5.03****<br>[4.02, 6.28]    |                          |
| Most of time                |                          |                              | 24.75****<br>[14.83, 41.31] |                          |
| Perceived risk of COVID-19  |                          |                              |                             | 1.18****<br>[1.14, 1.23] |
| Constant                    | 0.09****<br>[0.08, 0.11] | 70.16****<br>[45.39, 108.44] | 0.23****<br>[0.21, 0.26]    | 0.14****<br>[0.11, 0.18] |

\*\*\*\*  $p < 0.0001$ , \*\*\*  $p < 0.001$ , \*\*  $p < 0.01$ , \*  $p < 0.05$

<sup>a</sup> a “case” is defined as a GAD-7 score greater than or equal to 10, at which level someone would qualify for high intensity psychological support in the NHS

<sup>b</sup> Comparison reference group “I occasionally worry about getting COVID-19”



### 1.3 Stress (PSS-4)

**Table S9: Univariable regression coefficients for non-modifiable factors as predictors of stress scores**

| PSS-4 Total Score                       | Coefficient<br>(Standard Error) |
|-----------------------------------------|---------------------------------|---------------------------------|---------------------------------|---------------------------------|---------------------------------|---------------------------------|
| Age (per decade)                        | -0.52****<br>(0.04)             |                                 |                                 |                                 |                                 |                                 |
| Female                                  |                                 | 0.71****<br>(0.16)              |                                 |                                 |                                 |                                 |
| Live alone                              |                                 |                                 | 0.13<br>(0.17)                  |                                 |                                 |                                 |
| BAME background                         |                                 |                                 |                                 | 0.84****<br>(0.20)              |                                 |                                 |
| Key-worker                              |                                 |                                 |                                 |                                 | -0.11<br>(0.12)                 |                                 |
| Risk Group <sup>a</sup><br>Most at Risk |                                 |                                 |                                 |                                 |                                 | 0.97***<br>(0.30)               |
| Increased Risk                          |                                 |                                 |                                 |                                 |                                 | -0.09<br>(0.16)                 |
| Constant                                | 8.84****<br>(0.18)              | 5.88****<br>(0.15)              | 6.46****<br>(0.06)              | 6.40****<br>(0.06)              | 6.53****<br>(0.08)              | 6.45****<br>(0.07)              |

\*\*\*\*  $p < 0.0001$ , \*\*\*  $p < 0.001$ , \*\*  $p < 0.01$ , \*  $p < 0.05$

<sup>a</sup> Comparison reference group "I am in neither risk category".

**Table S10: Univariable regression coefficients for modifiable factors as predictors of stress scores**

| PSS-4 Total Score                       | Coefficient<br>(Standard Error) | Coefficient<br>(Standard Error) | Coefficient<br>(Standard Error) | Coefficient<br>(Standard Error) |
|-----------------------------------------|---------------------------------|---------------------------------|---------------------------------|---------------------------------|
| Perceived loneliness                    | 0.62****<br>(0.02)              |                                 |                                 |                                 |
| Positive mood                           |                                 | -0.46****<br>(0.01)             |                                 |                                 |
| COVID-19 worry <sup>a</sup><br>No worry |                                 |                                 | -0.14<br>(0.15)                 |                                 |
| Much of time                            |                                 |                                 | 1.90****<br>(0.17)              |                                 |
| Most of time                            |                                 |                                 | 3.78****<br>(0.29)              |                                 |
| Perceived risk of COVID-19              |                                 |                                 |                                 | 0.22****<br>(0.03)              |
| Constant                                | 4.09****<br>(0.09)              | 15.28****<br>(0.16)             | 6.10****<br>(0.07)              | 5.31****<br>(0.15)              |

\*\*\*\*  $p < 0.0001$ , \*\*\*  $p < 0.001$ , \*\*  $p < 0.01$ , \*  $p < 0.05$

<sup>a</sup> Comparison reference group "I occasionally worry about getting COVID-19"

Appendix 2: Multivariable regression models, excluding perceived risk of COVID-19

Table S11: Regression model showing associations between modifiable explanatory variables and depression scores (excluding perceived risk of COVID-19)

|                                              | B     | 95% CI Lower | 95% CI Upper | $\beta$ | p          |
|----------------------------------------------|-------|--------------|--------------|---------|------------|
| <b>PHQ-9 Total Score<sup>a</sup></b>         |       |              |              |         |            |
| Age (per decade)                             | -0.18 | -0.20        | -0.16        | -0.22   | <.0001**** |
| Female                                       | 0.20  | 0.11         | 0.28         | 0.06    | <.0001**** |
| Live alone                                   | -0.00 | -0.10        | 0.09         | -0.00   | 0.92       |
| BAME background                              | -0.06 | -0.16        | 0.04         | -0.01   | 0.26       |
| Key-worker                                   | 0.07  | 0.01         | 0.12         | 0.03    | 0.03*      |
| Risk Group <sup>b</sup>                      |       |              |              |         |            |
| Most at Risk                                 | 0.20  | 0.05         | 0.35         | 0.03    | 0.01**     |
| Increased Risk                               | 0.15  | 0.07         | 0.23         | 0.05    | <.001***   |
| Perceived loneliness                         | 0.10  | 0.08         | 0.11         | 0.22    | <.0001**** |
| Positive mood                                | -0.12 | -0.13        | -0.11        | -0.50   | <.0001**** |
| COVID-19 worry <sup>c</sup>                  |       |              |              |         |            |
| No worry                                     | 0.03  | -0.05        | 0.11         | 0.01    | 0.45       |
| Much of time                                 | 0.26  | 0.18         | 0.35         | 0.07    | <.0001**** |
| Most of time                                 | 0.34  | 0.19         | 0.50         | 0.05    | <.0001**** |
| <b>Adj R<sup>2</sup>=.56, p&lt;.0001****</b> |       |              |              |         |            |

\*\*\*\* p<0.0001, \*\*\* p<0.001, \*\* p<0.01, \* p<0.05

<sup>a</sup> A square-root transformation was applied to the dependent variable

<sup>b</sup> Comparison reference group “I am in neither risk category”.

<sup>c</sup> Comparison reference group “I occasionally worry about getting COVID-19”

Table S12: Logistic regression model showing associations between modifiable explanatory variables and depression cases (excluding perceived risk of COVID-19)

|                                          | Odds Ratio | 95% CI Lower | 95% CI Upper | $\beta$ | p          |
|------------------------------------------|------------|--------------|--------------|---------|------------|
| <b>PHQ-9 “Cases”<sup>a</sup></b>         |            |              |              |         |            |
| Age (per decade)                         | 0.68       | 0.63         | 0.73         | -1.24   | <.0001**** |
| Female                                   | 1.20       | 0.90         | 1.60         | 0.14    | 0.21       |
| Live alone                               | 0.84       | 0.61         | 1.15         | -0.13   | 0.28       |
| BAME background                          | 0.98       | 0.70         | 1.37         | -0.01   | 0.90       |
| Key-worker                               | 1.22       | 1.00         | 1.48         | 0.21    | 0.05       |
| Risk Group <sup>b</sup>                  |            |              |              |         |            |
| Most at Risk                             | 1.18       | 0.72         | 1.94         | 0.07    | 0.51       |
| Increased Risk                           | 1.44       | 1.10         | 1.89         | 0.30    | 0.007**    |
| Perceived loneliness                     | 1.21       | 1.16         | 1.26         | 1.12    | <.0001**** |
| Positive mood                            | 0.76       | 0.74         | 0.78         | -2.96   | <.0001**** |
| COVID-19 worry <sup>c</sup>              |            |              |              |         |            |
| No worry                                 | 0.93       | 0.70         | 1.24         | -0.06   | 0.63       |
| Much of time                             | 1.58       | 1.21         | 2.07         | 0.34    | <.001***   |
| Most of time                             | 2.65       | 1.58         | 4.43         | 0.40    | <.001***   |
| <b>Pseudo R<sup>2</sup>=0.34, n=3090</b> |            |              |              |         |            |

\*\*\*\* p<0.0001, \*\*\* p<0.001, \*\* p<0.01, \* p<0.05

<sup>a</sup> a “case” is defined as a PHQ-9 score greater than or equal to 10, at which level someone would qualify for high intensity psychological support in the NHS

<sup>b</sup> Comparison reference group “I am in neither risk category”.

<sup>c</sup> Comparison reference group “I occasionally worry about getting COVID-19”

**Table S13: Regression model showing associations between modifiable explanatory variables and anxiety scores (excluding perceived risk of COVID-19)**

|                                      | B     | 95% CI Lower | 95% CI Upper | $\beta$ | p          |
|--------------------------------------|-------|--------------|--------------|---------|------------|
| <b>GAD-7 Total Score<sup>a</sup></b> |       |              |              |         |            |
| Age (per decade)                     | -0.16 | -0.19        | -0.14        | -0.20   | <.0001**** |
| Female                               | 0.25  | 0.16         | 0.33         | 0.07    | <.0001**** |
| Live alone                           | -0.27 | -0.36        | -0.17        | -0.07   | <.0001**** |
| BAME background                      | -0.08 | -0.18        | 0.03         | -0.02   | 0.14       |
| Key-worker                           | 0.04  | -0.02        | 0.10         | 0.02    | 0.17       |
| Risk Group <sup>b</sup>              |       |              |              |         |            |
| Most at Risk                         | 0.01  | -0.15        | 0.17         | 0.00    | 0.92       |
| Increased Risk                       | 0.06  | -0.02        | 0.15         | 0.02    | 0.13       |
| Perceived loneliness                 | 0.06  | 0.05         | 0.07         | 0.13    | <.0001**** |
| Positive mood                        | -0.12 | -0.12        | -0.11        | -0.48   | <.0001**** |
| COVID-19 worry <sup>c</sup>          |       |              |              |         |            |
| No worry                             | -0.19 | -0.27        | -0.11        | -0.06   | <.0001**** |
| Much of time                         | 0.57  | 0.48         | 0.66         | 0.16    | <.0001**** |
| Most of time                         | 0.87  | 0.71         | 1.03         | 0.14    | <.0001**** |
| <b>Adj R<sup>2</sup>=.53, n=3090</b> |       |              |              |         |            |

\*\*\*\*  $p < 0.0001$ , \*\*\*  $p < 0.001$ , \*\*  $p < 0.01$ , \*  $p < 0.05$

<sup>a</sup> A square-root transformation was applied to the dependent variable

<sup>b</sup> Comparison reference group "I am in neither risk category".

<sup>c</sup> Comparison reference group "I occasionally worry about getting COVID-19"

**Table S14: Logistic regression model showing associations between modifiable explanatory variables and anxiety cases (excluding perceived risk of COVID-19)**

|                                          | Odds Ratio | 95% CI Lower | 95% CI Upper | $\beta$ | p          |
|------------------------------------------|------------|--------------|--------------|---------|------------|
| <b>GAD-7 "Cases"<sup>a</sup></b>         |            |              |              |         |            |
| Age (per decade)                         | 0.69       | 0.64         | 0.75         | -1.25   | <.0001**** |
| Female                                   | 1.23       | 0.91         | 1.67         | 0.17    | 0.18       |
| Live alone                               | 0.56       | 0.40         | 0.79         | -0.44   | <.001***   |
| BAME background                          | 0.91       | 0.65         | 1.29         | -0.06   | 0.61       |
| Key-worker                               | 1.11       | 0.90         | 1.36         | 0.11    | 0.34       |
| Risk Group <sup>b</sup>                  |            |              |              |         |            |
| Most at Risk                             | 0.88       | 0.53         | 1.47         | -0.05   | 0.63       |
| Increased Risk                           | 0.93       | 0.70         | 1.25         | -0.06   | 0.65       |
| Perceived loneliness                     | 1.13       | 1.08         | 1.18         | 0.76    | <.0001**** |
| Positive mood                            | 0.78       | 0.75         | 0.80         | -2.91   | <.0001**** |
| COVID-19 worry <sup>c</sup>              |            |              |              |         |            |
| No worry                                 | 0.72       | 0.53         | 0.98         | -0.28   | 0.04*      |
| Much of time                             | 3.59       | 2.76         | 4.68         | 0.99    | <.0001**** |
| Most of time                             | 12.54      | 6.97         | 22.56        | 1.11    | <.0001**** |
| <b>Pseudo R<sup>2</sup>=0.34, n=3090</b> |            |              |              |         |            |

\*\*\*\*  $p < 0.0001$ , \*\*\*  $p < 0.001$ , \*\*  $p < 0.01$ , \*  $p < 0.05$

<sup>a</sup> a "case" is defined as a GAD-7 score greater than or equal to 10, at which level someone would qualify for high intensity psychological support in the NHS

<sup>b</sup> Comparison reference group "I am in neither risk category".

<sup>c</sup> Comparison reference group "I occasionally worry about getting COVID-19"

**Table S15: Regression model showing associations between modifiable explanatory variables and stress scores (excluding perceived risk of COVID-19)**

|                                      | <b>B</b> | <b>95% CI Lower</b> | <b>95% CI Upper</b> | <b><math>\beta</math></b> | <b><i>p</i></b> |
|--------------------------------------|----------|---------------------|---------------------|---------------------------|-----------------|
| <b>PSS-4 Total Score</b>             |          |                     |                     |                           |                 |
| Age (per decade)                     | -0.25    | -0.30               | -0.19               | -0.11                     | <.0001****      |
| Female                               | 0.31     | 0.09                | 0.52                | 0.03                      | 0.005**         |
| Live alone                           | -0.37    | -0.61               | -0.13               | -0.04                     | 0.003**         |
| BAME background                      | 0.21     | -0.06               | 0.47                | 0.02                      | 0.13            |
| Key-worker                           | -0.24    | -0.40               | -0.09               | -0.04                     | 0.002**         |
| Risk Group <sup>a</sup>              |          |                     |                     |                           |                 |
| Most at Risk                         | 0.14     | -0.27               | 0.54                | 0.01                      | 0.50            |
| Increased Risk                       | 0.08     | -0.13               | 0.30                | 0.01                      | 0.43            |
| Perceived loneliness                 | 0.20     | 0.17                | 0.24                | 0.17                      | <.0001****      |
| Positive mood                        | -0.38    | -0.40               | -0.36               | -0.59                     | <.0001****      |
| COVID-19 worry <sup>b</sup>          |          |                     |                     |                           |                 |
| No worry                             | 0.01     | -0.21               | 0.22                | 0.00                      | 0.94            |
| Much of time                         | 0.36     | 0.12                | 0.59                | 0.04                      | 0.003**         |
| Most of time                         | 0.99     | 0.57                | 1.40                | 0.06                      | <.0001****      |
| <b>Adj R<sup>2</sup>=.56, n=3090</b> |          |                     |                     |                           |                 |

\*\*\*\*  $p < 0.0001$ , \*\*\*  $p < 0.001$ , \*\*  $p < 0.01$ , \*  $p < 0.05$

<sup>a</sup> Comparison reference group "I am in neither risk category".

<sup>b</sup> Comparison reference group "I occasionally worry about getting COVID-19"

Appendix 3: Summary of modifiable and non-modifiable explanatory factors considered in the analysis

Table S16: Explanatory factors considered in the analysis

|                               | Question/scale                                                                      | Response(s)                                                                                                                                                                                                                                                                                                                                                                                                                                                                                                                                                                                                       |
|-------------------------------|-------------------------------------------------------------------------------------|-------------------------------------------------------------------------------------------------------------------------------------------------------------------------------------------------------------------------------------------------------------------------------------------------------------------------------------------------------------------------------------------------------------------------------------------------------------------------------------------------------------------------------------------------------------------------------------------------------------------|
| <b>Non-modifiable factors</b> |                                                                                     |                                                                                                                                                                                                                                                                                                                                                                                                                                                                                                                                                                                                                   |
| Gender*                       | What was your gender at birth?                                                      | Male<br>Female<br>Other<br>Prefer not to say                                                                                                                                                                                                                                                                                                                                                                                                                                                                                                                                                                      |
| Age                           | How old are you?                                                                    | ..                                                                                                                                                                                                                                                                                                                                                                                                                                                                                                                                                                                                                |
| Ethnicity*                    | What is your ethnicity                                                              | White – British, Irish, other<br>Asian/Asian British – Indian, Pakistani, Bangladeshi, other<br>Black/Black British – Caribbean, African, other<br>Chinese/Chinese British<br>Mixed race – White and Black/Black British<br>Middle Eastern/Middle Eastern British – Arab, Turkish, other<br>Mixed race – other<br>Other ethnic group<br>Prefer not to say                                                                                                                                                                                                                                                         |
| Key-worker status             | Are you currently fulfilling any of the government’s identified ‘key worker’ roles? | Health, social care ore relevant related support worker<br>Teacher or childcare worker still travelling in to work<br>Transport worker still travelling in to work<br>Food chain worker (e.g. production, sale, delivery)<br>Key public services worker (e.g. justice staff, religious staff, public service journalist or mortuary worker)<br>Local or national government worker delivering essential public services<br>Utility worker (e.g. energy, sewerage, postal service)<br>Public safety or national security worker<br>Worker involved in medicines or protective equipment production or distribution |

|                                          |                                                                                                                                     |                                                                                    |
|------------------------------------------|-------------------------------------------------------------------------------------------------------------------------------------|------------------------------------------------------------------------------------|
|                                          |                                                                                                                                     | Other 'key worker' role not listed                                                 |
|                                          |                                                                                                                                     | None of these                                                                      |
| Living alone/with others                 | Do you live with someone?                                                                                                           | Yes                                                                                |
|                                          |                                                                                                                                     | No                                                                                 |
| Recognised risk group for COVID-19       | Which of these 3 COVID-19 risk groups do you think you are in?                                                                      | I am most at risk (e.g., suffering from advanced cancer, severe asthma/COPD, etc.) |
|                                          |                                                                                                                                     | I am at increased risk (e.g., being pregnant, aged over 70, etc.)                  |
|                                          |                                                                                                                                     | I am in neither risk category.                                                     |
| <b>Modifiable factors</b>                |                                                                                                                                     |                                                                                    |
| <i>Perceived loneliness</i> <sup>†</sup> | On a scale of 1-10, how lonely have you felt over the past 2 weeks?                                                                 | 1 (Not at all lonely) - 10 (Extremely lonely)                                      |
| <i>Perceived risk of COVID-19</i>        | On a scale of 1-10, what do you believe your risk of getting COVID-19 is?                                                           | 1 (I don't think I will get it) - 10 (I know I will most certainly get it)         |
| <i>Positive mood</i> <sup>‡</sup>        | In the past 2 weeks, I have felt Positive.                                                                                          | 1=Very rarely or never/ 2=Rarely/ 3=Sometimes/ 4=Often/ 5=Very often or always     |
|                                          | In the past 2 weeks, I have felt Good.                                                                                              | 1=Very rarely or never/ 2=Rarely/ 3=Sometimes/ 4=Often/ 5=Very often or always     |
|                                          | In the past 2 weeks, I have felt Pleasant.                                                                                          | 1=Very rarely or never/ 2=Rarely/ 3=Sometimes/ 4=Often/ 5=Very often or always     |
|                                          | In the past 2 weeks, I have felt Happy.                                                                                             | 1=Very rarely or never/ 2=Rarely/ 3=Sometimes/ 4=Often/ 5=Very often or always     |
|                                          | In the past 2 weeks, I have felt Joyful.                                                                                            | 1=Very rarely or never/ 2=Rarely/ 3=Sometimes/ 4=Often/ 5=Very often or always     |
| <i>COVID-19 worry</i>                    | In the past 2 weeks, I have felt Contented.                                                                                         | 1=Very rarely or never/ 2=Rarely/ 3=Sometimes/ 4=Often/ 5=Very often or always     |
|                                          | Please read the following statements carefully and then select the one which best describe how you have felt over the past 2 weeks. | I do not worry about getting COVID-19.                                             |
|                                          |                                                                                                                                     | I occasionally worry about getting COVID-19.                                       |
|                                          |                                                                                                                                     | I spend much of my time worrying about getting COVID-19.                           |
|                                          |                                                                                                                                     | I spend most of my time worrying about getting COVID-19.                           |

\*Gender and ethnicity were treated as binary variables in all analyses: gender (male, female), ethnicity (white British, non-white British).

<sup>†</sup> The factors in *Italic* were hypothesised to be associated with an increased risk of adverse mental health outcomes, apart from key-worker status where evidence exists that some key-worker roles are also associated with an increased risk of adverse COVID-19 outcomes. All other factors were hypothesised to be associated with an increased risk of contracting COVID-19 and/or poorer disease outcomes.

<sup>‡</sup>Positive mood was measured using the positive items from SPANE: Scale of Positive and Negative Experience ( $\alpha=0.94$ ).<sup>25</sup>

**Appendix 4: Means for depression, anxiety and stress with overall means weighted to mid-2019 UK population distribution**

**Table S17: Means for depression, anxiety and stress scores with overall means weighted to UK mid-2019 population distribution**

|                                               | Number      | Depression (PHQ-9) score | Anxiety (GAD-7) score | Stress (PSS-4) score |
|-----------------------------------------------|-------------|--------------------------|-----------------------|----------------------|
|                                               |             | Participants             | Participants          | Participants         |
|                                               |             | Mean                     | Mean                  | Mean                 |
| <b>Males</b>                                  |             |                          |                       |                      |
| <b>Age group</b>                              |             |                          |                       |                      |
| 18-19                                         | 9           | 8.11                     | 4.67                  | 5.11                 |
| 20-24                                         | 68          | 9.88                     | 7.49                  | 7.06                 |
| 25-29                                         | 42          | 8.12                     | 6.24                  | 6.55                 |
| 30-34                                         | 34          | 7.94                     | 6.82                  | 6.53                 |
| 35-39                                         | 42          | 6.40                     | 5.88                  | 5.74                 |
| 40-44                                         | 51          | 7.04                     | 5.59                  | 5.90                 |
| 45-49                                         | 37          | 7.14                     | 6.30                  | 6.46                 |
| 50-54                                         | 43          | 6.51                     | 4.56                  | 6.07                 |
| 55-59                                         | 42          | 5.64                     | 5.17                  | 6.00                 |
| 60-64                                         | 29          | 5.07                     | 4.03                  | 5.21                 |
| 65-69                                         | 40          | 2.03                     | 1.83                  | 4.05                 |
| 70-74                                         | 24          | 2.46                     | 2.08                  | 4.63                 |
| 75-79                                         | 7           | 1.71                     | 1.57                  | 3.71                 |
| 80+                                           | 8           | 3.25                     | 1.90                  | 3.55                 |
| <b>Overall<sup>1</sup></b>                    | <b>476</b>  | <b>6.08</b>              | <b>4.91</b>           | <b>5.68</b>          |
| <b>Females</b>                                |             |                          |                       |                      |
| <b>Age group</b>                              |             |                          |                       |                      |
| 18-19                                         | 35          | 9.29                     | 8.37                  | 7.57                 |
| 20-24                                         | 252         | 11.99                    | 9.68                  | 8.60                 |
| 25-29                                         | 215         | 9.13                     | 7.84                  | 7.01                 |
| 30-34                                         | 237         | 8.62                     | 8.03                  | 7.00                 |
| 35-39                                         | 266         | 9.05                     | 8.12                  | 7.20                 |
| 40-44                                         | 277         | 7.95                     | 6.94                  | 6.47                 |
| 45-49                                         | 299         | 7.91                     | 6.58                  | 6.38                 |
| 50-54                                         | 311         | 6.90                     | 6.23                  | 5.92                 |
| 55-59                                         | 298         | 6.80                     | 5.98                  | 6.20                 |
| 60-64                                         | 201         | 6.01                     | 4.88                  | 5.63                 |
| 65-69                                         | 127         | 4.68                     | 3.98                  | 5.59                 |
| 70-74                                         | 66          | 3.77                     | 3.41                  | 4.83                 |
| 75-79                                         | 24          | 4.75                     | 3.42                  | 5.42                 |
| 80+                                           | 9           | 4.00                     | 2.07                  | 6.15                 |
| <b>Overall<sup>1</sup></b>                    | <b>2617</b> | <b>7.32</b>              | <b>6.18</b>           | <b>6.36</b>          |
| <b>Overall: Males and females<sup>1</sup></b> |             | <b>6.71</b>              | <b>5.56</b>           | <b>6.03</b>          |

<sup>1</sup> Overall means weighted to mid-year population distribution of UK for 2019

## STROBE (Strengthening The Reporting of OBServational Studies in Epidemiology) Checklist

A checklist of items that should be included in reports of observational studies. You must report the page number in your manuscript where you consider each of the items listed in this checklist. If you have not included this information, either revise your manuscript accordingly before submitting or note N/A.

**Note:** An Explanation and Elaboration article discusses each checklist item and gives methodological background and published examples of transparent reporting. The STROBE checklist is best used in conjunction with this article (freely available on the Web sites of PLoS Medicine at <http://www.plosmedicine.org/>, Annals of Internal Medicine at <http://www.annals.org/>, and Epidemiology at <http://www.epidem.com/>). Information on the STROBE Initiative is available at [www.strobe-statement.org](http://www.strobe-statement.org).

| Section and Item     | Item No. | Recommendation                                                                                                                                                                                                                                                                                                                                                                                                                                                                 | Reported on Page No. |
|----------------------|----------|--------------------------------------------------------------------------------------------------------------------------------------------------------------------------------------------------------------------------------------------------------------------------------------------------------------------------------------------------------------------------------------------------------------------------------------------------------------------------------|----------------------|
| Title and Abstract   | 1        | (a) Indicate the study's design with a commonly used term in the title or the abstract                                                                                                                                                                                                                                                                                                                                                                                         |                      |
|                      |          | (b) Provide in the abstract an informative and balanced summary of what was done and what was found                                                                                                                                                                                                                                                                                                                                                                            |                      |
| <b>Introduction</b>  |          |                                                                                                                                                                                                                                                                                                                                                                                                                                                                                |                      |
| Background/Rationale | 2        | Explain the scientific background and rationale for the investigation being reported                                                                                                                                                                                                                                                                                                                                                                                           |                      |
| Objectives           | 3        | State specific objectives, including any prespecified hypotheses                                                                                                                                                                                                                                                                                                                                                                                                               |                      |
| <b>Methods</b>       |          |                                                                                                                                                                                                                                                                                                                                                                                                                                                                                |                      |
| Study Design         | 4        | Present key elements of study design early in the paper                                                                                                                                                                                                                                                                                                                                                                                                                        |                      |
| Setting              | 5        | Describe the setting, locations, and relevant dates, including periods of recruitment, exposure, follow-up, and data collection                                                                                                                                                                                                                                                                                                                                                |                      |
| Participants         | 6        | (a) <i>Cohort study</i> —Give the eligibility criteria, and the sources and methods of selection of participants. Describe methods of follow-up<br><br><i>Case-control study</i> —Give the eligibility criteria, and the sources and methods of case ascertainment and control selection. Give the rationale for the choice of cases and controls<br><br><i>Cross-sectional study</i> —Give the eligibility criteria, and the sources and methods of selection of participants |                      |
|                      |          | (b) <i>Cohort study</i> —For matched studies, give matching criteria and number of exposed and unexposed<br><br><i>Case-control study</i> —For matched studies, give matching criteria and the number of controls per case                                                                                                                                                                                                                                                     |                      |
| Variables            | 7        | Clearly define all outcomes, exposures, predictors, potential confounders, and effect modifiers. Give diagnostic criteria, if applicable                                                                                                                                                                                                                                                                                                                                       |                      |



| Section and Item             | Item No. | Recommendation                                                                                                                                                                                                                                                                                            | Reported on Page No. |
|------------------------------|----------|-----------------------------------------------------------------------------------------------------------------------------------------------------------------------------------------------------------------------------------------------------------------------------------------------------------|----------------------|
| Data Sources/<br>Measurement | 8*       | For each variable of interest, give sources of data and details of methods of assessment (measurement). Describe comparability of assessment methods if there is more than one group                                                                                                                      |                      |
| Bias                         | 9        | Describe any efforts to address potential sources of bias                                                                                                                                                                                                                                                 |                      |
| Study Size                   | 10       | Explain how the study size was arrived at                                                                                                                                                                                                                                                                 |                      |
| Quantitative Variables       | 11       | Explain how quantitative variables were handled in the analyses. If applicable, describe which groupings were chosen and why                                                                                                                                                                              |                      |
| Statistical Methods          | 12       | (a) Describe all statistical methods, including those used to control for confounding                                                                                                                                                                                                                     |                      |
|                              |          | (b) Describe any methods used to examine subgroups and interactions                                                                                                                                                                                                                                       |                      |
|                              |          | (c) Explain how missing data were addressed                                                                                                                                                                                                                                                               |                      |
|                              |          | (d) <i>Cohort study</i> —If applicable, explain how loss to follow-up was addressed<br><i>Case-control study</i> —If applicable, explain how matching of cases and controls was addressed<br><i>Cross-sectional study</i> —If applicable, describe analytical methods taking account of sampling strategy |                      |
|                              |          | (e) Describe any sensitivity analyses                                                                                                                                                                                                                                                                     |                      |
| <b>Results</b>               |          |                                                                                                                                                                                                                                                                                                           |                      |
| Participants                 | 13*      | (a) Report numbers of individuals at each stage of study—eg numbers potentially eligible, examined for eligibility, confirmed eligible, included in the study, completing follow-up, and analysed                                                                                                         |                      |
|                              |          | (b) Give reasons for non-participation at each stage                                                                                                                                                                                                                                                      |                      |
|                              |          | (c) Consider use of a flow diagram                                                                                                                                                                                                                                                                        |                      |
| Descriptive Data             | 14*      | (a) Give characteristics of study participants (eg demographic, clinical, social) and information on exposures and potential confounders                                                                                                                                                                  |                      |
|                              |          | (b) Indicate number of participants with missing data for each variable of interest                                                                                                                                                                                                                       |                      |
|                              |          | (c) <i>Cohort study</i> —Summarise follow-up time (eg, average and total amount)                                                                                                                                                                                                                          |                      |
| Outcome Data                 | 15*      | <i>Cohort study</i> —Report numbers of outcome events or summary measures over time                                                                                                                                                                                                                       |                      |
|                              |          | <i>Case-control study</i> —Report numbers in each exposure category, or summary measures of exposure                                                                                                                                                                                                      |                      |
|                              |          | <i>Cross-sectional study</i> —Report numbers of outcome events or summary measures                                                                                                                                                                                                                        |                      |

| Section and Item         | Item No. | Recommendation                                                                                                                                                                                               | Reported on Page No. |
|--------------------------|----------|--------------------------------------------------------------------------------------------------------------------------------------------------------------------------------------------------------------|----------------------|
| Main Results             | 16       | (a) Give unadjusted estimates and, if applicable, confounder-adjusted estimates and their precision (eg, 95% confidence interval). Make clear which confounders were adjusted for and why they were included |                      |
|                          |          | (b) Report category boundaries when continuous variables were categorized                                                                                                                                    |                      |
|                          |          | (c) If relevant, consider translating estimates of relative risk into absolute risk for a meaningful time period                                                                                             |                      |
| Other Analyses           | 17       | Report other analyses done—eg analyses of subgroups and interactions, and sensitivity analyses                                                                                                               |                      |
| <b>Discussion</b>        |          |                                                                                                                                                                                                              |                      |
| Key Results              | 18       | Summarise key results with reference to study objectives                                                                                                                                                     |                      |
| Limitations              | 19       | Discuss limitations of the study, taking into account sources of potential bias or imprecision. Discuss both direction and magnitude of any potential bias                                                   |                      |
| Interpretation           | 20       | Give a cautious overall interpretation of results considering objectives, limitations, multiplicity of analyses, results from similar studies, and other relevant evidence                                   |                      |
| Generalisability         | 21       | Discuss the generalisability (external validity) of the study results                                                                                                                                        |                      |
| <b>Other Information</b> |          |                                                                                                                                                                                                              |                      |
| Funding                  | 22       | Give the source of funding and the role of the funders for the present study and, if applicable, for the original study on which the present article is based                                                |                      |

\*Give information separately for cases and controls in case-control studies and, if applicable, for exposed and unexposed groups in cohort and cross-sectional studies.

**Once you have completed this checklist, please save a copy and upload it as part of your submission. DO NOT include this checklist as part of the main manuscript document. It must be uploaded as a separate file.**
