# Supplementary material for: Mental health in the UK during the COVID-19 pandemic: cross-sectional analyses from a community cohort study
Source: PubMed Central journal article supplement — BMJ Open. 2020 Sep 15;10(9):e040620. doi: 10.1136/bmjopen-2020-040620 (PMC7493070; doi:10.1136/bmjopen-2020-040620), 2020-09-15
Supplement: bmjopen-2020-040620supp001.pdf [file bmjopen-2020-040620supp001.pdf]

### Supplementary Appendices

**Appendix 1: Results from univariable regressions**

**Appendix 2: Multivariable regression models, excluding perceived risk of COVID-19**

**Appendix 3: Details of characteristics and measures**

**Appendix 4: Means for depression, anxiety and stress with overall means weighted to mid-2019 UK population distribution**

### Appendix 1: Results from univariable regressions

#### 1.1 Depression (PHQ-9)

**Table S1: Univariable regression coefficients for non-modifiable factors as predictors of depression scores**

| <b>PHQ-9 Total Score (Square-Root Transformed)</b> | Coefficient (Standard Error) |
|----------------------------------------------------|------------------------------|------------------------------|------------------------------|------------------------------|------------------------------|------------------------------|
| Age (per decade)                                   | -0.27****<br>(0.01)          |                              |                              |                              |                              |                              |
| Female                                             |                              | 0.37****<br>(0.06)           |                              |                              |                              |                              |
| Live alone                                         |                              |                              | 0.14*<br>(0.06)              |                              |                              |                              |
| BAME background                                    |                              |                              |                              | 0.23**<br>(0.07)             |                              |                              |
| Key-worker                                         |                              |                              |                              |                              | 0.12**<br>(0.04)             |                              |
| Risk Group <sup>a</sup><br>Most at Risk            |                              |                              |                              |                              |                              | 0.46****<br>(0.11)           |
| Increased Risk                                     |                              |                              |                              |                              |                              | 0.00<br>(0.02)               |
| Constant                                           | 3.68****<br>(0.06)           | 2.18****<br>(0.06)           | 2.47****<br>(0.02)           | 2.47****<br>(0.02)           | 2.43****<br>(0.03)           | 2.47****<br>(0.02)           |

\*\*\*\*  $p < 0.0001$ , \*\*\*  $p < 0.001$ , \*\*  $p < 0.01$ , \*  $p < 0.05$

<sup>a</sup> Comparison reference group "I am in neither risk category".

**Table S2: Univariable regression coefficients for modifiable factors as predictors of depression scores**

| PHQ-9 Total Score (Square-Root Transformed) | Coefficient (Standard Error) | Coefficient (Standard Error) | Coefficient (Standard Error) | Coefficient (Standard Error) |
|---------------------------------------------|------------------------------|------------------------------|------------------------------|------------------------------|
| Perceived loneliness                        | 0.25****<br>(0.01)           |                              |                              |                              |
| Positive mood                               |                              | -0.16****<br>(0.00)          |                              |                              |
| COVID-19 worry <sup>a</sup>                 |                              |                              |                              |                              |
| No worry                                    |                              |                              | 0.00<br>(0.06)               |                              |
| Much of time                                |                              |                              | 0.83****<br>(0.06)           |                              |
| Most of time                                |                              |                              | 1.33****<br>(0.11)           |                              |
| Perceived risk of COVID-19                  |                              |                              |                              | 0.08****<br>(0.01)           |
| Constant                                    | 1.55****<br>(0.03)           | 5.53****<br>(0.06)           | 2.33****<br>(0.03)           | 2.03****<br>(0.06)           |

\*\*\*\*  $p < 0.0001$ , \*\*\*  $p < 0.001$ , \*\*  $p < 0.01$ , \*  $p < 0.05$

<sup>a</sup> Comparison reference group "I occasionally worry about getting COVID-19"

**Table S3: Univariable logistic regression coefficients for non-modifiable factors as predictors of depression cases<sup>a</sup>**

| PHQ-9 "Cases"           | Odds Ratio [95% CI]      |
|-------------------------|--------------------------|--------------------------|--------------------------|--------------------------|--------------------------|--------------------------|
| Age (per decade)        | 0.68****<br>[0.65, 0.72] |                          |                          |                          |                          |                          |
| Female                  |                          | 1.43**<br>[1.14, 1.78]   |                          |                          |                          |                          |
| Live alone              |                          |                          | 1.15<br>[0.92, 1.43]     |                          |                          |                          |
| BAME background         |                          |                          |                          | 1.49**<br>[1.17, 1.91]   |                          |                          |
| Key-worker              |                          |                          |                          |                          | 1.16<br>[1.00, 1.35]     |                          |
| Risk Group <sup>b</sup> |                          |                          |                          |                          |                          |                          |
| Most at Risk            |                          |                          |                          |                          |                          | 1.59<br>[1.10, 2.31]     |
| Increased Risk          |                          |                          |                          |                          |                          | 1.14<br>[0.93, 1.39]     |
| Constant                | 2.37****<br>[1.86, 3.03] | 0.34****<br>[0.28, 0.42] | 0.45****<br>[0.42, 0.49] | 0.44****<br>[0.41, 0.48] | 0.43****<br>[0.38, 0.48] | 0.44****<br>[0.41, 0.48] |

\*\*\*\*  $p < 0.0001$ , \*\*\*  $p < 0.001$ , \*\*  $p < 0.01$ , \*  $p < 0.05$

<sup>a</sup> a "case" is defined as a PHQ-9 score greater than or equal to 10, at which level someone would qualify for high intensity psychological support in the NHS

<sup>b</sup> Comparison reference group "I am in neither risk category".

**Table S4: Univariable logistic regression coefficients for modifiable factors as predictors of depression cases <sup>a</sup>**

| PHQ-9 "Cases"               | Odds Ratio<br>[95% CI]   | Odds Ratio<br>[95% CI]        | Odds Ratio<br>[95% CI]    | Odds Ratio<br>[95% CI]   |
|-----------------------------|--------------------------|-------------------------------|---------------------------|--------------------------|
| Perceived loneliness        | 1.46****<br>[1.42, 1.51] |                               |                           |                          |
| Positive mood               |                          | 0.72****<br>[0.70, 0.74]      |                           |                          |
| COVID-19 worry <sup>b</sup> |                          |                               |                           |                          |
| No worry                    |                          |                               | 1.04<br>[0.84, 1.29]      |                          |
| Much of time                |                          |                               | 2.97****<br>[2.39, 3.69]  |                          |
| Most of time                |                          |                               | 8.27****<br>[5.44, 12.58] |                          |
| Perceived risk of COVID-19  |                          |                               |                           | 1.12****<br>[1.08, 1.16] |
| Constant                    | 0.09****<br>[0.08, 0.11] | 156.94****<br>[99.53, 247.47] | 0.35****<br>[0.32, 0.39]  | 0.24****<br>[0.20, 0.30] |

\*\*\*\*  $p < 0.0001$ , \*\*\*  $p < 0.001$ , \*\*  $p < 0.01$ , \*  $p < 0.05$

<sup>a</sup> a "case" is defined as a PHQ-9 score greater than or equal to 10, at which level someone would qualify for high intensity psychological support in the NHS

<sup>b</sup> Comparison reference group "I occasionally worry about getting COVID-19"

## 1.2 Anxiety (GAD-7)

**Table S5: Univariable regression coefficients for non-modifiable factors as predictors of anxiety scores**

| GAD-7 Total Score (Square-Root Transformed) | Coefficient (Standard Error) |
|---------------------------------------------|------------------------------|------------------------------|------------------------------|------------------------------|------------------------------|------------------------------|
| Age (per decade)                            | -0.24****<br>(0.01)          |                              |                              |                              |                              |                              |
| Female                                      |                              | 0.45****<br>(0.06)           |                              |                              |                              |                              |
| Live alone                                  |                              |                              | -0.21**<br>(0.07)            |                              |                              |                              |
| BAME background                             |                              |                              |                              | 0.17*<br>(0.08)              |                              |                              |
| Key-worker                                  |                              |                              |                              |                              | 0.15****<br>(0.04)           |                              |
| Risk Group <sup>a</sup><br>Most at Risk     |                              |                              |                              |                              |                              | 0.30**<br>(0.11)             |
| Increased Risk                              |                              |                              |                              |                              |                              | -0.04<br>(0.06)              |
| Constant                                    | 3.34****<br>(0.07)           | 1.87****<br>(0.06)           | 2.28****<br>(0.02)           | 2.23****<br>(0.02)           | 2.17****<br>(0.03)           | 2.25****<br>(0.02)           |

\*\*\*\*  $p < 0.0001$ , \*\*\*  $p < 0.001$ , \*\*  $p < 0.01$ , \*  $p < 0.05$

<sup>a</sup> Comparison reference group "I am in neither risk category".

**Table S6: Univariable regression coefficients for modifiable factors as predictors of anxiety scores**

| GAD-7 Total Score (Square-Root Transformed) | Coefficient (Standard Error) | Coefficient (Standard Error) | Coefficient (Standard Error) | Coefficient (Standard Error) |
|---------------------------------------------|------------------------------|------------------------------|------------------------------|------------------------------|
| Perceived loneliness                        | 0.21****<br>(0.01)           |                              |                              |                              |
| Positive mood                               |                              | -0.16****<br>(0.00)          |                              |                              |
| COVID-19 worry <sup>a</sup><br>No worry     |                              |                              | -0.22****<br>(0.06)          |                              |
| Much of time                                |                              |                              | 1.06****<br>(0.06)           |                              |
| Most of time                                |                              |                              | 1.75****<br>(0.11)           |                              |
| Perceived risk of COVID-19                  |                              |                              |                              | 0.12****<br>(0.01)           |
| Constant                                    | 1.45****<br>(0.03)           | 5.20****<br>(0.07)           | 2.08****<br>(0.02)           | 1.62****<br>(0.06)           |

\*\*\*\*  $p < 0.0001$ , \*\*\*  $p < 0.001$ , \*\*  $p < 0.01$ , \*  $p < 0.05$

<sup>a</sup> Comparison reference group "I occasionally worry about getting COVID-19"

**Table S7: Univariable logistic regression coefficients for non-modifiable factors as predictors of anxiety cases<sup>a</sup>**

| GAD-7 "Cases"                           | Odds Ratio<br>[95% CI]   |
|-----------------------------------------|--------------------------|--------------------------|--------------------------|--------------------------|--------------------------|--------------------------|
| Age (per decade)                        | 0.70****<br>[0.66, 0.75] |                          |                          |                          |                          |                          |
| Female                                  |                          | 1.56***<br>[1.22, 1.99]  |                          |                          |                          |                          |
| Live alone                              |                          |                          | 0.80<br>[0.62, 1.02]     |                          |                          |                          |
| BAME background                         |                          |                          |                          | 1.44**<br>[1.11, 1.86]   |                          |                          |
| Key-worker                              |                          |                          |                          |                          | 1.16<br>[0.99, 1.36]     |                          |
| Risk Group <sup>b</sup><br>Most at Risk |                          |                          |                          |                          |                          | 1.47<br>[0.997, 2.16]    |
| Increased Risk                          |                          |                          |                          |                          |                          | 0.96<br>[0.77, 1.19]     |
| Constant                                | 1.58***<br>[1.23, 2.04]  | 0.24****<br>[0.19, 0.30] | 0.36****<br>[0.33, 0.39] | 0.34****<br>[0.31, 0.37] | 0.33****<br>[0.29, 0.37] | 0.35****<br>[0.32, 0.38] |

\*\*\*\*  $p < 0.0001$ , \*\*\*  $p < 0.001$ , \*\*  $p < 0.01$ , \*  $p < 0.05$

<sup>a</sup> a "case" is defined as a GAD-7 score greater than or equal to 10, at which level someone would qualify for high intensity psychological support in the NHS

<sup>b</sup> Comparison reference group "I am in neither risk category".

**Table S8: Univariable logistic regression coefficients for modifiable factors as predictors of anxiety cases<sup>a</sup>**

| GAD-7 "Cases"                           | Odds Ratio<br>[95% CI]   | Odds Ratio<br>[95% CI]       | Odds Ratio<br>[95% CI]      | Odds Ratio<br>[95% CI]   |
|-----------------------------------------|--------------------------|------------------------------|-----------------------------|--------------------------|
| Perceived loneliness                    | 1.37****<br>[1.32, 1.41] |                              |                             |                          |
| Positive mood                           |                          | 0.74****<br>[0.72, 0.76]     |                             |                          |
| COVID-19 worry <sup>b</sup><br>No worry |                          |                              | 0.93<br>[0.72, 1.19]        |                          |
| Much of time                            |                          |                              | 5.03****<br>[4.02, 6.28]    |                          |
| Most of time                            |                          |                              | 24.75****<br>[14.83, 41.31] |                          |
| Perceived risk of COVID-19              |                          |                              |                             | 1.18****<br>[1.14, 1.23] |
| Constant                                | 0.09****<br>[0.08, 0.11] | 70.16****<br>[45.39, 108.44] | 0.23****<br>[0.21, 0.26]    | 0.14****<br>[0.11, 0.18] |

\*\*\*\*  $p < 0.0001$ , \*\*\*  $p < 0.001$ , \*\*  $p < 0.01$ , \*  $p < 0.05$

<sup>a</sup> a "case" is defined as a GAD-7 score greater than or equal to 10, at which level someone would qualify for high intensity psychological support in the NHS

<sup>b</sup> Comparison reference group "I occasionally worry about getting COVID-19"

### 1.3 Stress (PSS-4)

**Table S9: Univariable regression coefficients for non-modifiable factors as predictors of stress scores**

| PSS-4 Total Score       | Coefficient<br>(Standard Error) |
|-------------------------|---------------------------------|---------------------------------|---------------------------------|---------------------------------|---------------------------------|---------------------------------|
| Age (per decade)        | -0.52****<br>(0.04)             |                                 |                                 |                                 |                                 |                                 |
| Female                  |                                 | 0.71****<br>(0.16)              |                                 |                                 |                                 |                                 |
| Live alone              |                                 |                                 | 0.13<br>(0.17)                  |                                 |                                 |                                 |
| BAME background         |                                 |                                 |                                 | 0.84****<br>(0.20)              |                                 |                                 |
| Key-worker              |                                 |                                 |                                 |                                 | -0.11<br>(0.12)                 |                                 |
| Risk Group <sup>a</sup> |                                 |                                 |                                 |                                 |                                 |                                 |
| Most at Risk            |                                 |                                 |                                 |                                 |                                 | 0.97***<br>(0.30)               |
| Increased Risk          |                                 |                                 |                                 |                                 |                                 | -0.09<br>(0.16)                 |
| Constant                | 8.84****<br>(0.18)              | 5.88****<br>(0.15)              | 6.46****<br>(0.06)              | 6.40****<br>(0.06)              | 6.53****<br>(0.08)              | 6.45****<br>(0.07)              |

\*\*\*\*  $p < 0.0001$ , \*\*\*  $p < 0.001$ , \*\*  $p < 0.01$ , \*  $p < 0.05$

<sup>a</sup> Comparison reference group "I am in neither risk category".

**Table S10: Univariable regression coefficients for modifiable factors as predictors of stress scores**

| PSS-4 Total Score           | Coefficient<br>(Standard Error) | Coefficient<br>(Standard Error) | Coefficient<br>(Standard Error) | Coefficient<br>(Standard Error) |
|-----------------------------|---------------------------------|---------------------------------|---------------------------------|---------------------------------|
| Perceived loneliness        | 0.62****<br>(0.02)              |                                 |                                 |                                 |
| Positive mood               |                                 | -0.46****<br>(0.01)             |                                 |                                 |
| COVID-19 worry <sup>a</sup> |                                 |                                 |                                 |                                 |
| No worry                    |                                 |                                 | -0.14<br>(0.15)                 |                                 |
| Much of time                |                                 |                                 | 1.90****<br>(0.17)              |                                 |
| Most of time                |                                 |                                 | 3.78****<br>(0.29)              |                                 |
| Perceived risk of COVID-19  |                                 |                                 |                                 | 0.22****<br>(0.03)              |
| Constant                    | 4.09****<br>(0.09)              | 15.28****<br>(0.16)             | 6.10****<br>(0.07)              | 5.31****<br>(0.15)              |

\*\*\*\*  $p < 0.0001$ , \*\*\*  $p < 0.001$ , \*\*  $p < 0.01$ , \*  $p < 0.05$

<sup>a</sup> Comparison reference group "I occasionally worry about getting COVID-19"

## Appendix 2: Multivariable regression models, excluding perceived risk of COVID-19

Table S11: Regression model showing associations between modifiable explanatory variables and depression scores (excluding perceived risk of COVID-19)

|                                              | B     | 95% CI Lower | 95% CI Upper | $\beta$ | p          |
|----------------------------------------------|-------|--------------|--------------|---------|------------|
| <b>PHQ-9 Total Score<sup>a</sup></b>         |       |              |              |         |            |
| Age (per decade)                             | -0.18 | -0.20        | -0.16        | -0.22   | <.0001**** |
| Female                                       | 0.20  | 0.11         | 0.28         | 0.06    | <.0001**** |
| Live alone                                   | -0.00 | -0.10        | 0.09         | -0.00   | 0.92       |
| BAME background                              | -0.06 | -0.16        | 0.04         | -0.01   | 0.26       |
| Key-worker                                   | 0.07  | 0.01         | 0.12         | 0.03    | 0.03*      |
| Risk Group <sup>b</sup>                      |       |              |              |         |            |
| Most at Risk                                 | 0.20  | 0.05         | 0.35         | 0.03    | 0.01**     |
| Increased Risk                               | 0.15  | 0.07         | 0.23         | 0.05    | <.001***   |
| Perceived loneliness                         | 0.10  | 0.08         | 0.11         | 0.22    | <.0001**** |
| Positive mood                                | -0.12 | -0.13        | -0.11        | -0.50   | <.0001**** |
| COVID-19 worry <sup>c</sup>                  |       |              |              |         |            |
| No worry                                     | 0.03  | -0.05        | 0.11         | 0.01    | 0.45       |
| Much of time                                 | 0.26  | 0.18         | 0.35         | 0.07    | <.0001**** |
| Most of time                                 | 0.34  | 0.19         | 0.50         | 0.05    | <.0001**** |
| <b>Adj R<sup>2</sup>=.56, p&lt;.0001****</b> |       |              |              |         |            |

\*\*\*\* p<0.0001, \*\*\* p<0.001, \*\* p<0.01, \* p<0.05

<sup>a</sup> A square-root transformation was applied to the dependent variable

<sup>b</sup> Comparison reference group "I am in neither risk category".

<sup>c</sup> Comparison reference group "I occasionally worry about getting COVID-19"

Table S12: Logistic regression model showing associations between modifiable explanatory variables and depression cases (excluding perceived risk of COVID-19)

|                                          | Odds Ratio | 95% CI Lower | 95% CI Upper | $\beta$ | p          |
|------------------------------------------|------------|--------------|--------------|---------|------------|
| <b>PHQ-9 "Cases"<sup>a</sup></b>         |            |              |              |         |            |
| Age (per decade)                         | 0.68       | 0.63         | 0.73         | -1.24   | <.0001**** |
| Female                                   | 1.20       | 0.90         | 1.60         | 0.14    | 0.21       |
| Live alone                               | 0.84       | 0.61         | 1.15         | -0.13   | 0.28       |
| BAME background                          | 0.98       | 0.70         | 1.37         | -0.01   | 0.90       |
| Key-worker                               | 1.22       | 1.00         | 1.48         | 0.21    | 0.05       |
| Risk Group <sup>b</sup>                  |            |              |              |         |            |
| Most at Risk                             | 1.18       | 0.72         | 1.94         | 0.07    | 0.51       |
| Increased Risk                           | 1.44       | 1.10         | 1.89         | 0.30    | 0.007**    |
| Perceived loneliness                     | 1.21       | 1.16         | 1.26         | 1.12    | <.0001**** |
| Positive mood                            | 0.76       | 0.74         | 0.78         | -2.96   | <.0001**** |
| COVID-19 worry <sup>c</sup>              |            |              |              |         |            |
| No worry                                 | 0.93       | 0.70         | 1.24         | -0.06   | 0.63       |
| Much of time                             | 1.58       | 1.21         | 2.07         | 0.34    | <.001***   |
| Most of time                             | 2.65       | 1.58         | 4.43         | 0.40    | <.001***   |
| <b>Pseudo R<sup>2</sup>=0.34, n=3090</b> |            |              |              |         |            |

\*\*\*\* p<0.0001, \*\*\* p<0.001, \*\* p<0.01, \* p<0.05

<sup>a</sup> a "case" is defined as a PHQ-9 score greater than or equal to 10, at which level someone would qualify for high intensity psychological support in the NHS

<sup>b</sup> Comparison reference group "I am in neither risk category".

<sup>c</sup> Comparison reference group "I occasionally worry about getting COVID-19"

**Table S13: Regression model showing associations between modifiable explanatory variables and anxiety scores (excluding perceived risk of COVID-19)**

|                                      | B     | 95% CI Lower | 95% CI Upper | $\beta$ | p          |
|--------------------------------------|-------|--------------|--------------|---------|------------|
| <b>GAD-7 Total Score<sup>a</sup></b> |       |              |              |         |            |
| Age (per decade)                     | -0.16 | -0.19        | -0.14        | -0.20   | <.0001**** |
| Female                               | 0.25  | 0.16         | 0.33         | 0.07    | <.0001**** |
| Live alone                           | -0.27 | -0.36        | -0.17        | -0.07   | <.0001**** |
| BAME background                      | -0.08 | -0.18        | 0.03         | -0.02   | 0.14       |
| Key-worker                           | 0.04  | -0.02        | 0.10         | 0.02    | 0.17       |
| Risk Group <sup>b</sup>              |       |              |              |         |            |
| Most at Risk                         | 0.01  | -0.15        | 0.17         | 0.00    | 0.92       |
| Increased Risk                       | 0.06  | -0.02        | 0.15         | 0.02    | 0.13       |
| Perceived loneliness                 | 0.06  | 0.05         | 0.07         | 0.13    | <.0001**** |
| Positive mood                        | -0.12 | -0.12        | -0.11        | -0.48   | <.0001**** |
| COVID-19 worry <sup>c</sup>          |       |              |              |         |            |
| No worry                             | -0.19 | -0.27        | -0.11        | -0.06   | <.0001**** |
| Much of time                         | 0.57  | 0.48         | 0.66         | 0.16    | <.0001**** |
| Most of time                         | 0.87  | 0.71         | 1.03         | 0.14    | <.0001**** |
| <b>Adj R<sup>2</sup>=.53, n=3090</b> |       |              |              |         |            |

\*\*\*\*  $p < 0.0001$ , \*\*\*  $p < 0.001$ , \*\*  $p < 0.01$ , \*  $p < 0.05$

<sup>a</sup> A square-root transformation was applied to the dependent variable

<sup>b</sup> Comparison reference group "I am in neither risk category".

<sup>c</sup> Comparison reference group "I occasionally worry about getting COVID-19"

**Table S14: Logistic regression model showing associations between modifiable explanatory variables and anxiety cases (excluding perceived risk of COVID-19)**

|                                          | Odds Ratio | 95% CI Lower | 95% CI Upper | $\beta$ | p          |
|------------------------------------------|------------|--------------|--------------|---------|------------|
| <b>GAD-7 "Cases"<sup>a</sup></b>         |            |              |              |         |            |
| Age (per decade)                         | 0.69       | 0.64         | 0.75         | -1.25   | <.0001**** |
| Female                                   | 1.23       | 0.91         | 1.67         | 0.17    | 0.18       |
| Live alone                               | 0.56       | 0.40         | 0.79         | -0.44   | <.001***   |
| BAME background                          | 0.91       | 0.65         | 1.29         | -0.06   | 0.61       |
| Key-worker                               | 1.11       | 0.90         | 1.36         | 0.11    | 0.34       |
| Risk Group <sup>b</sup>                  |            |              |              |         |            |
| Most at Risk                             | 0.88       | 0.53         | 1.47         | -0.05   | 0.63       |
| Increased Risk                           | 0.93       | 0.70         | 1.25         | -0.06   | 0.65       |
| Perceived loneliness                     | 1.13       | 1.08         | 1.18         | 0.76    | <.0001**** |
| Positive mood                            | 0.78       | 0.75         | 0.80         | -2.91   | <.0001**** |
| COVID-19 worry <sup>c</sup>              |            |              |              |         |            |
| No worry                                 | 0.72       | 0.53         | 0.98         | -0.28   | 0.04*      |
| Much of time                             | 3.59       | 2.76         | 4.68         | 0.99    | <.0001**** |
| Most of time                             | 12.54      | 6.97         | 22.56        | 1.11    | <.0001**** |
| <b>Pseudo R<sup>2</sup>=0.34, n=3090</b> |            |              |              |         |            |

\*\*\*\*  $p < 0.0001$ , \*\*\*  $p < 0.001$ , \*\*  $p < 0.01$ , \*  $p < 0.05$

<sup>a</sup> a "case" is defined as a GAD-7 score greater than or equal to 10, at which level someone would qualify for high intensity psychological support in the NHS

<sup>b</sup> Comparison reference group "I am in neither risk category".

<sup>c</sup> Comparison reference group "I occasionally worry about getting COVID-19"



**Table S15: Regression model showing associations between modifiable explanatory variables and stress scores (excluding perceived risk of COVID-19)**

|                                      | <b>B</b> | <b>95% CI Lower</b> | <b>95% CI Upper</b> | <b><math>\beta</math></b> | <b><i>p</i></b> |
|--------------------------------------|----------|---------------------|---------------------|---------------------------|-----------------|
| <b>PSS-4 Total Score</b>             |          |                     |                     |                           |                 |
| Age (per decade)                     | -0.25    | -0.30               | -0.19               | -0.11                     | <.0001****      |
| Female                               | 0.31     | 0.09                | 0.52                | 0.03                      | 0.005**         |
| Live alone                           | -0.37    | -0.61               | -0.13               | -0.04                     | 0.003**         |
| BAME background                      | 0.21     | -0.06               | 0.47                | 0.02                      | 0.13            |
| Key-worker                           | -0.24    | -0.40               | -0.09               | -0.04                     | 0.002**         |
| Risk Group <sup>a</sup>              |          |                     |                     |                           |                 |
| Most at Risk                         | 0.14     | -0.27               | 0.54                | 0.01                      | 0.50            |
| Increased Risk                       | 0.08     | -0.13               | 0.30                | 0.01                      | 0.43            |
| Perceived loneliness                 | 0.20     | 0.17                | 0.24                | 0.17                      | <.0001****      |
| Positive mood                        | -0.38    | -0.40               | -0.36               | -0.59                     | <.0001****      |
| COVID-19 worry <sup>b</sup>          |          |                     |                     |                           |                 |
| No worry                             | 0.01     | -0.21               | 0.22                | 0.00                      | 0.94            |
| Much of time                         | 0.36     | 0.12                | 0.59                | 0.04                      | 0.003**         |
| Most of time                         | 0.99     | 0.57                | 1.40                | 0.06                      | <.0001****      |
| <b>Adj R<sup>2</sup>=.56, n=3090</b> |          |                     |                     |                           |                 |

\*\*\*\*  $p < 0.0001$ , \*\*\*  $p < 0.001$ , \*\*  $p < 0.01$ , \*  $p < 0.05$

<sup>a</sup> Comparison reference group "I am in neither risk category".

<sup>b</sup> Comparison reference group "I occasionally worry about getting COVID-19"

## Appendix 3: Summary of modifiable and non-modifiable explanatory factors considered in the analysis

Table S16: Explanatory factors considered in the analysis

|                               | Question/scale                                                                      | Response(s)                                                                                                                                                                                                                                                                                                                                                                                                                                                                                                                                                                                                       |
|-------------------------------|-------------------------------------------------------------------------------------|-------------------------------------------------------------------------------------------------------------------------------------------------------------------------------------------------------------------------------------------------------------------------------------------------------------------------------------------------------------------------------------------------------------------------------------------------------------------------------------------------------------------------------------------------------------------------------------------------------------------|
| <b>Non-modifiable factors</b> |                                                                                     |                                                                                                                                                                                                                                                                                                                                                                                                                                                                                                                                                                                                                   |
| Gender*                       | What was your gender at birth?                                                      | Male<br>Female<br>Other<br>Prefer not to say                                                                                                                                                                                                                                                                                                                                                                                                                                                                                                                                                                      |
| Age                           | How old are you?                                                                    | ..                                                                                                                                                                                                                                                                                                                                                                                                                                                                                                                                                                                                                |
| Ethnicity*                    | What is your ethnicity                                                              | White – British, Irish, other<br>Asian/Asian British – Indian, Pakistani, Bangladeshi, other<br>Black/Black British – Caribbean, African, other<br>Chinese/Chinese British<br>Mixed race – White and Black/Black British<br>Middle Eastern/Middle Eastern British – Arab, Turkish, other<br>Mixed race – other<br>Other ethnic group<br>Prefer not to say                                                                                                                                                                                                                                                         |
| Key-worker status             | Are you currently fulfilling any of the government’s identified ‘key worker’ roles? | Health, social care ore relevant related support worker<br>Teacher or childcare worker still travelling in to work<br>Transport worker still travelling in to work<br>Food chain worker (e.g. production, sale, delivery)<br>Key public services worker (e.g. justice staff, religious staff, public service journalist or mortuary worker)<br>Local or national government worker delivering essential public services<br>Utility worker (e.g. energy, sewerage, postal service)<br>Public safety or national security worker<br>Worker involved in medicines or protective equipment production or distribution |

|                                          |                                                                                                                                     |                                                                                                                                                                                           |
|------------------------------------------|-------------------------------------------------------------------------------------------------------------------------------------|-------------------------------------------------------------------------------------------------------------------------------------------------------------------------------------------|
|                                          |                                                                                                                                     | Other 'key worker' role not listed                                                                                                                                                        |
|                                          |                                                                                                                                     | None of these                                                                                                                                                                             |
| Living alone/with others                 | Do you live with someone?                                                                                                           | Yes<br>No                                                                                                                                                                                 |
| Recognised risk group for COVID-19       | Which of these 3 COVID-19 risk groups do you think you are in?                                                                      | I am most at risk (e.g., suffering from advanced cancer, severe asthma/COPD, etc.)<br>I am at increased risk (e.g., being pregnant, aged over 70, etc.)<br>I am in neither risk category. |
| <b>Modifiable factors</b>                |                                                                                                                                     |                                                                                                                                                                                           |
| <i>Perceived loneliness</i> <sup>†</sup> | On a scale of 1-10, how lonely have you felt over the past 2 weeks?                                                                 | 1 (Not at all lonely) - 10 (Extremely lonely)                                                                                                                                             |
| <i>Perceived risk of COVID-19</i>        | On a scale of 1-10, what do you believe your risk of getting COVID-19 is?                                                           | 1 (I don't think I will get it) - 10 (I know I will most certainly get it)                                                                                                                |
| <i>Positive mood</i> <sup>‡</sup>        | In the past 2 weeks, I have felt Positive.                                                                                          | 1=Very rarely or never/ 2=Rarely/ 3=Sometimes/ 4=Often/ 5=Very often or always                                                                                                            |
|                                          | In the past 2 weeks, I have felt Good.                                                                                              | 1=Very rarely or never/ 2=Rarely/ 3=Sometimes/ 4=Often/ 5=Very often or always                                                                                                            |
|                                          | In the past 2 weeks, I have felt Pleasant.                                                                                          | 1=Very rarely or never/ 2=Rarely/ 3=Sometimes/ 4=Often/ 5=Very often or always                                                                                                            |
|                                          | In the past 2 weeks, I have felt Happy.                                                                                             | 1=Very rarely or never/ 2=Rarely/ 3=Sometimes/ 4=Often/ 5=Very often or always                                                                                                            |
|                                          | In the past 2 weeks, I have felt Joyful.                                                                                            | 1=Very rarely or never/ 2=Rarely/ 3=Sometimes/ 4=Often/ 5=Very often or always                                                                                                            |
| <i>COVID-19 worry</i>                    | In the past 2 weeks, I have felt Contented.                                                                                         | 1=Very rarely or never/ 2=Rarely/ 3=Sometimes/ 4=Often/ 5=Very often or always                                                                                                            |
|                                          | Please read the following statements carefully and then select the one which best describe how you have felt over the past 2 weeks. | I do not worry about getting COVID-19.                                                                                                                                                    |
|                                          |                                                                                                                                     | I occasionally worry about getting COVID-19.                                                                                                                                              |
|                                          |                                                                                                                                     | I spend much of my time worrying about getting COVID-19.                                                                                                                                  |
|                                          |                                                                                                                                     | I spend most of my time worrying about getting COVID-19.                                                                                                                                  |

\*Gender and ethnicity were treated as binary variables in all analyses: gender (male, female), ethnicity (white British, non-white British).

<sup>†</sup> The factors in *Italic* were hypothesised to be associated with an increased risk of adverse mental health outcomes, apart from key-worker status where evidence exists that some key-worker roles are also associated with an increased risk of adverse COVID-19 outcomes. All other factors were hypothesised to be associated with an increased risk of contracting COVID-19 and/or poorer disease outcomes.

<sup>‡</sup>Positive mood was measured using the positive items from SPANE: Scale of Positive and Negative Experience ( $\alpha=0.94$ ).<sup>25</sup>

#### Appendix 4: Means for depression, anxiety and stress with overall means weighted to mid-2019 UK population distribution

Table S17: Means for depression, anxiety and stress scores with overall means weighted to UK mid-2019 population distribution

|                                               | Number | Depression (PHQ-9) score | Anxiety (GAD-7) score | Stress (PSS-4) score |
|-----------------------------------------------|--------|--------------------------|-----------------------|----------------------|
|                                               |        | Participants             | Participants          | Participants         |
|                                               |        | Mean                     | Mean                  | Mean                 |
| <b>Males</b>                                  |        |                          |                       |                      |
| <b>Age group</b>                              |        |                          |                       |                      |
| 18-19                                         | 9      | 8.11                     | 4.67                  | 5.11                 |
| 20-24                                         | 68     | 9.88                     | 7.49                  | 7.06                 |
| 25-29                                         | 42     | 8.12                     | 6.24                  | 6.55                 |
| 30-34                                         | 34     | 7.94                     | 6.82                  | 6.53                 |
| 35-39                                         | 42     | 6.40                     | 5.88                  | 5.74                 |
| 40-44                                         | 51     | 7.04                     | 5.59                  | 5.90                 |
| 45-49                                         | 37     | 7.14                     | 6.30                  | 6.46                 |
| 50-54                                         | 43     | 6.51                     | 4.56                  | 6.07                 |
| 55-59                                         | 42     | 5.64                     | 5.17                  | 6.00                 |
| 60-64                                         | 29     | 5.07                     | 4.03                  | 5.21                 |
| 65-69                                         | 40     | 2.03                     | 1.83                  | 4.05                 |
| 70-74                                         | 24     | 2.46                     | 2.08                  | 4.63                 |
| 75-79                                         | 7      | 1.71                     | 1.57                  | 3.71                 |
| 80+                                           | 8      | 3.25                     | 1.90                  | 3.55                 |
| <b>Overall<sup>1</sup></b>                    | 476    | <b>6.08</b>              | <b>4.91</b>           | <b>5.68</b>          |
| <b>Females</b>                                |        |                          |                       |                      |
| <b>Age group</b>                              |        |                          |                       |                      |
| 18-19                                         | 35     | 9.29                     | 8.37                  | 7.57                 |
| 20-24                                         | 252    | 11.99                    | 9.68                  | 8.60                 |
| 25-29                                         | 215    | 9.13                     | 7.84                  | 7.01                 |
| 30-34                                         | 237    | 8.62                     | 8.03                  | 7.00                 |
| 35-39                                         | 266    | 9.05                     | 8.12                  | 7.20                 |
| 40-44                                         | 277    | 7.95                     | 6.94                  | 6.47                 |
| 45-49                                         | 299    | 7.91                     | 6.58                  | 6.38                 |
| 50-54                                         | 311    | 6.90                     | 6.23                  | 5.92                 |
| 55-59                                         | 298    | 6.80                     | 5.98                  | 6.20                 |
| 60-64                                         | 201    | 6.01                     | 4.88                  | 5.63                 |
| 65-69                                         | 127    | 4.68                     | 3.98                  | 5.59                 |
| 70-74                                         | 66     | 3.77                     | 3.41                  | 4.83                 |
| 75-79                                         | 24     | 4.75                     | 3.42                  | 5.42                 |
| 80+                                           | 9      | 4.00                     | 2.07                  | 6.15                 |
| <b>Overall<sup>1</sup></b>                    | 2617   | <b>7.32</b>              | <b>6.18</b>           | <b>6.36</b>          |
| <b>Overall: Males and females<sup>1</sup></b> |        | <b>6.71</b>              | <b>5.56</b>           | <b>6.03</b>          |

<sup>1</sup> Overall means weighted to mid-year population distribution of UK for 2019
